# Supplementary material for: In vivo gene editing of outer hair cells prevents progressive hearing loss in a dominant-negative KCNQ4 murine model
Source: Research Square preprint supplement (doi:10.21203/rs.3.rs-152704/v1), 2021-02-04
Supplement: Supplementary file 2 [file fc8dc82f474c98a6ab506035.xlsx]

## Sheet: Supplementary Table 1
Supplementary Table 1. Mutational profiles of KCNQ4 mutations identified in the adult-onset hearing loss cohort
Gene	Nucleotide change	Amino acid change	Pathogenicity of variants		Proportion in the patient cohort		Allele frequency in population database			In silico prediction results
			ACMG classification	Functional study publication (PMID)	Allele frequency in AHL cohort	Proportion of AHL patients with definitive genetic diagnosis	gnomAD	KRGDB	dbSNP	Mutation Taster	PP2_Humvar	SIFT	Condel	CADD
KCNQ4 (NM_004700.4)	c.140T>C	p.L47P	Pathogenic	30556268	1.17% (5/426)	6.94% (5/72)	0	0.007153	rs1271250198	DC (1)	Benign (0.003)	Del (0.03)	Neu (0.364)	16.52
	c.261_269del	p.Y88_V90del	Pathogenic	30413759	0.23% (1/426)	1.39% (1/72)	0	0	none	Pol (0.866)	NA	NA	NA	NA
	c.796G>T	p.D266Y	Pathogenic	30413759	0.23% (1/426)	1.39% (1/72)	0	0	none	DC (1)	Dam (0.980)	Del (0.02)	Del (0.871)	29.4
	c.992G>A	p.R331Q	Likely pathogenic	none	0.23% (1/426)	1.39% (1/72)	4.102e-06	0	rs1408578386	DC (1)	Dam (0.992)	Del (0)	Del (0.935)	32
	c.1339C>T	p.R447W	Likely pathogenic	none	0.23% (1/426)	1.39% (1/72)	0	0	rs758333323	Pol (0.838)	Benign (0.446)	Del (0.02)	Del (0.666)	25.9

## Sheet: Supplementary Table 2
Supplementary Table 2. Prediction scores for gene-editing efficiency on the Kcnq4 mutation (c.830G>C) target sequence in 9 Cas9 variants using the deepSpCas9 tool
ID	Guide Sequence (20bp)	Target Sequence (30bp)	GC Contents (%)	Cas9 Variant Type
				SpCas9	Sniper-Cas9	xCas9	eSpCs9 (1.1)	SpCas9-HF1	HypaCas9	evoCas9	VRQR variant	SpCas9-NG
Kcnq4 sgRNA T3	CGACTCGCTCTGGTCGGGGA	ATGCCGACTCGCTCTGGTCGGGGACGGTGC	70	53.332	51.547	34.949	0	0	5.234	0	37.4	17.653
Kcnq4 sgRNA T1	ATGCCGACTCGCTCTGGTCG	TCCTATGCCGACTCGCTCTGGTCGGGGACG	65	62.01	52.852	32.52	49.37	50.094	44.203	16.106	42.681	22.147
Kcnq4 sgRNA T2	TATGCCGACTCGCTCTGGTC	CTCCTATGCCGACTCGCTCTGGTCGGGGAC	60	48.173	45.347	19.246	46.812	45.672	43.503	2.391	38.975	23.847
Kcnq4 sgRNA T4	CGTCCCCGACCAGAGCGAGT	GCACCGTCCCCGACCAGAGCGAGTCGGCAT	70	54.651	53.458	46.234	50.638	52.629	54.295	17.615	28.696	17.198
Kcnq4 sgRNA T5	CCGACTCGCTCTGGTCGGGG	TATGCCGACTCGCTCTGGTCGGGGACGGTG	75	12.678	9.214	3.779	0	0	0	0	3.58	NA
Kcnq4 sgRNA T6	CCGTCCCCGACCAGAGCGAG	CGCACCGTCCCCGACCAGAGCGAGTCGGCA	75	10.983	8.208	2.376	0	0	0	0	NA	NA
Kcnq4 sgRNA T7	CCGACCAGAGCGAGTCGGCA	GTCCCCGACCAGAGCGAGTCGGCATAGGAG	70	11.199	13.831	0	0	0	0	0	10.712	5.003
Kcnq4 sgRNA T8	ACTCGCTCTGGTCGGGGACG	GCCGACTCGCTCTGGTCGGGGACGGTGCGT	70	8.503	16.805	5.147	3.923	0.991	0.184	0	2.971	NA
Kcnq4 sgRNA T9	GTCCCCGACCAGAGCGAGTC	CACCGTCCCCGACCAGAGCGAGTCGGCATA	70	5.795	5.584	3.538	1.157	0.028	0	1.638	24.914	9
Kcnq4 sgRNA T10	GACTCGCTCTGGTCGGGGAC	TGCCGACTCGCTCTGGTCGGGGACGGTGCG	70	NA	NA	5.852	NA	NA	NA	NA	33.089	22.784
Kcnq4 sgRNA T11	ACCGTCCCCGACCAGAGCGA	ACGCACCGTCCCCGACCAGAGCGAGTCGGC	70	NA	NA	NA	NA	NA	NA	NA	9.981	NA
Kcnq4 sgRNA T12	GCCGACTCGCTCTGGTCGGG	CTATGCCGACTCGCTCTGGTCGGGGACGGT	75	NA	NA	NA	NA	NA	NA	NA	9.795	8.589
Kcnq4 sgRNA T13	CCCGACCAGAGCGAGTCGGC	CGTCCCCGACCAGAGCGAGTCGGCATAGGA	75	NA	NA	NA	NA	NA	NA	NA	2.071	6.016
* Prediction scores were adopted from "(G/g)N_19 sgRNA" section in deepSpCas9 program.
Abbreviation: NA, no activity.

## Sheet: Supplementary Table 3
Supplementary Table 3.Prediction scores for gene-editing efficiency on the 49 KCNQ4 mutation target sequences in 9 Cas9 variants using deepSpCas9 tool
Mutation number	Mutation (amino acid change)	Mutation (nucleotide change)	Mutation location (hg19 position)	Mutation database	sgRNA candidate	Guide RNA Sequence	DeepSpCas9 Variants Prediction Score
							SpCas9	Sniper-Cas9	xCas9	eSpCs9	SpCas9-HF1	HypaCas9	evoCas9	VRQR variant	SpCas9-NG
1	p.L47P	c.140T>C	chr1:41249905	ClinVar and HGMD	1	CTGGGCAGCCCCCTGCCGCC	51.682	43.851	26.541	43.665	35.494	36.012	3.933	25.745	11.216
1	p.L47P	c.140T>C	chr1:41249905	ClinVar and HGMD	2	CCGCGCCGCCTCGGCCCCCT	50.982	48.827	33.917	20.672	2.251	20.441	0	21.394	13.271
1	p.L47P	c.140T>C	chr1:41249905	ClinVar and HGMD	3	GGCGGCAGGGGGCTGCCCAG	48.294	46.087	33.433	46.526	39.493	40.813	35.066	42.735	38.498
1	p.L47P	c.140T>C	chr1:41249905	ClinVar and HGMD	4	CCCGCGCCGCCTCGGCCCCC	45.924	41.094	23.583	40.311	33.204	36.326	9.478	33.359	31.624
1	p.L47P	c.140T>C	chr1:41249905	ClinVar and HGMD	5	CGGCGGCAGGGGGCTGCCCA	45.766	45.897	14.315	17.111	0	7.762	0	34.093	27.902
1	p.L47P	c.140T>C	chr1:41249905	ClinVar and HGMD	6	CGCCGGGCGCGCCCCTCCCT	44.895	43.792	22.391	43.099	21.189	34.922	10.178	20.939	22.307
1	p.L47P	c.140T>C	chr1:41249905	ClinVar and HGMD	7	CCTGGGCAGCCCCCTGCCGC	44.739	41.637	23.496	46.139	40.537	41.508	14.697	35.102	24.516
1	p.L47P	c.140T>C	chr1:41249905	ClinVar and HGMD	8	CCGCCGGGCGCGCCCCTCCC	43.392	44.378	21.366	33.066	4.758	31.229	0	31.902	27.37
1	p.L47P	c.140T>C	chr1:41249905	ClinVar and HGMD	9	GGCGCGCCCCTCCCTGGGCC	43.253	31.088	10.79	38.564	31.124	29.783	10.993	17.031	5.313
1	p.L47P	c.140T>C	chr1:41249905	ClinVar and HGMD	10	GGGGCGCGCCCGGCGGCAGG	43.06	46.106	33.354	41.35	38.849	42.449	23.215	29.374	16.767
1	p.L47P	c.140T>C	chr1:41249905	ClinVar and HGMD	11	AGGGGCGCGCCCGGCGGCAG	43.019	43.047	19.507	37.056	29.672	34.11	10.841	33.286	28.144
1	p.L47P	c.140T>C	chr1:41249905	ClinVar and HGMD	12	CAGGGGGCCGAGGCGGCGCG	41.682	40.317	16.712	21.33	6.215	16.2	0	34.194	27.639
1	p.L47P	c.140T>C	chr1:41249905	ClinVar and HGMD	13	GCGGCAGGGGGCTGCCCAGG	40.897	43.181	28.87	38.212	36.502	41.521	45.24	31.249	24.934
1	p.L47P	c.140T>C	chr1:41249905	ClinVar and HGMD	14	GAGGGGCGCGCCCGGCGGCA	40.769	41.669	16.069	39.832	39.32	30.999	28.222	29.707	24.446
1	p.L47P	c.140T>C	chr1:41249905	ClinVar and HGMD	15	GGGCGCGCCCCTCCCTGGGC	40.73	31.707	15.058	33.737	14.332	13.737	1.153	24.285	14.969
1	p.L47P	c.140T>C	chr1:41249905	ClinVar and HGMD	16	CCGGCGGCAGGGGGCTGCCC	40.112	34.599	3.86	30.77	6.847	29.088	0	19.9	11.845
1	p.L47P	c.140T>C	chr1:41249905	ClinVar and HGMD	17	GGGGGCTGCCCAGGGGGCCG	39.966	33.672	10.796	40.309	29.546	31.384	11.534	14.001	9.598
1	p.L47P	c.140T>C	chr1:41249905	ClinVar and HGMD	18	GGCCCAGGGAGGGGCGCGCC	38.934	30.621	17.091	24.53	2.786	0.872	0	10.705	0
1	p.L47P	c.140T>C	chr1:41249905	ClinVar and HGMD	19	CCAGGGAGGGGCGCGCCCGG	38.781	39.401	38.093	36.394	18.218	35.908	7.702	20.502	8.15
1	p.L47P	c.140T>C	chr1:41249905	ClinVar and HGMD	20	CCAGGGGGCCGAGGCGGCGC	37.842	39.07	18.169	40.156	38.877	38.226	3.622	31.369	14.683
1	p.L47P	c.140T>C	chr1:41249905	ClinVar and HGMD	21	GGCTGCCCAGGGGGCCGAGG	36.487	36.872	17.294	33.668	10.34	27.838	17.646	18.362	13.85
1	p.L47P	c.140T>C	chr1:41249905	ClinVar and HGMD	22	CCCAGGGGGCCGAGGCGGCG	34.476	40.593	11.502	12.697	3.065	20.333	0	19.08	15.508
1	p.L47P	c.140T>C	chr1:41249905	ClinVar and HGMD	23	GGCGGCTCCCCGCGCCGCCT	33.207	33.512	15.513	33.532	29.421	33.011	21.253	18.88	7.945
1	p.L47P	c.140T>C	chr1:41249905	ClinVar and HGMD	24	GGAGGGGCGCGCCCGGCGGC	30.182	32.975	6.526	31.894	30.231	27.872	30.473	23.498	14.993
1	p.L47P	c.140T>C	chr1:41249905	ClinVar and HGMD	25	GGGCTGCCCAGGGGGCCGAG	29.537	28.411	no_activity	17.563	13.206	10.751	0	24.921	no_activity
1	p.L47P	c.140T>C	chr1:41249905	ClinVar and HGMD	26	CAGGGCGAGGCGGGCGGGGG	27.821	23.514	17.885	1.444	0.106	0	0	17.486	1.011
1	p.L47P	c.140T>C	chr1:41249905	ClinVar and HGMD	27	CGCGCCGCCTCGGCCCCCTG	25.906	16.135	14.031	2.784	1.713	3.66	0	26.458	15.564
1	p.L47P	c.140T>C	chr1:41249905	ClinVar and HGMD	28	GCCGGGCGCGCCCCTCCCTG	22.484	23.073	17.953	20.059	10.079	12.742	3.612	18.449	13.451
1	p.L47P	c.140T>C	chr1:41249905	ClinVar and HGMD	29	AGGGGGCTGCCCAGGGGGCC	22.317	23.072	3.14	14.744	5.561	9.013	0	17.507	9.562
1	p.L47P	c.140T>C	chr1:41249905	ClinVar and HGMD	30	CGGCAGGGGGCTGCCCAGGG	21.044	24.91	16.986	10.239	1.038	8.753	0	10.084	14.174
1	p.L47P	c.140T>C	chr1:41249905	ClinVar and HGMD	31	CGCCGCCTCGGCCCCCTGGG	19.541	20.375	6.263	0	0	0	0	14.064	no_activity
1	p.L47P	c.140T>C	chr1:41249905	ClinVar and HGMD	32	GGGCGCGCCCGGCGGCAGGG	18.229	22.102	8.731	11.456	8.325	6.39	0.856	28.782	25.154
1	p.L47P	c.140T>C	chr1:41249905	ClinVar and HGMD	33	GGGCGGCTCCCCGCGCCGCC	18.12	8.997	3.963	1.27	0	0	0	no_activity	no_activity
1	p.L47P	c.140T>C	chr1:41249905	ClinVar and HGMD	34	GCCGCCGGGCGCGCCCCTCC	18.056	20.476	no_activity	6.088	2.99	3.077	0	12.138	no_activity
1	p.L47P	c.140T>C	chr1:41249905	ClinVar and HGMD	35	GGGGGCCGAGGCGGCGCGGG	15.454	16.025	15.435	12.864	1.577	10.237	0	16.125	6.899
1	p.L47P	c.140T>C	chr1:41249905	ClinVar and HGMD	36	CCCGGCGGCAGGGGGCTGCC	14.861	17.659	0	4.521	0.954	4.585	0	8.891	12.434
1	p.L47P	c.140T>C	chr1:41249905	ClinVar and HGMD	37	CCCAGGGAGGGGCGCGCCCG	14.388	10.115	no_activity	4.832	0	2.351	0	11.38	no_activity
1	p.L47P	c.140T>C	chr1:41249905	ClinVar and HGMD	38	CGGGCGCGCCCCTCCCTGGG	13.684	18.108	4.165	4.275	0	5.793	0	no_activity	no_activity
1	p.L47P	c.140T>C	chr1:41249905	ClinVar and HGMD	39	AGGGGGCCGAGGCGGCGCGG	12.819	8.018	12.549	19.788	9.272	14.341	0.163	32.779	31.216
1	p.L47P	c.140T>C	chr1:41249905	ClinVar and HGMD	40	CCCTGGGCAGCCCCCTGCCG	12.309	8.023	3.163	0	0	0.779	0	no_activity	no_activity
1	p.L47P	c.140T>C	chr1:41249905	ClinVar and HGMD	41	GGGAGGGGCGCGCCCGGCGG	12.184	16.064	10.914	14.713	3.995	9.787	0	18.857	12.003
1	p.L47P	c.140T>C	chr1:41249905	ClinVar and HGMD	42	AACAGGGCGAGGCGGGCGGG	11.789	11.226	7.295	10.315	5.781	7.089	0.247	21.351	16.49
1	p.L47P	c.140T>C	chr1:41249905	ClinVar and HGMD	43	CGGCCCAGGGAGGGGCGCGC	11.504	2.197	0.658	0	0	0	0	no_activity	no_activity
1	p.L47P	c.140T>C	chr1:41249905	ClinVar and HGMD	44	ACAGGGCGAGGCGGGCGGGG	11.303	10.807	no_activity	11.362	2.461	11.21	0	9.799	no_activity
1	p.L47P	c.140T>C	chr1:41249905	ClinVar and HGMD	45	GGGGCTGCCCAGGGGGCCGA	11.217	12.192	1.258	7.043	3.722	4.068	0	28.899	27.806
1	p.L47P	c.140T>C	chr1:41249905	ClinVar and HGMD	46	CCCCGCGCCGCCTCGGCCCC	10.41	9.016	no_activity	0	0	0	0	5.715	no_activity
1	p.L47P	c.140T>C	chr1:41249905	ClinVar and HGMD	47	CAGGGGGCTGCCCAGGGGGC	10.245	9.721	3.056	4.417	0.303	4.916	0	20.469	32.934
1	p.L47P	c.140T>C	chr1:41249905	ClinVar and HGMD	48	TGGGCAGCCCCCTGCCGCCG	10.22	8.859	4.689	3.891	2.226	2.385	0	25.123	32.165
1	p.L47P	c.140T>C	chr1:41249905	ClinVar and HGMD	49	GGGCAGCCCCCTGCCGCCGG	8.707	15.204	no_activity	12.664	6.636	2.997	0	no_activity	no_activity
1	p.L47P	c.140T>C	chr1:41249905	ClinVar and HGMD	50	CGGCCCCCTGGGCAGCCCCC	8.221	9.017	14.36	4.526	0	0	0	23.376	15.675
1	p.L47P	c.140T>C	chr1:41249905	ClinVar and HGMD	51	GGCAGCCCCCTGCCGCCGGG	no_activity	no_activity	8.836	no_activity	no_activity	no_activity	no_activity	31.035	32.464
1	p.L47P	c.140T>C	chr1:41249905	ClinVar and HGMD	52	CGGGCGGGGGCGGCTCCCCG	7.905	9.133	15.156	5.632	0	2.069	0	19.832	6.751
1	p.L47P	c.140T>C	chr1:41249905	ClinVar and HGMD	53	CCCCCTGGGCAGCCCCCTGC	7.236	7.626	12.242	4.059	0.889	1.9	0	4.393	2.542
1	p.L47P	c.140T>C	chr1:41249905	ClinVar and HGMD	54	GCTGCCCAGGGGGCCGAGGC	6.824	8.534	0	2.419	2.138	2.302	0.739	27.476	24.268
1	p.L47P	c.140T>C	chr1:41249905	ClinVar and HGMD	55	GCCCAGGGGGCCGAGGCGGC	5.723	11.308	no_activity	3.534	0	0	0	0	no_activity
1	p.L47P	c.140T>C	chr1:41249905	ClinVar and HGMD	56	GCGGCTCCCCGCGCCGCCTC	4.706	5.886	3.175	3.183	2.472	2.454	1.129	16.77	9.39
1	p.L47P	c.140T>C	chr1:41249905	ClinVar and HGMD	57	CGCGCCCGGCGGCAGGGGGC	4.394	1.05	2.64	3.384	0.616	0	0	8.015	6.752
1	p.L47P	c.140T>C	chr1:41249905	ClinVar and HGMD	58	GGAGCCGCCCCCGCCCGCCT	4.177	7.163	3.483	2.287	3.251	4.961	0.758	7.362	10.209
1	p.L47P	c.140T>C	chr1:41249905	ClinVar and HGMD	59	GCCCAGGGAGGGGCGCGCCC	4.028	4.328	0	6.027	0.442	2.469	0	21.026	14.824
1	p.L47P	c.140T>C	chr1:41249905	ClinVar and HGMD	60	GGGGCCGAGGCGGCGCGGGG	no_activity	no_activity	8.011	no_activity	no_activity	no_activity	no_activity	16.131	2.983
1	p.L47P	c.140T>C	chr1:41249905	ClinVar and HGMD	61	CGCGGGGAGCCGCCCCCGCC	3.555	6.029	5.236	0.997	0.432	0	0	10.897	4.52
1	p.L47P	c.140T>C	chr1:41249905	ClinVar and HGMD	62	GCGCGCCCCTCCCTGGGCCG	3.412	6.784	0.531	4.792	2.72	3.149	0	18.705	10.001
1	p.L47P	c.140T>C	chr1:41249905	ClinVar and HGMD	63	AGGGCGAGGCGGGCGGGGGC	2.514	0	0	0	0	0.059	0	17.367	0
1	p.L47P	c.140T>C	chr1:41249905	ClinVar and HGMD	64	CAGGGAGGGGCGCGCCCGGC	2.455	3.708	0	0	0.239	0	0	5.9	0
1	p.L47P	c.140T>C	chr1:41249905	ClinVar and HGMD	65	GCGGCGCGGGGAGCCGCCCC	2.221	0.718	10.982	4.691	1.89	2.921	0.058	13.162	9.72
1	p.L47P	c.140T>C	chr1:41249905	ClinVar and HGMD	66	GGCGCGCCCGGCGGCAGGGG	no_activity	no_activity	no_activity	no_activity	no_activity	no_activity	no_activity	11.215	no_activity
1	p.L47P	c.140T>C	chr1:41249905	ClinVar and HGMD	67	GCGCCGCCTCGGCCCCCTGG	no_activity	no_activity	no_activity	no_activity	no_activity	no_activity	no_activity	17.814	14.777
1	p.L47P	c.140T>C	chr1:41249905	ClinVar and HGMD	68	GCCGCCTCGGCCCCCTGGGC	no_activity	no_activity	0	no_activity	no_activity	no_activity	no_activity	11.009	4.794
1	p.L47P	c.140T>C	chr1:41249905	ClinVar and HGMD	69	GCCGAGGCGGCGCGGGGAGC	1.998	2.37	3.269	0.408	0.517	1.007	0.951	10.759	6.697
1	p.L47P	c.140T>C	chr1:41249905	ClinVar and HGMD	70	TGCCCAGGGGGCCGAGGCGG	no_activity	no_activity	1.037	no_activity	no_activity	no_activity	no_activity	12.116	16.092
1	p.L47P	c.140T>C	chr1:41249905	ClinVar and HGMD	71	CTGCCCAGGGGGCCGAGGCG	1.48	8.441	no_activity	1.079	0	0	0	no_activity	no_activity
1	p.L47P	c.140T>C	chr1:41249905	ClinVar and HGMD	72	GGCGGGCGGGGGCGGCTCCC	no_activity	no_activity	8.679	no_activity	no_activity	no_activity	no_activity	31.345	28.846
1	p.L47P	c.140T>C	chr1:41249905	ClinVar and HGMD	73	CGCCCCCGCCCGCCTCGCCC	no_activity	no_activity	11.49	no_activity	no_activity	no_activity	no_activity	28.906	14.973
1	p.L47P	c.140T>C	chr1:41249905	ClinVar and HGMD	74	GCGCGCCCGGCGGCAGGGGG	0.885	4.403	no_activity	0.966	0.262	0	0	no_activity	no_activity
1	p.L47P	c.140T>C	chr1:41249905	ClinVar and HGMD	75	TCGGCCCCCTGGGCAGCCCC	0.859	3.454	no_activity	0.918	0.155	0	0	no_activity	no_activity
1	p.L47P	c.140T>C	chr1:41249905	ClinVar and HGMD	76	GCGGGGGCGGCTCCCCGCGC	0.832	4.523	2.906	1.37	1.41	3.717	0.011	12.745	2.464
1	p.L47P	c.140T>C	chr1:41249905	ClinVar and HGMD	77	CAGCCCCCTGCCGCCGGGCG	0.652	0.641	3.729	0	0	0	0	9.964	6.132
1	p.L47P	c.140T>C	chr1:41249905	ClinVar and HGMD	78	CCGCCCCCGCCCGCCTCGCC	no_activity	no_activity	no_activity	no_activity	no_activity	no_activity	no_activity	0	no_activity
1	p.L47P	c.140T>C	chr1:41249905	ClinVar and HGMD	79	GGGGCGGCTCCCCGCGCCGC	no_activity	no_activity	no_activity	no_activity	no_activity	no_activity	no_activity	0	no_activity
1	p.L47P	c.140T>C	chr1:41249905	ClinVar and HGMD	80	GGGGAGCCGCCCCCGCCCGC	no_activity	no_activity	no_activity	no_activity	no_activity	no_activity	no_activity	8.019	no_activity
1	p.L47P	c.140T>C	chr1:41249905	ClinVar and HGMD	81	AGGGAGGGGCGCGCCCGGCG	no_activity	no_activity	no_activity	no_activity	no_activity	no_activity	no_activity	0	8.026
1	p.L47P	c.140T>C	chr1:41249905	ClinVar and HGMD	82	GCGGGCGGGGGCGGCTCCCC	0	0	no_activity	4.027	0.859	1.932	0	no_activity	no_activity
1	p.L47P	c.140T>C	chr1:41249905	ClinVar and HGMD	83	GCCCGGCGGCAGGGGGCTGC	no_activity	no_activity	no_activity	no_activity	no_activity	no_activity	no_activity	no_activity	3.253
1	p.L47P	c.140T>C	chr1:41249905	ClinVar and HGMD	84	GCAGCCCCCTGCCGCCGGGC	0	0.13	no_activity	1.168	2.37	1.306	0	no_activity	no_activity
2	p.Q71Sfs*68	c.211del	chr1:41249975	ClinVar and HGMD	1	CCGCCTGCGGCAGCGCTCCT	51.969	51.976	37.364	7.887	0	10.411	0	29.505	21.872
2	p.Q71Sfs*68	c.211del	chr1:41249975	ClinVar and HGMD	2	CGGCCGAGGAGCGCTGCCGC	49.777	46.132	20.695	32.277	0.599	17.904	0	9.75	3.36
2	p.Q71Sfs*68	c.211del	chr1:41249975	ClinVar and HGMD	3	TCCGGCTCGGGCTCCGCCTG	45.074	45.774	23.134	17.812	3.92	26.575	3.442	17.842	12.797
2	p.Q71Sfs*68	c.211del	chr1:41249975	ClinVar and HGMD	4	CCGAGGAGCGCTGCCGCAGG	44.962	45.962	24.636	2.845	0.678	22.41	0	30.424	29.957
2	p.Q71Sfs*68	c.211del	chr1:41249975	ClinVar and HGMD	5	GCCGCAGGCGGAGCCCGAGC	43.379	42.484	22.159	36.547	30.802	37.882	27.945	29.632	28.185
2	p.Q71Sfs*68	c.211del	chr1:41249975	ClinVar and HGMD	6	AGCGCTCCTCGGCCGCGCAC	29.297	33.428	16.746	16.191	7.401	5.592	0	16.516	no_activity
2	p.Q71Sfs*68	c.211del	chr1:41249975	ClinVar and HGMD	7	GCCGAGGAGCGCTGCCGCAG	24.755	21.208	no_activity	14.573	6.647	9.082	17.048	6.898	no_activity
2	p.Q71Sfs*68	c.211del	chr1:41249975	ClinVar and HGMD	8	GGCTCGGGCTCCGCCTGCGG	24.519	25.381	15.764	15.809	15.776	10.109	0.641	16.263	no_activity
2	p.Q71Sfs*68	c.211del	chr1:41249975	ClinVar and HGMD	9	GGCCGAGGAGCGCTGCCGCA	23.509	20.453	6.959	10.09	0	1.272	0.05	42.15	39.982
2	p.Q71Sfs*68	c.211del	chr1:41249975	ClinVar and HGMD	10	GAGGAGCGCTGCCGCAGGCG	21.785	28.595	18.499	20.714	11.955	11.181	0.995	20.597	7.985
2	p.Q71Sfs*68	c.211del	chr1:41249975	ClinVar and HGMD	11	TCCGCCTGCGGCAGCGCTCC	20.116	7.445	4.154	0.383	0	0	0	no_activity	no_activity
2	p.Q71Sfs*68	c.211del	chr1:41249975	ClinVar and HGMD	12	CGAGGAGCGCTGCCGCAGGC	19.129	14.393	8.547	1.562	0	0.637	0	41.704	51.43
2	p.Q71Sfs*68	c.211del	chr1:41249975	ClinVar and HGMD	13	GCGGCCGAGGAGCGCTGCCG	18.56	20.12	4.223	10.788	1.359	8.672	0	25.844	3.584
2	p.Q71Sfs*68	c.211del	chr1:41249975	ClinVar and HGMD	14	CGCAGGCGGAGCCCGAGCCG	18.064	21.672	9.79	10.551	0	9.235	0	16.983	12.088
2	p.Q71Sfs*68	c.211del	chr1:41249975	ClinVar and HGMD	15	TGCCGCAGGCGGAGCCCGAG	17.912	13.228	1.408	0.036	0	0	0	no_activity	no_activity
2	p.Q71Sfs*68	c.211del	chr1:41249975	ClinVar and HGMD	16	CTCCGGCTCGGGCTCCGCCT	16.66	14.715	no_activity	0	0	0	0	7.454	no_activity
2	p.Q71Sfs*68	c.211del	chr1:41249975	ClinVar and HGMD	17	CGCTGCCGCAGGCGGAGCCC	14.335	15.164	16.208	3.401	0	0	0	9.65	2.175
2	p.Q71Sfs*68	c.211del	chr1:41249975	ClinVar and HGMD	18	CGCCTGCGGCAGCGCTCCTC	11.379	9	13.646	4.212	0.605	2.291	0.045	14.767	9.675
2	p.Q71Sfs*68	c.211del	chr1:41249975	ClinVar and HGMD	19	CGCTCCTCGGCCGCGCACAA	9.842	13.212	no_activity	0	0	0	0	no_activity	no_activity
2	p.Q71Sfs*68	c.211del	chr1:41249975	ClinVar and HGMD	20	GCGCTGCCGCAGGCGGAGCC	9.695	9.745	3.6	2.278	0.25	0	0.558	32.444	44.919
2	p.Q71Sfs*68	c.211del	chr1:41249975	ClinVar and HGMD	21	CCGCAGGCGGAGCCCGAGCC	9.561	11.886	3.546	0	0	0	0	33.36	43.602
2	p.Q71Sfs*68	c.211del	chr1:41249975	ClinVar and HGMD	22	AGGAGCGCTGCCGCAGGCGG	no_activity	no_activity	13.461	no_activity	no_activity	no_activity	no_activity	19.577	15.328
2	p.Q71Sfs*68	c.211del	chr1:41249975	ClinVar and HGMD	23	GCTGCCGCAGGCGGAGCCCG	no_activity	no_activity	6.603	no_activity	no_activity	no_activity	no_activity	5.061	6.75
2	p.Q71Sfs*68	c.211del	chr1:41249975	ClinVar and HGMD	24	CCGGCTCGGGCTCCGCCTGC	5.101	2.696	5.409	0	0	0	0	22.728	8.969
2	p.Q71Sfs*68	c.211del	chr1:41249975	ClinVar and HGMD	25	GCAGGCGGAGCCCGAGCCGG	no_activity	no_activity	10.708	no_activity	no_activity	no_activity	no_activity	15.6	15.315
2	p.Q71Sfs*68	c.211del	chr1:41249975	ClinVar and HGMD	26	GCGCTCCTCGGCCGCGCACA	no_activity	no_activity	2.488	no_activity	no_activity	no_activity	no_activity	41.65	35.491
2	p.Q71Sfs*68	c.211del	chr1:41249975	ClinVar and HGMD	27	TGTGCGCGGCCGAGGAGCGC	3.203	3.807	7.53	2.67	0.006	0.679	0	11.658	5.009
2	p.Q71Sfs*68	c.211del	chr1:41249975	ClinVar and HGMD	28	GCTCGGGCTCCGCCTGCGGC	no_activity	no_activity	0.061	no_activity	no_activity	no_activity	no_activity	27.583	21.388
2	p.Q71Sfs*68	c.211del	chr1:41249975	ClinVar and HGMD	29	TTGTGCGCGGCCGAGGAGCG	2.474	8.2	no_activity	0	0	0	0	no_activity	no_activity
2	p.Q71Sfs*68	c.211del	chr1:41249975	ClinVar and HGMD	30	GCCCGGCCCAGGGAGGGGCG	2.461	1.773	4.361	2.636	1.431	0	0	6.652	4.637
2	p.Q71Sfs*68	c.211del	chr1:41249975	ClinVar and HGMD	31	CTGCGGCAGCGCTCCTCGGC	no_activity	no_activity	2.339	no_activity	no_activity	no_activity	no_activity	27.529	29.54
2	p.Q71Sfs*68	c.211del	chr1:41249975	ClinVar and HGMD	32	GCGGCAGCGCTCCTCGGCCG	no_activity	no_activity	10.367	no_activity	no_activity	no_activity	no_activity	23.095	22.512
2	p.Q71Sfs*68	c.211del	chr1:41249975	ClinVar and HGMD	33	GCTTGTGCGCGGCCGAGGAG	no_activity	no_activity	9.307	no_activity	no_activity	no_activity	no_activity	23.852	12.65
2	p.Q71Sfs*68	c.211del	chr1:41249975	ClinVar and HGMD	34	TCGGGCTCCGCCTGCGGCAG	no_activity	no_activity	3.86	no_activity	no_activity	no_activity	no_activity	23.315	12.484
2	p.Q71Sfs*68	c.211del	chr1:41249975	ClinVar and HGMD	35	TGCGGCAGCGCTCCTCGGCC	1.454	0	no_activity	0	0	0	0	no_activity	no_activity
2	p.Q71Sfs*68	c.211del	chr1:41249975	ClinVar and HGMD	36	GCGCGGCCGAGGAGCGCTGC	no_activity	no_activity	1.379	no_activity	no_activity	no_activity	no_activity	11.716	4.563
2	p.Q71Sfs*68	c.211del	chr1:41249975	ClinVar and HGMD	37	CTCGGGCTCCGCCTGCGGCA	0.742	8.228	no_activity	0.406	0	0	0	no_activity	no_activity
2	p.Q71Sfs*68	c.211del	chr1:41249975	ClinVar and HGMD	38	CTTGTGCGCGGCCGAGGAGC	no_activity	no_activity	no_activity	no_activity	no_activity	no_activity	no_activity	8.59	no_activity
2	p.Q71Sfs*68	c.211del	chr1:41249975	ClinVar and HGMD	39	CGGCTCGGGCTCCGCCTGCG	no_activity	no_activity	no_activity	no_activity	no_activity	no_activity	no_activity	6.705	14.471
2	p.Q71Sfs*68	c.211del	chr1:41249975	ClinVar and HGMD	40	GGCAGCGCTCCTCGGCCGCG	no_activity	no_activity	no_activity	no_activity	no_activity	no_activity	no_activity	1.355	no_activity
2	p.Q71Sfs*68	c.211del	chr1:41249975	ClinVar and HGMD	41	CGCGGCCGAGGAGCGCTGCC	no_activity	no_activity	no_activity	no_activity	no_activity	no_activity	no_activity	3.115	0
2	p.Q71Sfs*68	c.211del	chr1:41249975	ClinVar and HGMD	42	CTCCGCCTGCGGCAGCGCTC	no_activity	no_activity	no_activity	no_activity	no_activity	no_activity	no_activity	0.289	no_activity
2	p.Q71Sfs*68	c.211del	chr1:41249975	ClinVar and HGMD	43	CAGCGCTCCTCGGCCGCGCA	no_activity	no_activity	no_activity	no_activity	no_activity	no_activity	no_activity	16.476	22.539
3	p.Q71Pfs*64	c.212_224del	chr1:41249976-41249988	ClinVar and HGMD	1	GCGGCGGTAGCGCTTGTGCG	55.912	52.968	37.59	49.822	46.036	44.777	8.216	50.552	40.423
3	p.Q71Pfs*64	c.212_224del	chr1:41249976-41249988	ClinVar and HGMD	2	CGGCGGTAGCGCTTGTGCGC	51.273	46.407	23.151	43.978	33.904	38.544	8.284	21.723	8.233
3	p.Q71Pfs*64	c.212_224del	chr1:41249976-41249988	ClinVar and HGMD	3	GCCGGAGCCCGGCCCAGGGA	50.101	46.207	31.172	43.457	42.083	41.755	17.528	36.067	30.916
3	p.Q71Pfs*64	c.212_224del	chr1:41249976-41249988	ClinVar and HGMD	4	AGCCGGAGCCCGGCCCAGGG	48.123	43.971	20.151	42.931	38.611	37.864	11.091	29.894	30.089
3	p.Q71Pfs*64	c.212_224del	chr1:41249976-41249988	ClinVar and HGMD	5	CCGGAGCCCGGCCCAGGGAG	47.421	45.365	30.068	9.432	2.372	15.347	0	33.487	32.61
3	p.Q71Pfs*64	c.212_224del	chr1:41249976-41249988	ClinVar and HGMD	6	CCGAGCCGGAGCCCGGCCCA	46.168	46.924	13.642	11.22	0	18.609	0	19.506	32.218
3	p.Q71Pfs*64	c.212_224del	chr1:41249976-41249988	ClinVar and HGMD	7	GCCGCAGGCGGAGCCCGAGC	44.009	43.174	20.796	37.438	34.033	40.377	33.486	30.939	29.85
3	p.Q71Pfs*64	c.212_224del	chr1:41249976-41249988	ClinVar and HGMD	8	AGCGCTTGTGCGCGGGCCGC	42.057	39.383	21.099	34.467	32.797	31.719	2.884	10.523	4.649
3	p.Q71Pfs*64	c.212_224del	chr1:41249976-41249988	ClinVar and HGMD	9	CCCGAGCCGGAGCCCGGCCC	41.739	37.111	15.086	25.243	7.799	28.796	0.785	26.844	24.418
3	p.Q71Pfs*64	c.212_224del	chr1:41249976-41249988	ClinVar and HGMD	10	GCTTGTGCGCGGGCCGCAGG	40.297	41.895	22.714	36.809	36.575	32.873	12.388	32.346	24.61
3	p.Q71Pfs*64	c.212_224del	chr1:41249976-41249988	ClinVar and HGMD	11	CCCTGGGCCGGGCTCCGGCT	40.118	35.628	16.048	24.796	2.961	28.718	0	23.354	17.347
3	p.Q71Pfs*64	c.212_224del	chr1:41249976-41249988	ClinVar and HGMD	12	TCCGGCTCGGGCTCCGCCTG	38.589	41.403	16.726	11.915	2.669	21.346	1.975	24.802	19.791
3	p.Q71Pfs*64	c.212_224del	chr1:41249976-41249988	ClinVar and HGMD	13	GCGGAGCCCGAGCCGGAGCC	37.476	36.676	20.847	31.698	20.866	9.005	1.027	25.799	21.324
3	p.Q71Pfs*64	c.212_224del	chr1:41249976-41249988	ClinVar and HGMD	14	CCCCTCCCTGGGCCGGGCTC	35.419	36.434	21.21	17.472	6.068	13.16	0	15.479	3.685
3	p.Q71Pfs*64	c.212_224del	chr1:41249976-41249988	ClinVar and HGMD	15	CCTGGGCCGGGCTCCGGCTC	34.733	37.91	18.854	33.33	21.544	32.076	3.121	20.868	9.971
3	p.Q71Pfs*64	c.212_224del	chr1:41249976-41249988	ClinVar and HGMD	16	GAGCCGGAGCCCGGCCCAGG	31.229	36.507	17.419	27.275	24.792	24.141	21.4	22.912	30.364
3	p.Q71Pfs*64	c.212_224del	chr1:41249976-41249988	ClinVar and HGMD	17	GGCGGCGGTAGCGCTTGTGC	25.479	11.93	no_activity	4.71	0.76	0.126	0	7.189	no_activity
3	p.Q71Pfs*64	c.212_224del	chr1:41249976-41249988	ClinVar and HGMD	18	CGAGCCGGAGCCCGGCCCAG	24.824	23.762	11.589	23.282	4.106	16.012	0	29.072	49.533
3	p.Q71Pfs*64	c.212_224del	chr1:41249976-41249988	ClinVar and HGMD	19	CTTGTGCGCGGGCCGCAGGC	19.663	16.272	12.223	10.151	2.892	5.254	0.033	41.027	47.559
3	p.Q71Pfs*64	c.212_224del	chr1:41249976-41249988	ClinVar and HGMD	20	GGCCGCAGGCGGAGCCCGAG	18.939	21.019	2.657	6.613	0	0	0	no_activity	no_activity
3	p.Q71Pfs*64	c.212_224del	chr1:41249976-41249988	ClinVar and HGMD	21	TCCGCCTGCGGCCCGCGCAC	17.747	26.793	11.525	6.328	1.385	4.425	0	14.882	no_activity
3	p.Q71Pfs*64	c.212_224del	chr1:41249976-41249988	ClinVar and HGMD	22	CGCAGGCGGAGCCCGAGCCG	16.882	18.792	9.111	8.617	0	8.5	0	16.51	9.308
3	p.Q71Pfs*64	c.212_224del	chr1:41249976-41249988	ClinVar and HGMD	23	TAGCGCTTGTGCGCGGGCCG	16.56	20.894	0	0	0	0	0	14.881	3.224
3	p.Q71Pfs*64	c.212_224del	chr1:41249976-41249988	ClinVar and HGMD	24	GGCGGAGCCCGAGCCGGAGC	16.013	14.026	5.322	4.167	0.549	0	0	no_activity	no_activity
3	p.Q71Pfs*64	c.212_224del	chr1:41249976-41249988	ClinVar and HGMD	25	CGCTTGTGCGCGGGCCGCAG	15.769	15.826	no_activity	0	0	0	0	1.065	no_activity
3	p.Q71Pfs*64	c.212_224del	chr1:41249976-41249988	ClinVar and HGMD	26	CGCACAAGCGCTACCGCCGC	14.704	5.484	no_activity	0	0.241	0	0	no_activity	no_activity
3	p.Q71Pfs*64	c.212_224del	chr1:41249976-41249988	ClinVar and HGMD	27	CGGAGCCCGGCCCAGGGAGG	14.186	14.963	10.428	1.997	0.124	4.27	0	19.54	25.975
3	p.Q71Pfs*64	c.212_224del	chr1:41249976-41249988	ClinVar and HGMD	28	GCCCGAGCCGGAGCCCGGCC	13.784	12.793	0	0.847	0	0	0	3.304	7.709
3	p.Q71Pfs*64	c.212_224del	chr1:41249976-41249988	ClinVar and HGMD	29	GCGCTTGTGCGCGGGCCGCA	13.582	12.82	2.175	1.799	0	0	0.467	26.952	28.904
3	p.Q71Pfs*64	c.212_224del	chr1:41249976-41249988	ClinVar and HGMD	30	TCCCTGGGCCGGGCTCCGGC	12.752	10.368	0.109	3.902	0	2.405	0	no_activity	no_activity
3	p.Q71Pfs*64	c.212_224del	chr1:41249976-41249988	ClinVar and HGMD	31	TTGTGCGCGGGCCGCAGGCG	11.943	17.969	4.748	0	0	1.148	0	12.077	16.023
3	p.Q71Pfs*64	c.212_224del	chr1:41249976-41249988	ClinVar and HGMD	32	CGCCTGCGGCCCGCGCACAA	10.811	13.002	no_activity	0	0	0	0	no_activity	no_activity
3	p.Q71Pfs*64	c.212_224del	chr1:41249976-41249988	ClinVar and HGMD	33	CTGGGCCGGGCTCCGGCTCG	10.154	12.443	8.646	1.261	0	0	0	25.737	12.62
3	p.Q71Pfs*64	c.212_224del	chr1:41249976-41249988	ClinVar and HGMD	34	GGCGGTAGCGCTTGTGCGCG	9.875	8.895	12.473	5.232	0.378	0.095	1.004	14.915	5.432
3	p.Q71Pfs*64	c.212_224del	chr1:41249976-41249988	ClinVar and HGMD	35	AGGCGGCGGTAGCGCTTGTG	no_activity	no_activity	4.52	no_activity	no_activity	no_activity	no_activity	36.582	40.17
3	p.Q71Pfs*64	c.212_224del	chr1:41249976-41249988	ClinVar and HGMD	36	GGAGCCCGGCCCAGGGAGGG	9.05	18.032	no_activity	12.784	4.991	5.361	0	no_activity	no_activity
3	p.Q71Pfs*64	c.212_224del	chr1:41249976-41249988	ClinVar and HGMD	37	GGCCCGCGCACAAGCGCTAC	8.937	5.296	13.149	2.64	0	0	0.284	19.182	8.364
3	p.Q71Pfs*64	c.212_224del	chr1:41249976-41249988	ClinVar and HGMD	38	GCGGGCCGCAGGCGGAGCCC	8.906	10.652	6.878	12.975	3.074	7.436	0	11.619	0.34
3	p.Q71Pfs*64	c.212_224del	chr1:41249976-41249988	ClinVar and HGMD	39	CCGCAGGCGGAGCCCGAGCC	7.812	10.112	0	0	0	0	0.017	33.458	44.128
3	p.Q71Pfs*64	c.212_224del	chr1:41249976-41249988	ClinVar and HGMD	40	CCGGCTCGGGCTCCGCCTGC	7.508	7.757	6.761	0	0	0	0	13.536	5.235
3	p.Q71Pfs*64	c.212_224del	chr1:41249976-41249988	ClinVar and HGMD	41	GCCTGCGGCCCGCGCACAAG	no_activity	no_activity	8.284	no_activity	no_activity	no_activity	no_activity	33.422	15.62
3	p.Q71Pfs*64	c.212_224del	chr1:41249976-41249988	ClinVar and HGMD	42	CGCGGGCCGCAGGCGGAGCC	6.311	6.136	3.753	0.652	0	0	0	23.772	38.922
3	p.Q71Pfs*64	c.212_224del	chr1:41249976-41249988	ClinVar and HGMD	43	CCGCGCACAAGCGCTACCGC	6.151	4.456	6.586	0.577	0	0	0	9.067	0.535
3	p.Q71Pfs*64	c.212_224del	chr1:41249976-41249988	ClinVar and HGMD	44	GGCTCCGGCTCGGGCTCCGC	6.145	6.676	no_activity	4.368	2.577	1.565	0	no_activity	no_activity
3	p.Q71Pfs*64	c.212_224del	chr1:41249976-41249988	ClinVar and HGMD	45	GCCCCTCCCTGGGCCGGGCT	6.102	4.047	0	0	0	0	0	no_activity	no_activity
3	p.Q71Pfs*64	c.212_224del	chr1:41249976-41249988	ClinVar and HGMD	46	GAGCCCGGCCCAGGGAGGGG	no_activity	no_activity	5.607	no_activity	no_activity	no_activity	no_activity	19.59	25.71
3	p.Q71Pfs*64	c.212_224del	chr1:41249976-41249988	ClinVar and HGMD	47	CGGGCCGCAGGCGGAGCCCG	no_activity	no_activity	4.717	no_activity	no_activity	no_activity	no_activity	1.311	0
3	p.Q71Pfs*64	c.212_224del	chr1:41249976-41249988	ClinVar and HGMD	48	GCTCCGGCTCGGGCTCCGCC	no_activity	no_activity	no_activity	no_activity	no_activity	no_activity	no_activity	35.981	27.501
3	p.Q71Pfs*64	c.212_224del	chr1:41249976-41249988	ClinVar and HGMD	49	CCGCCTGCGGCCCGCGCACA	no_activity	no_activity	1.262	no_activity	no_activity	no_activity	no_activity	33.937	33.214
3	p.Q71Pfs*64	c.212_224del	chr1:41249976-41249988	ClinVar and HGMD	50	CGGGCTCCGCCTGCGGCCCG	no_activity	no_activity	6.214	no_activity	no_activity	no_activity	no_activity	20.295	23.526
3	p.Q71Pfs*64	c.212_224del	chr1:41249976-41249988	ClinVar and HGMD	51	TGTGCGCGGGCCGCAGGCGG	no_activity	no_activity	11.385	no_activity	no_activity	no_activity	no_activity	11.57	8.951
3	p.Q71Pfs*64	c.212_224del	chr1:41249976-41249988	ClinVar and HGMD	52	CCGGGCTCCGGCTCGGGCTC	2.407	5.986	7.01	0.427	0	0	0	1.089	1.963
3	p.Q71Pfs*64	c.212_224del	chr1:41249976-41249988	ClinVar and HGMD	53	AGCCCGGCCCAGGGAGGGGC	2.341	8.404	no_activity	1.553	0	1.201	0	no_activity	no_activity
3	p.Q71Pfs*64	c.212_224del	chr1:41249976-41249988	ClinVar and HGMD	54	CCCTCCCTGGGCCGGGCTCC	2.307	4.687	8.32	1.96	0	0	0	12.354	11.487
3	p.Q71Pfs*64	c.212_224del	chr1:41249976-41249988	ClinVar and HGMD	55	CTCGGGCTCCGCCTGCGGCC	no_activity	no_activity	3.874	no_activity	no_activity	no_activity	no_activity	23	32.944
3	p.Q71Pfs*64	c.212_224del	chr1:41249976-41249988	ClinVar and HGMD	56	CGGAGCCCGAGCCGGAGCCC	1.728	5.963	8.629	0.234	0	0.383	0	4.316	5.324
3	p.Q71Pfs*64	c.212_224del	chr1:41249976-41249988	ClinVar and HGMD	57	GGTAGCGCTTGTGCGCGGGC	no_activity	no_activity	1.939	no_activity	no_activity	no_activity	no_activity	9.005	12.597
3	p.Q71Pfs*64	c.212_224del	chr1:41249976-41249988	ClinVar and HGMD	58	TCGGGCTCCGCCTGCGGCCC	1.054	0.599	no_activity	0	0	0	0	no_activity	no_activity
3	p.Q71Pfs*64	c.212_224del	chr1:41249976-41249988	ClinVar and HGMD	59	GTAGCGCTTGTGCGCGGGCC	no_activity	no_activity	no_activity	no_activity	no_activity	no_activity	no_activity	0	3.622
3	p.Q71Pfs*64	c.212_224del	chr1:41249976-41249988	ClinVar and HGMD	60	AGCCCGAGCCGGAGCCCGGC	no_activity	no_activity	no_activity	no_activity	no_activity	no_activity	no_activity	no_activity	4.36
3	p.Q71Pfs*64	c.212_224del	chr1:41249976-41249988	ClinVar and HGMD	61	GGCTCCGCCTGCGGCCCGCG	no_activity	no_activity	no_activity	no_activity	no_activity	no_activity	no_activity	0	no_activity
3	p.Q71Pfs*64	c.212_224del	chr1:41249976-41249988	ClinVar and HGMD	62	CTCCCTGGGCCGGGCTCCGG	no_activity	no_activity	no_activity	no_activity	no_activity	no_activity	no_activity	0	no_activity
3	p.Q71Pfs*64	c.212_224del	chr1:41249976-41249988	ClinVar and HGMD	63	CTCCGCCTGCGGCCCGCGCA	no_activity	no_activity	no_activity	no_activity	no_activity	no_activity	no_activity	24.486	20.254
4	p.H77Rfs*63	c.228_229dup	chr1:41249989-41249990	ClinVar and HGMD	1	CTACCGCCGCCTGCAGAACT	61.656	56.2	46.133	34.316	39.112	40.229	0.581	44.585	38.422
4	p.H77Rfs*63	c.228_229dup	chr1:41249989-41249990	ClinVar and HGMD	2	AGACCCAGTTCTGCAGGCGG	54.705	52.424	35.422	54.005	56.742	50.933	9.417	33.854	28.933
4	p.H77Rfs*63	c.228_229dup	chr1:41249989-41249990	ClinVar and HGMD	3	CGCCTGCGGCCAGCGCTCCT	54.223	54.845	42.429	34.476	10.158	40.354	1.442	31.15	21.285
4	p.H77Rfs*63	c.228_229dup	chr1:41249989-41249990	ClinVar and HGMD	4	TGTAGACCCAGTTCTGCAGG	52.115	46.794	37.883	24.652	28.491	22.903	0.973	22.034	6.452
4	p.H77Rfs*63	c.228_229dup	chr1:41249989-41249990	ClinVar and HGMD	5	CGTTGTAGACCCAGTTCTGC	51.83	44.914	32.409	22.417	3.28	21.291	0.209	25.103	17.371
4	p.H77Rfs*63	c.228_229dup	chr1:41249989-41249990	ClinVar and HGMD	6	GAACTGGGTCTACAACGTGC	51.523	48.155	29.901	47.642	49.625	43.161	38.476	38.205	33.602
4	p.H77Rfs*63	c.228_229dup	chr1:41249989-41249990	ClinVar and HGMD	7	GGCGGTAGCGCTTGTGCGCG	47.185	47.402	28.694	40.022	23.257	13.562	3.584	18.225	13.739
4	p.H77Rfs*63	c.228_229dup	chr1:41249989-41249990	ClinVar and HGMD	8	CGAGGAGCGCTGGCCGCAGG	47.111	47.826	29.366	19.421	3.071	29.482	0	34.409	23.118
4	p.H77Rfs*63	c.228_229dup	chr1:41249989-41249990	ClinVar and HGMD	9	TGCGCGCGGCCGAGGAGCGC	47.065	43.604	25.363	34.538	32.128	35.314	3.985	20.661	13.448
4	p.H77Rfs*63	c.228_229dup	chr1:41249989-41249990	ClinVar and HGMD	10	GCTACCGCCGCCTGCAGAAC	45.422	43.637	16.554	39.639	33.164	22.353	14.024	34.643	20.205
4	p.H77Rfs*63	c.228_229dup	chr1:41249989-41249990	ClinVar and HGMD	11	GGCCGAGGAGCGCTGGCCGC	45.386	45.454	27.937	41.121	24.424	23.743	12.169	20.136	7.526
4	p.H77Rfs*63	c.228_229dup	chr1:41249989-41249990	ClinVar and HGMD	12	GCCGCAGGCGGAGCCCGAGC	45.006	42.913	20.621	36.685	33.026	40.343	31.95	30.699	28.19
4	p.H77Rfs*63	c.228_229dup	chr1:41249989-41249990	ClinVar and HGMD	13	TCCGGCTCGGGCTCCGCCTG	40.156	41.633	17.509	13.381	3.116	21.111	1.893	23.804	22.335
4	p.H77Rfs*63	c.228_229dup	chr1:41249989-41249990	ClinVar and HGMD	14	AGCGCTTGTGCGCGCGGCCG	38.897	36.439	17.244	28.302	20.782	26.964	1.612	28.941	25.271
4	p.H77Rfs*63	c.228_229dup	chr1:41249989-41249990	ClinVar and HGMD	15	AACTGGGTCTACAACGTGCT	36.4	32.795	24.976	10.361	10.847	2.661	2.275	48.235	52.788
4	p.H77Rfs*63	c.228_229dup	chr1:41249989-41249990	ClinVar and HGMD	16	ACTGGGTCTACAACGTGCTG	35.932	34.858	24.25	30.851	23.626	22.596	0.85	17.961	13.766
4	p.H77Rfs*63	c.228_229dup	chr1:41249989-41249990	ClinVar and HGMD	17	ACGTTGTAGACCCAGTTCTG	35.088	32.659	25.347	30	19.796	27.036	3.189	37.663	18.996
4	p.H77Rfs*63	c.228_229dup	chr1:41249989-41249990	ClinVar and HGMD	18	GCAGAACTGGGTCTACAACG	no_activity	no_activity	38.456	no_activity	no_activity	no_activity	no_activity	45.088	49.948
4	p.H77Rfs*63	c.228_229dup	chr1:41249989-41249990	ClinVar and HGMD	19	GTTGTAGACCCAGTTCTGCA	31.795	30.502	25.736	35.876	30.13	17.308	4.089	60.123	59.008
4	p.H77Rfs*63	c.228_229dup	chr1:41249989-41249990	ClinVar and HGMD	20	TTGTAGACCCAGTTCTGCAG	30.776	15.756	no_activity	0.272	0.483	1.556	0	19.566	no_activity
4	p.H77Rfs*63	c.228_229dup	chr1:41249989-41249990	ClinVar and HGMD	21	AGAACTGGGTCTACAACGTG	28.403	28.01	no_activity	8.254	2.64	2.783	0	23.662	no_activity
4	p.H77Rfs*63	c.228_229dup	chr1:41249989-41249990	ClinVar and HGMD	22	CGCTTGTGCGCGCGGCCGAG	27.466	32.983	22.919	6.695	0	5.99	0	20.966	19.111
4	p.H77Rfs*63	c.228_229dup	chr1:41249989-41249990	ClinVar and HGMD	23	GAGGAGCGCTGGCCGCAGGC	24.527	22.108	15.922	18.944	7.502	4.47	2.591	43.603	52.21
4	p.H77Rfs*63	c.228_229dup	chr1:41249989-41249990	ClinVar and HGMD	24	AGCACGTTGTAGACCCAGTT	24.456	24.711	no_activity	0	0	0	0	no_activity	no_activity
4	p.H77Rfs*63	c.228_229dup	chr1:41249989-41249990	ClinVar and HGMD	25	CGCTCCTCGGCCGCGCGCAC	21.428	21.19	9.167	1.553	0	0	0	5.289	no_activity
4	p.H77Rfs*63	c.228_229dup	chr1:41249989-41249990	ClinVar and HGMD	26	CGGCCGAGGAGCGCTGGCCG	20.788	17.086	4.601	1.435	0	0	0	21.886	6.75
4	p.H77Rfs*63	c.228_229dup	chr1:41249989-41249990	ClinVar and HGMD	27	TACCGCCGCCTGCAGAACTG	no_activity	no_activity	36.539	no_activity	no_activity	no_activity	no_activity	35.17	no_activity
4	p.H77Rfs*63	c.228_229dup	chr1:41249989-41249990	ClinVar and HGMD	28	CCGCCTGCGGCCAGCGCTCC	20.009	7.311	1.591	0.364	0	0	0	no_activity	no_activity
4	p.H77Rfs*63	c.228_229dup	chr1:41249989-41249990	ClinVar and HGMD	29	CCGAGGAGCGCTGGCCGCAG	19.903	17.587	no_activity	0	0	0	0	5.145	no_activity
4	p.H77Rfs*63	c.228_229dup	chr1:41249989-41249990	ClinVar and HGMD	30	GGCCGCAGGCGGAGCCCGAG	18.951	21.476	1.664	5.379	0	0	0	no_activity	no_activity
4	p.H77Rfs*63	c.228_229dup	chr1:41249989-41249990	ClinVar and HGMD	31	AGGAGCGCTGGCCGCAGGCG	18.655	23.557	9.18	10.941	7.962	14.343	0	20.098	15.443
4	p.H77Rfs*63	c.228_229dup	chr1:41249989-41249990	ClinVar and HGMD	32	TAGACCCAGTTCTGCAGGCG	17.635	9.773	no_activity	0	0	0	0	9.259	no_activity
4	p.H77Rfs*63	c.228_229dup	chr1:41249989-41249990	ClinVar and HGMD	33	CGGCGGTAGCGCTTGTGCGC	17.411	5.786	no_activity	1.629	0.385	0	0	7.353	no_activity
4	p.H77Rfs*63	c.228_229dup	chr1:41249989-41249990	ClinVar and HGMD	34	CGCAGGCGGAGCCCGAGCCG	17.163	19.915	9.94	10.598	0	8.984	0	15.953	9.435
4	p.H77Rfs*63	c.228_229dup	chr1:41249989-41249990	ClinVar and HGMD	35	GCCGAGGAGCGCTGGCCGCA	16.85	16.677	0.1	9.452	8.948	6.65	7.38	32.859	37.081
4	p.H77Rfs*63	c.228_229dup	chr1:41249989-41249990	ClinVar and HGMD	36	GTAGACCCAGTTCTGCAGGC	16.573	10.423	3.292	6.141	0.579	0.31	0	40.017	44.887
4	p.H77Rfs*63	c.228_229dup	chr1:41249989-41249990	ClinVar and HGMD	37	CCGGCTCGGGCTCCGCCTGC	16.127	11.989	10.498	2.286	0.004	0.346	0	5.357	2.438
4	p.H77Rfs*63	c.228_229dup	chr1:41249989-41249990	ClinVar and HGMD	38	TAGCGCTTGTGCGCGCGGCC	16.043	14.181	0.072	0	0	0	0	10.367	7.96
4	p.H77Rfs*63	c.228_229dup	chr1:41249989-41249990	ClinVar and HGMD	39	CTCCGGCTCGGGCTCCGCCT	15.611	13.961	no_activity	0	0	0	0	7.924	no_activity
4	p.H77Rfs*63	c.228_229dup	chr1:41249989-41249990	ClinVar and HGMD	40	AGGCGGCGGTAGCGCTTGTG	no_activity	no_activity	15.855	no_activity	no_activity	no_activity	no_activity	44.305	47.729
4	p.H77Rfs*63	c.228_229dup	chr1:41249989-41249990	ClinVar and HGMD	41	CGCACAAGCGCTACCGCCGC	14.744	5.339	no_activity	0	0.182	0	0	no_activity	no_activity
4	p.H77Rfs*63	c.228_229dup	chr1:41249989-41249990	ClinVar and HGMD	42	GCGCTTGTGCGCGCGGCCGA	14.585	19.176	12.213	8.899	3.395	4.079	1.347	36.077	43.479
4	p.H77Rfs*63	c.228_229dup	chr1:41249989-41249990	ClinVar and HGMD	43	GTGCGCGCGGCCGAGGAGCG	13.369	18.319	no_activity	0	0	0	0	18.461	no_activity
4	p.H77Rfs*63	c.228_229dup	chr1:41249989-41249990	ClinVar and HGMD	44	GCCGCGCGCACAAGCGCTAC	12.881	7.239	12.749	4.079	1.425	0.036	0.762	21.023	9.832
4	p.H77Rfs*63	c.228_229dup	chr1:41249989-41249990	ClinVar and HGMD	45	CCTGCAGAACTGGGTCTACA	no_activity	no_activity	no_activity	no_activity	no_activity	no_activity	no_activity	11.069	no_activity
4	p.H77Rfs*63	c.228_229dup	chr1:41249989-41249990	ClinVar and HGMD	46	CCCAGTTCTGCAGGCGGCGG	10.207	11.174	1.762	0	0	0	0	7.969	no_activity
4	p.H77Rfs*63	c.228_229dup	chr1:41249989-41249990	ClinVar and HGMD	47	GCCTGCGGCCAGCGCTCCTC	10.041	9.735	9.035	3.602	1.947	2.008	1.449	21.296	6.059
4	p.H77Rfs*63	c.228_229dup	chr1:41249989-41249990	ClinVar and HGMD	48	GGCGGCGGTAGCGCTTGTGC	9.393	5.127	no_activity	4.429	1.605	0	0	no_activity	no_activity
4	p.H77Rfs*63	c.228_229dup	chr1:41249989-41249990	ClinVar and HGMD	49	GCTGGCCGCAGGCGGAGCCC	9.185	12.262	11.401	17.894	11.877	14.382	2.214	11.81	2.056
4	p.H77Rfs*63	c.228_229dup	chr1:41249989-41249990	ClinVar and HGMD	50	GGAGCGCTGGCCGCAGGCGG	no_activity	no_activity	19.312	no_activity	no_activity	no_activity	no_activity	19.016	19.029
4	p.H77Rfs*63	c.228_229dup	chr1:41249989-41249990	ClinVar and HGMD	51	CCGCAGGCGGAGCCCGAGCC	8.349	11.075	0.7	0	0	0	0	33.753	43.934
4	p.H77Rfs*63	c.228_229dup	chr1:41249989-41249990	ClinVar and HGMD	52	CTCCTCGGCCGCGCGCACAA	8.156	12.913	no_activity	1.042	0	0	0	no_activity	no_activity
4	p.H77Rfs*63	c.228_229dup	chr1:41249989-41249990	ClinVar and HGMD	53	GCGGCGGTAGCGCTTGTGCG	no_activity	no_activity	6.533	no_activity	no_activity	no_activity	no_activity	47.928	43.945
4	p.H77Rfs*63	c.228_229dup	chr1:41249989-41249990	ClinVar and HGMD	54	CAGGCGGCGGTAGCGCTTGT	7.997	10.656	no_activity	1.527	0	0	0	no_activity	no_activity
4	p.H77Rfs*63	c.228_229dup	chr1:41249989-41249990	ClinVar and HGMD	55	GCTCGGGCTCCGCCTGCGGC	7.954	10.484	3.513	6.727	5.289	5.098	0	11.15	no_activity
4	p.H77Rfs*63	c.228_229dup	chr1:41249989-41249990	ClinVar and HGMD	56	GCGGTAGCGCTTGTGCGCGC	7.604	6.549	4.769	5.096	3.605	2.613	0	2.698	0
4	p.H77Rfs*63	c.228_229dup	chr1:41249989-41249990	ClinVar and HGMD	57	CTGGCCGCAGGCGGAGCCCG	no_activity	no_activity	8.665	no_activity	no_activity	no_activity	no_activity	4.156	2.578
4	p.H77Rfs*63	c.228_229dup	chr1:41249989-41249990	ClinVar and HGMD	58	GCGCGCACAAGCGCTACCGC	6.955	5.528	7.513	1.801	0	0	0.365	10.809	4.208
4	p.H77Rfs*63	c.228_229dup	chr1:41249989-41249990	ClinVar and HGMD	59	TCCTCGGCCGCGCGCACAAG	no_activity	no_activity	7.254	no_activity	no_activity	no_activity	no_activity	21.898	9.113
4	p.H77Rfs*63	c.228_229dup	chr1:41249989-41249990	ClinVar and HGMD	60	TGCAGAACTGGGTCTACAAC	6.255	4.964	1.827	0.694	0	0	0	5.054	no_activity
4	p.H77Rfs*63	c.228_229dup	chr1:41249989-41249990	ClinVar and HGMD	61	CTTGTGCGCGCGGCCGAGGA	6.102	15.644	no_activity	0	0	0	0	no_activity	no_activity
4	p.H77Rfs*63	c.228_229dup	chr1:41249989-41249990	ClinVar and HGMD	62	CCAGTTCTGCAGGCGGCGGT	no_activity	no_activity	5.441	no_activity	no_activity	no_activity	no_activity	33.787	34.982
4	p.H77Rfs*63	c.228_229dup	chr1:41249989-41249990	ClinVar and HGMD	63	CGCTGGCCGCAGGCGGAGCC	5.756	5.02	2.598	0	0.34	0	0.034	25.453	37.455
4	p.H77Rfs*63	c.228_229dup	chr1:41249989-41249990	ClinVar and HGMD	64	GCAGGCGGAGCCCGAGCCGG	no_activity	no_activity	9.743	no_activity	no_activity	no_activity	no_activity	16.793	16.172
4	p.H77Rfs*63	c.228_229dup	chr1:41249989-41249990	ClinVar and HGMD	65	GCGCGCGGCCGAGGAGCGCT	5.112	7.153	11.108	0	1.034	0	0.66	16.311	0.787
4	p.H77Rfs*63	c.228_229dup	chr1:41249989-41249990	ClinVar and HGMD	66	GTAGCGCTTGTGCGCGCGGC	5.093	7.015	3.402	3.383	2.26	0	2.536	22.963	43.106
4	p.H77Rfs*63	c.228_229dup	chr1:41249989-41249990	ClinVar and HGMD	67	GACCCAGTTCTGCAGGCGGC	no_activity	no_activity	3.619	no_activity	no_activity	no_activity	no_activity	29.075	no_activity
4	p.H77Rfs*63	c.228_229dup	chr1:41249989-41249990	ClinVar and HGMD	68	CGGCCAGCGCTCCTCGGCCG	no_activity	no_activity	7.938	no_activity	no_activity	no_activity	no_activity	29.594	33.127
4	p.H77Rfs*63	c.228_229dup	chr1:41249989-41249990	ClinVar and HGMD	69	GCACGTTGTAGACCCAGTTC	no_activity	no_activity	7.02	no_activity	no_activity	no_activity	no_activity	26.08	17.016
4	p.H77Rfs*63	c.228_229dup	chr1:41249989-41249990	ClinVar and HGMD	70	GGCCAGCGCTCCTCGGCCGC	4.172	7.528	no_activity	7.342	0.228	0.247	0	no_activity	no_activity
4	p.H77Rfs*63	c.228_229dup	chr1:41249989-41249990	ClinVar and HGMD	71	GCCAGCGCTCCTCGGCCGCG	no_activity	no_activity	7.652	no_activity	no_activity	no_activity	no_activity	27.392	17.076
4	p.H77Rfs*63	c.228_229dup	chr1:41249989-41249990	ClinVar and HGMD	72	GCTCCTCGGCCGCGCGCACA	no_activity	no_activity	1.126	no_activity	no_activity	no_activity	no_activity	37.302	29.685
4	p.H77Rfs*63	c.228_229dup	chr1:41249989-41249990	ClinVar and HGMD	73	CAGTTCTGCAGGCGGCGGTA	3.269	14.666	no_activity	1.028	0	0	0	no_activity	no_activity
4	p.H77Rfs*63	c.228_229dup	chr1:41249989-41249990	ClinVar and HGMD	74	CGGGCTCCGCCTGCGGCCAG	no_activity	no_activity	4.893	no_activity	no_activity	no_activity	no_activity	26.969	16.198
4	p.H77Rfs*63	c.228_229dup	chr1:41249989-41249990	ClinVar and HGMD	75	GCTTGTGCGCGCGGCCGAGG	no_activity	no_activity	5.611	no_activity	no_activity	no_activity	no_activity	28.073	31.651
4	p.H77Rfs*63	c.228_229dup	chr1:41249989-41249990	ClinVar and HGMD	76	TGCGGCCAGCGCTCCTCGGC	no_activity	no_activity	1.895	no_activity	no_activity	no_activity	no_activity	19.394	18.457
4	p.H77Rfs*63	c.228_229dup	chr1:41249989-41249990	ClinVar and HGMD	77	GCACAAGCGCTACCGCCGCC	no_activity	no_activity	2.418	no_activity	no_activity	no_activity	no_activity	25.916	9.699
4	p.H77Rfs*63	c.228_229dup	chr1:41249989-41249990	ClinVar and HGMD	78	CGCGGCCGAGGAGCGCTGGC	no_activity	no_activity	4.985	no_activity	no_activity	no_activity	no_activity	14.74	3.549
4	p.H77Rfs*63	c.228_229dup	chr1:41249989-41249990	ClinVar and HGMD	79	CTGCAGAACTGGGTCTACAA	no_activity	no_activity	18.414	no_activity	no_activity	no_activity	no_activity	48.107	43.341
4	p.H77Rfs*63	c.228_229dup	chr1:41249989-41249990	ClinVar and HGMD	80	CTCGGGCTCCGCCTGCGGCC	no_activity	no_activity	3.156	no_activity	no_activity	no_activity	no_activity	21.033	28.563
4	p.H77Rfs*63	c.228_229dup	chr1:41249989-41249990	ClinVar and HGMD	81	GCGGCCAGCGCTCCTCGGCC	1.486	0	no_activity	0	1.221	0	0	no_activity	no_activity
4	p.H77Rfs*63	c.228_229dup	chr1:41249989-41249990	ClinVar and HGMD	82	CGCCTGCAGAACTGGGTCTA	no_activity	no_activity	14.444	no_activity	no_activity	no_activity	no_activity	4.017	no_activity
4	p.H77Rfs*63	c.228_229dup	chr1:41249989-41249990	ClinVar and HGMD	83	TTGTGCGCGCGGCCGAGGAG	no_activity	no_activity	7.916	no_activity	no_activity	no_activity	no_activity	6.011	9.194
4	p.H77Rfs*63	c.228_229dup	chr1:41249989-41249990	ClinVar and HGMD	84	TCGGGCTCCGCCTGCGGCCA	0.922	1.056	no_activity	0	0	0	0	no_activity	no_activity
4	p.H77Rfs*63	c.228_229dup	chr1:41249989-41249990	ClinVar and HGMD	85	CACGTTGTAGACCCAGTTCT	no_activity	no_activity	no_activity	no_activity	no_activity	no_activity	no_activity	17.064	14.416
4	p.H77Rfs*63	c.228_229dup	chr1:41249989-41249990	ClinVar and HGMD	86	GCCTGCAGAACTGGGTCTAC	no_activity	no_activity	no_activity	no_activity	no_activity	no_activity	no_activity	16.922	3.123
4	p.H77Rfs*63	c.228_229dup	chr1:41249989-41249990	ClinVar and HGMD	87	TGTGCGCGCGGCCGAGGAGC	no_activity	no_activity	no_activity	no_activity	no_activity	no_activity	no_activity	2.309	no_activity
4	p.H77Rfs*63	c.228_229dup	chr1:41249989-41249990	ClinVar and HGMD	88	CAGAACTGGGTCTACAACGT	no_activity	no_activity	no_activity	no_activity	no_activity	no_activity	no_activity	16.696	no_activity
4	p.H77Rfs*63	c.228_229dup	chr1:41249989-41249990	ClinVar and HGMD	89	GGCTCGGGCTCCGCCTGCGG	no_activity	no_activity	no_activity	no_activity	no_activity	no_activity	no_activity	no_activity	9.41
4	p.H77Rfs*63	c.228_229dup	chr1:41249989-41249990	ClinVar and HGMD	90	GCGGCCGAGGAGCGCTGGCC	no_activity	no_activity	no_activity	no_activity	no_activity	no_activity	no_activity	0	1.271
4	p.H77Rfs*63	c.228_229dup	chr1:41249989-41249990	ClinVar and HGMD	91	ACCCAGTTCTGCAGGCGGCG	no_activity	no_activity	no_activity	no_activity	no_activity	no_activity	no_activity	11.582	10.933
4	p.H77Rfs*63	c.228_229dup	chr1:41249989-41249990	ClinVar and HGMD	92	GCGCTCCTCGGCCGCGCGCA	no_activity	no_activity	no_activity	no_activity	no_activity	no_activity	no_activity	28.553	27.708
4	p.H77Rfs*63	c.228_229dup	chr1:41249989-41249990	ClinVar and HGMD	93	CAGCGCTCCTCGGCCGCGCG	no_activity	no_activity	no_activity	no_activity	no_activity	no_activity	no_activity	0	no_activity
4	p.H77Rfs*63	c.228_229dup	chr1:41249989-41249990	ClinVar and HGMD	94	TCCGCCTGCGGCCAGCGCTC	no_activity	no_activity	no_activity	no_activity	no_activity	no_activity	no_activity	1.263	no_activity
5	p.Y88_V90del	c.261_269del	chr1:41250024-41250032	ClinVar and HGMD	1	CTACCGCCGCCTGCAGAACT	60.952	56.783	44.837	34.7	38.574	40.326	0.699	45.108	36.263
5	p.Y88_V90del	c.261_269del	chr1:41250024-41250032	ClinVar and HGMD	2	GCGGCGGTAGCGCTTGTGCG	56.205	56.595	45.435	51.456	46.82	47.541	11.455	45.864	35.806
5	p.Y88_V90del	c.261_269del	chr1:41250024-41250032	ClinVar and HGMD	3	CATGAAGACGTGGTAGACGA	55.064	53.209	40.694	20.114	0.922	43.616	0	46.313	32.401
5	p.Y88_V90del	c.261_269del	chr1:41250024-41250032	ClinVar and HGMD	4	CCAGCACCCAGTTCTGCAGG	53.363	52.864	44.334	45.063	39.28	44.03	4.458	22.107	11.37
5	p.Y88_V90del	c.261_269del	chr1:41250024-41250032	ClinVar and HGMD	5	GCACCCAGTTCTGCAGGCGG	53.232	50.873	37.505	54.372	54.937	47.366	6.751	32.966	27.587
5	p.Y88_V90del	c.261_269del	chr1:41250024-41250032	ClinVar and HGMD	6	CCGCCTGCAGAACTGGGTGC	52.611	46.785	19.135	28.29	6.446	32.401	0	33.281	23.197
5	p.Y88_V90del	c.261_269del	chr1:41250024-41250032	ClinVar and HGMD	7	TAGACGAAGGCCCAGCCGCG	52.584	52.553	44.979	41.2	35.291	42.882	3.549	39.882	30.641
5	p.Y88_V90del	c.261_269del	chr1:41250024-41250032	ClinVar and HGMD	8	TGGGTGCTGGAGCGGCCCCG	50.148	45.257	35.222	40.244	7.007	36.493	0.561	28.616	19.181
5	p.Y88_V90del	c.261_269del	chr1:41250024-41250032	ClinVar and HGMD	9	GCTCCAGCACCCAGTTCTGC	50.02	48.579	29.045	44.799	38.462	38.51	22.714	23.232	9.959
5	p.Y88_V90del	c.261_269del	chr1:41250024-41250032	ClinVar and HGMD	10	GCTACCGCCGCCTGCAGAAC	47.135	44.956	15.85	40.221	33.477	23.15	16.89	32.11	21.992
5	p.Y88_V90del	c.261_269del	chr1:41250024-41250032	ClinVar and HGMD	11	GTAGACGAAGGCCCAGCCGC	45.519	43.781	24.298	47.35	46.69	44.882	36.878	39.477	25.576
5	p.Y88_V90del	c.261_269del	chr1:41250024-41250032	ClinVar and HGMD	12	GGTAGACGAAGGCCCAGCCG	44.298	47.442	21.154	43.722	32.036	42.398	32.694	35.035	27.693
5	p.Y88_V90del	c.261_269del	chr1:41250024-41250032	ClinVar and HGMD	13	TGCAGAACTGGGTGCTGGAG	43.973	34.629	22.936	0	0	0	0	25.658	11.055
5	p.Y88_V90del	c.261_269del	chr1:41250024-41250032	ClinVar and HGMD	14	GTAGCGCTTGTGCGCGGCCG	43.46	38.143	20.987	36.648	30.9	26.441	5.078	39.295	35.202
5	p.Y88_V90del	c.261_269del	chr1:41250024-41250032	ClinVar and HGMD	15	CTGCAGAACTGGGTGCTGGA	38.67	24.058	no_activity	1.811	0	0.842	0	39.775	no_activity
5	p.Y88_V90del	c.261_269del	chr1:41250024-41250032	ClinVar and HGMD	16	GCTGGAGCGGCCCCGCGGCT	38.484	35.505	27.694	37.75	31.66	33.196	14.744	28.02	19.304
5	p.Y88_V90del	c.261_269del	chr1:41250024-41250032	ClinVar and HGMD	17	CGCTCCAGCACCCAGTTCTG	33.183	30.908	16.539	14.074	2.73	16.34	0	33.834	17.481
5	p.Y88_V90del	c.261_269del	chr1:41250024-41250032	ClinVar and HGMD	18	AGCGCTTGTGCGCGGCCGAG	32.322	34.641	25.162	19.631	15.661	19.118	0	34.523	18.767
5	p.Y88_V90del	c.261_269del	chr1:41250024-41250032	ClinVar and HGMD	19	TGCTGGAGCGGCCCCGCGGC	30.668	29.034	9.716	6.311	0	9.462	0.307	24.444	12.888
5	p.Y88_V90del	c.261_269del	chr1:41250024-41250032	ClinVar and HGMD	20	GCCTGCAGAACTGGGTGCTG	30.004	31.037	20.294	24.669	3.597	5.203	0	16.502	12.587
5	p.Y88_V90del	c.261_269del	chr1:41250024-41250032	ClinVar and HGMD	21	CGCCTGCAGAACTGGGTGCT	28.72	26.23	21.73	0.967	0	2.949	0.071	40.863	51.161
5	p.Y88_V90del	c.261_269del	chr1:41250024-41250032	ClinVar and HGMD	22	CTCCAGCACCCAGTTCTGCA	24.807	24.865	14.822	5.738	0	4.506	0.294	55.581	53.648
5	p.Y88_V90del	c.261_269del	chr1:41250024-41250032	ClinVar and HGMD	23	GGCGGCGGTAGCGCTTGTGC	24.798	9.933	no_activity	5.822	1.256	0.374	0	13.286	no_activity
5	p.Y88_V90del	c.261_269del	chr1:41250024-41250032	ClinVar and HGMD	24	GCCGCCTGCAGAACTGGGTG	24.347	22.111	no_activity	9.171	0	0.006	0	15.232	no_activity
5	p.Y88_V90del	c.261_269del	chr1:41250024-41250032	ClinVar and HGMD	25	ACAAGCGCTACCGCCGCCTG	23.828	24.343	8.904	3.11	1.261	3.972	0	24.141	no_activity
5	p.Y88_V90del	c.261_269del	chr1:41250024-41250032	ClinVar and HGMD	26	CGCTACCGCCGCCTGCAGAA	23.259	15.869	no_activity	0	0	0	0	18.91	no_activity
5	p.Y88_V90del	c.261_269del	chr1:41250024-41250032	ClinVar and HGMD	27	ATGAAGACGTGGTAGACGAA	23.1	22.035	35.44	11.75	12.045	5.359	0	43.57	36.214
5	p.Y88_V90del	c.261_269del	chr1:41250024-41250032	ClinVar and HGMD	28	TGGTAGACGAAGGCCCAGCC	21.661	15.488	no_activity	0	0	0	0	0	no_activity
5	p.Y88_V90del	c.261_269del	chr1:41250024-41250032	ClinVar and HGMD	29	TCCAGCACCCAGTTCTGCAG	21.636	15.33	no_activity	0	0	1.028	0	17.48	no_activity
5	p.Y88_V90del	c.261_269del	chr1:41250024-41250032	ClinVar and HGMD	30	GGTAGCGCTTGTGCGCGGCC	21.306	21.509	1.739	8.495	2.683	0	0	18.466	23.281
5	p.Y88_V90del	c.261_269del	chr1:41250024-41250032	ClinVar and HGMD	31	TACCGCCGCCTGCAGAACTG	no_activity	no_activity	26.877	no_activity	no_activity	no_activity	no_activity	42.479	37.304
5	p.Y88_V90del	c.261_269del	chr1:41250024-41250032	ClinVar and HGMD	32	GCCCAGCCGCGGGGCCGCTC	20.529	26.387	21.207	18.625	12.003	0.782	2.114	12.236	no_activity
5	p.Y88_V90del	c.261_269del	chr1:41250024-41250032	ClinVar and HGMD	33	AGCACCCAGTTCTGCAGGCG	20.013	13.772	no_activity	2.027	0.013	0	0	7.688	no_activity
5	p.Y88_V90del	c.261_269del	chr1:41250024-41250032	ClinVar and HGMD	34	AGACGTGGTAGACGAAGGCC	19.551	22.258	13.718	18.873	9.487	8.397	0	14.072	no_activity
5	p.Y88_V90del	c.261_269del	chr1:41250024-41250032	ClinVar and HGMD	35	GTGCTGGAGCGGCCCCGCGG	18.272	21.341	no_activity	16.761	1.709	8.766	1.602	17.114	no_activity
5	p.Y88_V90del	c.261_269del	chr1:41250024-41250032	ClinVar and HGMD	36	CTGGGTGCTGGAGCGGCCCC	18.185	14.963	no_activity	1.021	0	0	0	12.393	no_activity
5	p.Y88_V90del	c.261_269del	chr1:41250024-41250032	ClinVar and HGMD	37	TAGCGCTTGTGCGCGGCCGA	17.955	18.543	2.3	0	0	0	0.188	32.774	44.765
5	p.Y88_V90del	c.261_269del	chr1:41250024-41250032	ClinVar and HGMD	38	CGCGGGGCCGCTCCAGCACC	17.769	21.233	7.27	8.111	1.71	1.286	0	19.728	no_activity
5	p.Y88_V90del	c.261_269del	chr1:41250024-41250032	ClinVar and HGMD	39	CGCACAAGCGCTACCGCCGC	15.828	5.3	no_activity	0	0.254	0	0	no_activity	no_activity
5	p.Y88_V90del	c.261_269del	chr1:41250024-41250032	ClinVar and HGMD	40	GGCCGCTCCAGCACCCAGTT	15.756	20.611	no_activity	0.31	0	0	0	no_activity	no_activity
5	p.Y88_V90del	c.261_269del	chr1:41250024-41250032	ClinVar and HGMD	41	CTGGAGCGGCCCCGCGGCTG	15.034	13.926	17.211	3.484	1.082	3.8	0	18.175	11.174
5	p.Y88_V90del	c.261_269del	chr1:41250024-41250032	ClinVar and HGMD	42	CAAGCGCTACCGCCGCCTGC	14.889	10.054	12.139	2.228	0	1.112	0.205	36.942	36.902
5	p.Y88_V90del	c.261_269del	chr1:41250024-41250032	ClinVar and HGMD	43	ACCGCCGCCTGCAGAACTGG	14.765	17.512	3.048	8.001	12.742	6.999	0.164	8.507	no_activity
5	p.Y88_V90del	c.261_269del	chr1:41250024-41250032	ClinVar and HGMD	44	CCGCCGCCTGCAGAACTGGG	no_activity	no_activity	19.443	no_activity	no_activity	no_activity	no_activity	36.362	37.33
5	p.Y88_V90del	c.261_269del	chr1:41250024-41250032	ClinVar and HGMD	45	AGACGAAGGCCCAGCCGCGG	13.193	16.333	19.213	12.317	10.68	5.358	0	22.037	11.955
5	p.Y88_V90del	c.261_269del	chr1:41250024-41250032	ClinVar and HGMD	46	GCAGGCGGCGGTAGCGCTTG	no_activity	no_activity	no_activity	no_activity	no_activity	no_activity	no_activity	36.464	44.201
5	p.Y88_V90del	c.261_269del	chr1:41250024-41250032	ClinVar and HGMD	47	TGCAGGCGGCGGTAGCGCTT	11.278	12.467	7.395	8.343	0	1.421	0	10.776	no_activity
5	p.Y88_V90del	c.261_269del	chr1:41250024-41250032	ClinVar and HGMD	48	GCAGAACTGGGTGCTGGAGC	10.794	9.816	11.902	9.238	0.899	0.443	0	27.254	16.64
5	p.Y88_V90del	c.261_269del	chr1:41250024-41250032	ClinVar and HGMD	49	CCCAGTTCTGCAGGCGGCGG	10.331	10.904	2.773	0	0	0	0	10.947	no_activity
5	p.Y88_V90del	c.261_269del	chr1:41250024-41250032	ClinVar and HGMD	50	CAGGCGGCGGTAGCGCTTGT	10.202	11.699	no_activity	1.634	0	0	0	no_activity	no_activity
5	p.Y88_V90del	c.261_269del	chr1:41250024-41250032	ClinVar and HGMD	51	AGGCGGCGGTAGCGCTTGTG	no_activity	no_activity	6.038	no_activity	no_activity	no_activity	no_activity	42.081	43.544
5	p.Y88_V90del	c.261_269del	chr1:41250024-41250032	ClinVar and HGMD	52	CAGCACCCAGTTCTGCAGGC	9.313	5.407	3.582	0.695	0	0	0	33.6	36.783
5	p.Y88_V90del	c.261_269del	chr1:41250024-41250032	ClinVar and HGMD	53	CGGCCGCGCACAAGCGCTAC	7.928	5.634	14.677	0.8	0	0	0	18.141	5.751
5	p.Y88_V90del	c.261_269del	chr1:41250024-41250032	ClinVar and HGMD	54	CCAGTTCTGCAGGCGGCGGT	no_activity	no_activity	5.555	no_activity	no_activity	no_activity	no_activity	34.64	35.452
5	p.Y88_V90del	c.261_269del	chr1:41250024-41250032	ClinVar and HGMD	55	CGGCGGTAGCGCTTGTGCGC	6.628	5.634	4.506	1.936	0	0.549	0.176	2.765	0.107
5	p.Y88_V90del	c.261_269del	chr1:41250024-41250032	ClinVar and HGMD	56	GCTCCTCGGCCGCGCACAAG	no_activity	no_activity	6.991	no_activity	no_activity	no_activity	no_activity	33.465	10.707
5	p.Y88_V90del	c.261_269del	chr1:41250024-41250032	ClinVar and HGMD	57	GGGTGCTGGAGCGGCCCCGC	6.529	6.3	5.072	2.756	0.564	2.261	0	15.238	8.703
5	p.Y88_V90del	c.261_269del	chr1:41250024-41250032	ClinVar and HGMD	58	CCGCGCACAAGCGCTACCGC	6.366	4.56	6.96	0.105	0	0	0	8.145	0.433
5	p.Y88_V90del	c.261_269del	chr1:41250024-41250032	ClinVar and HGMD	59	GTGGTAGACGAAGGCCCAGC	no_activity	no_activity	1.258	no_activity	no_activity	no_activity	no_activity	35.197	38.837
5	p.Y88_V90del	c.261_269del	chr1:41250024-41250032	ClinVar and HGMD	60	CCTTCGTCTACCACGTCTTC	no_activity	no_activity	no_activity	no_activity	no_activity	no_activity	no_activity	5.672	no_activity
5	p.Y88_V90del	c.261_269del	chr1:41250024-41250032	ClinVar and HGMD	61	CGGCTGGGCCTTCGTCTACC	no_activity	no_activity	no_activity	no_activity	no_activity	no_activity	no_activity	4.992	no_activity
5	p.Y88_V90del	c.261_269del	chr1:41250024-41250032	ClinVar and HGMD	62	AGTTCTGCAGGCGGCGGTAG	no_activity	no_activity	11.251	no_activity	no_activity	no_activity	no_activity	25.159	14.264
5	p.Y88_V90del	c.261_269del	chr1:41250024-41250032	ClinVar and HGMD	63	GACGTGGTAGACGAAGGCCC	no_activity	no_activity	11.498	no_activity	no_activity	no_activity	no_activity	18.218	10.663
5	p.Y88_V90del	c.261_269del	chr1:41250024-41250032	ClinVar and HGMD	64	CGGTAGCGCTTGTGCGCGGC	3.881	3.519	1.772	0	0	0	0.76	17.837	38.299
5	p.Y88_V90del	c.261_269del	chr1:41250024-41250032	ClinVar and HGMD	65	CACCCAGTTCTGCAGGCGGC	no_activity	no_activity	5.386	no_activity	no_activity	no_activity	no_activity	28.329	no_activity
5	p.Y88_V90del	c.261_269del	chr1:41250024-41250032	ClinVar and HGMD	66	GCCGCTCCAGCACCCAGTTC	no_activity	no_activity	5.995	no_activity	no_activity	no_activity	no_activity	21.129	13.166
5	p.Y88_V90del	c.261_269del	chr1:41250024-41250032	ClinVar and HGMD	67	GGCTGGGCCTTCGTCTACCA	no_activity	no_activity	36.192	no_activity	no_activity	no_activity	no_activity	37.06	no_activity
5	p.Y88_V90del	c.261_269del	chr1:41250024-41250032	ClinVar and HGMD	68	CGCTTGTGCGCGGCCGAGGA	3.397	14.782	no_activity	0	0	0	0	no_activity	no_activity
5	p.Y88_V90del	c.261_269del	chr1:41250024-41250032	ClinVar and HGMD	69	CCTGCAGAACTGGGTGCTGG	no_activity	no_activity	0.62	no_activity	no_activity	no_activity	no_activity	35.014	32.409
5	p.Y88_V90del	c.261_269del	chr1:41250024-41250032	ClinVar and HGMD	70	GCGCTTGTGCGCGGCCGAGG	no_activity	no_activity	5.316	no_activity	no_activity	no_activity	no_activity	29.886	35.979
5	p.Y88_V90del	c.261_269del	chr1:41250024-41250032	ClinVar and HGMD	71	CAGTTCTGCAGGCGGCGGTA	3.278	14.865	no_activity	0.997	0	0	0	no_activity	no_activity
5	p.Y88_V90del	c.261_269del	chr1:41250024-41250032	ClinVar and HGMD	72	AAGCGCTACCGCCGCCTGCA	no_activity	no_activity	17.442	no_activity	no_activity	no_activity	no_activity	17.754	no_activity
5	p.Y88_V90del	c.261_269del	chr1:41250024-41250032	ClinVar and HGMD	73	GCACAAGCGCTACCGCCGCC	no_activity	no_activity	1.979	no_activity	no_activity	no_activity	no_activity	25.127	8.134
5	p.Y88_V90del	c.261_269del	chr1:41250024-41250032	ClinVar and HGMD	74	CACAAGCGCTACCGCCGCCT	no_activity	no_activity	no_activity	no_activity	no_activity	no_activity	no_activity	3.696	10.922
5	p.Y88_V90del	c.261_269del	chr1:41250024-41250032	ClinVar and HGMD	75	GGTGCTGGAGCGGCCCCGCG	no_activity	no_activity	no_activity	no_activity	no_activity	no_activity	no_activity	4.525	no_activity
5	p.Y88_V90del	c.261_269del	chr1:41250024-41250032	ClinVar and HGMD	76	ACTGGGTGCTGGAGCGGCCC	no_activity	no_activity	5.291	no_activity	no_activity	no_activity	no_activity	25.014	28.124
5	p.Y88_V90del	c.261_269del	chr1:41250024-41250032	ClinVar and HGMD	77	CGCCGCCTGCAGAACTGGGT	no_activity	no_activity	no_activity	no_activity	no_activity	no_activity	no_activity	6.607	no_activity
5	p.Y88_V90del	c.261_269del	chr1:41250024-41250032	ClinVar and HGMD	78	CCCAGCCGCGGGGCCGCTCC	no_activity	no_activity	2.398	no_activity	no_activity	no_activity	no_activity	18.093	11.274
5	p.Y88_V90del	c.261_269del	chr1:41250024-41250032	ClinVar and HGMD	79	CCGCGGGGCCGCTCCAGCAC	no_activity	no_activity	no_activity	no_activity	no_activity	no_activity	no_activity	no_activity	9.159
5	p.Y88_V90del	c.261_269del	chr1:41250024-41250032	ClinVar and HGMD	80	CTTCGTCTACCACGTCTTCA	no_activity	no_activity	1.343	no_activity	no_activity	no_activity	no_activity	45.665	35.637
5	p.Y88_V90del	c.261_269del	chr1:41250024-41250032	ClinVar and HGMD	81	CGAAGGCCCAGCCGCGGGGC	no_activity	no_activity	6.255	no_activity	no_activity	no_activity	no_activity	14.178	9.235
5	p.Y88_V90del	c.261_269del	chr1:41250024-41250032	ClinVar and HGMD	82	AAGACGTGGTAGACGAAGGC	no_activity	no_activity	no_activity	no_activity	no_activity	no_activity	no_activity	no_activity	6.557
5	p.Y88_V90del	c.261_269del	chr1:41250024-41250032	ClinVar and HGMD	83	CAGCCGCGGGGCCGCTCCAG	no_activity	no_activity	no_activity	no_activity	no_activity	no_activity	no_activity	5.19	no_activity
5	p.Y88_V90del	c.261_269del	chr1:41250024-41250032	ClinVar and HGMD	84	CTGCAGGCGGCGGTAGCGCT	no_activity	no_activity	6.442	no_activity	no_activity	no_activity	no_activity	42.59	30.117
5	p.Y88_V90del	c.261_269del	chr1:41250024-41250032	ClinVar and HGMD	85	CCGCTCCAGCACCCAGTTCT	no_activity	no_activity	no_activity	no_activity	no_activity	no_activity	no_activity	10.077	19.985
5	p.Y88_V90del	c.261_269del	chr1:41250024-41250032	ClinVar and HGMD	86	CGGCCCCGCGGCTGGGCCTT	no_activity	no_activity	9.813	no_activity	no_activity	no_activity	no_activity	11.069	no_activity
5	p.Y88_V90del	c.261_269del	chr1:41250024-41250032	ClinVar and HGMD	87	GCGGCTGGGCCTTCGTCTAC	no_activity	no_activity	no_activity	no_activity	no_activity	no_activity	no_activity	17.811	0
5	p.Y88_V90del	c.261_269del	chr1:41250024-41250032	ClinVar and HGMD	88	ACCCAGTTCTGCAGGCGGCG	no_activity	no_activity	no_activity	no_activity	no_activity	no_activity	no_activity	10.921	10.34
5	p.Y88_V90del	c.261_269del	chr1:41250024-41250032	ClinVar and HGMD	89	GCGCTACCGCCGCCTGCAGA	no_activity	no_activity	no_activity	no_activity	no_activity	no_activity	no_activity	0.939	no_activity
5	p.Y88_V90del	c.261_269del	chr1:41250024-41250032	ClinVar and HGMD	90	AGCGCTACCGCCGCCTGCAG	no_activity	no_activity	no_activity	no_activity	no_activity	no_activity	no_activity	2.842	no_activity
5	p.Y88_V90del	c.261_269del	chr1:41250024-41250032	ClinVar and HGMD	91	TTCTGCAGGCGGCGGTAGCG	no_activity	no_activity	no_activity	no_activity	no_activity	no_activity	no_activity	1.647	no_activity
5	p.Y88_V90del	c.261_269del	chr1:41250024-41250032	ClinVar and HGMD	92	GGCCCAGCCGCGGGGCCGCT	no_activity	no_activity	no_activity	no_activity	no_activity	no_activity	no_activity	no_activity	3.243
5	p.Y88_V90del	c.261_269del	chr1:41250024-41250032	ClinVar and HGMD	93	GCCTTCGTCTACCACGTCTT	no_activity	no_activity	no_activity	no_activity	no_activity	no_activity	no_activity	35.888	no_activity
5	p.Y88_V90del	c.261_269del	chr1:41250024-41250032	ClinVar and HGMD	94	GCGGGGCCGCTCCAGCACCC	no_activity	no_activity	12.622	no_activity	no_activity	no_activity	no_activity	37.585	28.991
6	p.A154Pfs*85	c.459del	chr1:41283888	ClinVar	1	GCTGCTGCCGCTACCGAGGA	57.12	50.135	36.468	39.619	26.111	11.016	1.769	31.642	29.582
6	p.A154Pfs*85	c.459del	chr1:41283888	ClinVar	2	TCGGTAGCGGCAGCAGCATC	54.209	51.253	39.177	23.917	13.447	32.976	0	27.316	10.264
6	p.A154Pfs*85	c.459del	chr1:41283888	ClinVar	3	CAGCATCCGGCGACCAGACC	53.459	42.57	25.63	2.261	0.31	0	0	29.92	22.179
6	p.A154Pfs*85	c.459del	chr1:41283888	ClinVar	4	GGATGCTGCTGCCGCTACCG	50.005	50.141	33.681	46.766	42.236	42.083	31.406	38.34	35.151
6	p.A154Pfs*85	c.459del	chr1:41283888	ClinVar	5	CATCGTCCGGGTCTGGTCGC	45.983	42.402	23.362	15.782	3.47	12.764	0.676	30.541	14.777
6	p.A154Pfs*85	c.459del	chr1:41283888	ClinVar	6	TGGAGTACATCGTCCGGGTC	45.518	26.498	0	0	0	0	0	26.767	5.961
6	p.A154Pfs*85	c.459del	chr1:41283888	ClinVar	7	GATGATCGTGGTTTTCGGCT	45.157	39.977	16.165	37.944	37.371	22.693	19.894	26.144	30.293
6	p.A154Pfs*85	c.459del	chr1:41283888	ClinVar	8	CGGATGCTGCTGCCGCTACC	41.823	36.269	16.395	7.216	0	11.306	0	43.79	40.838
6	p.A154Pfs*85	c.459del	chr1:41283888	ClinVar	9	GCAGCATCCGGCGACCAGAC	33.845	21.926	6.545	7.394	1.325	0	0	no_activity	no_activity
6	p.A154Pfs*85	c.459del	chr1:41283888	ClinVar	10	CGGCAGCAGCATCCGGCGAC	30.88	20.539	9.128	3.588	0	0	0	26.741	no_activity
6	p.A154Pfs*85	c.459del	chr1:41283888	ClinVar	11	GATGCTGCTGCCGCTACCGA	30.125	27.471	21.714	20.913	14.993	9.127	4.49	29.256	39.133
6	p.A154Pfs*85	c.459del	chr1:41283888	ClinVar	12	GTAGCGGCAGCAGCATCCGG	28.267	26.228	35.622	30.899	20.693	21.529	7.514	33.248	41.278
6	p.A154Pfs*85	c.459del	chr1:41283888	ClinVar	13	AGCATCCGGCGACCAGACCC	23.44	29.191	31.696	25.31	12.265	12.131	2.537	21.458	34.147
6	p.A154Pfs*85	c.459del	chr1:41283888	ClinVar	14	ATCCGGCGACCAGACCCGGA	21.476	23.292	19.273	18.561	13.615	13.573	1.228	38.378	46.029
6	p.A154Pfs*85	c.459del	chr1:41283888	ClinVar	15	TGCTGCTGCCGCTACCGAGG	21.391	15.689	9.443	0.185	0.048	1.051	0	25.427	no_activity
6	p.A154Pfs*85	c.459del	chr1:41283888	ClinVar	16	TGATCGTGGTTTTCGGCTTG	20.157	18.234	9.189	2.133	0.81	1.479	0	20.217	14.699
6	p.A154Pfs*85	c.459del	chr1:41283888	ClinVar	17	CCGGATGCTGCTGCCGCTAC	19.426	13.865	2.07	0	0	0	0.735	30.114	47.295
6	p.A154Pfs*85	c.459del	chr1:41283888	ClinVar	18	CTCGGTAGCGGCAGCAGCAT	18.214	10.525	1.837	0	0	0	0	no_activity	no_activity
6	p.A154Pfs*85	c.459del	chr1:41283888	ClinVar	19	CATCCGGCGACCAGACCCGG	no_activity	no_activity	no_activity	no_activity	no_activity	no_activity	no_activity	no_activity	5.808
6	p.A154Pfs*85	c.459del	chr1:41283888	ClinVar	20	CGGTAGCGGCAGCAGCATCC	16.938	14.057	4.167	10.738	0.253	10.176	0.552	43.64	45.119
6	p.A154Pfs*85	c.459del	chr1:41283888	ClinVar	21	ATGATCGTGGTTTTCGGCTT	14.684	15.407	8.29	12.266	5.904	3.04	2.128	37.053	42.21
6	p.A154Pfs*85	c.459del	chr1:41283888	ClinVar	22	GGTCTGGTCGCCGGATGCTG	13.278	14.404	no_activity	7.789	2.486	0.769	0	no_activity	no_activity
6	p.A154Pfs*85	c.459del	chr1:41283888	ClinVar	23	ACATCGTCCGGGTCTGGTCG	11.586	13.166	4.094	7.288	0.79	0	0	no_activity	no_activity
6	p.A154Pfs*85	c.459del	chr1:41283888	ClinVar	24	GTACATCGTCCGGGTCTGGT	11.023	14.913	30.927	7.917	3.914	0.625	0.044	19.453	11.24
6	p.A154Pfs*85	c.459del	chr1:41283888	ClinVar	25	GTCCGGGTCTGGTCGCCGGA	no_activity	no_activity	5.71	no_activity	no_activity	no_activity	no_activity	39.656	28.028
6	p.A154Pfs*85	c.459del	chr1:41283888	ClinVar	26	ATCGTCCGGGTCTGGTCGCC	8.445	7.651	10.828	4.763	1.471	0	0	23.433	27.05
6	p.A154Pfs*85	c.459del	chr1:41283888	ClinVar	27	CGTCCGGGTCTGGTCGCCGG	8.403	7.627	no_activity	2.766	0.635	3.768	0	2.286	no_activity
6	p.A154Pfs*85	c.459del	chr1:41283888	ClinVar	28	CCGGCGACCAGACCCGGACG	no_activity	no_activity	no_activity	no_activity	no_activity	no_activity	no_activity	10.812	no_activity
6	p.A154Pfs*85	c.459del	chr1:41283888	ClinVar	29	GGAGTACATCGTCCGGGTCT	no_activity	no_activity	32.727	no_activity	no_activity	no_activity	no_activity	33.937	no_activity
6	p.A154Pfs*85	c.459del	chr1:41283888	ClinVar	30	GGCAGCAGCATCCGGCGACC	6.64	9.407	21.881	5.149	0	1.021	0.651	26.256	29.643
6	p.A154Pfs*85	c.459del	chr1:41283888	ClinVar	31	ATGCTGCTGCCGCTACCGAG	no_activity	no_activity	no_activity	no_activity	no_activity	no_activity	no_activity	50.423	23.791
6	p.A154Pfs*85	c.459del	chr1:41283888	ClinVar	32	CAGACCCGGACGATGTACTC	no_activity	no_activity	no_activity	no_activity	no_activity	no_activity	no_activity	30.916	32.243
6	p.A154Pfs*85	c.459del	chr1:41283888	ClinVar	33	GTCTGGTCGCCGGATGCTGC	3.112	2.061	5.489	1.584	0.505	0	0	18.878	3.868
6	p.A154Pfs*85	c.459del	chr1:41283888	ClinVar	34	TGGTCGCCGGATGCTGCTGC	no_activity	no_activity	1.988	no_activity	no_activity	no_activity	no_activity	22.034	11.118
6	p.A154Pfs*85	c.459del	chr1:41283888	ClinVar	35	TGATGATCGTGGTTTTCGGC	1.904	2.105	no_activity	0	0	0	0	2.515	no_activity
6	p.A154Pfs*85	c.459del	chr1:41283888	ClinVar	36	GCAGCAGCATCCGGCGACCA	no_activity	no_activity	11.183	no_activity	no_activity	no_activity	no_activity	19.33	no_activity
6	p.A154Pfs*85	c.459del	chr1:41283888	ClinVar	37	TAGCGGCAGCAGCATCCGGC	no_activity	no_activity	7.567	no_activity	no_activity	no_activity	no_activity	3.235	no_activity
6	p.A154Pfs*85	c.459del	chr1:41283888	ClinVar	38	AAGCCGAAAACCACGATCAT	no_activity	no_activity	no_activity	no_activity	no_activity	no_activity	no_activity	16.678	8.525
6	p.A154Pfs*85	c.459del	chr1:41283888	ClinVar	39	CGGCGACCAGACCCGGACGA	no_activity	no_activity	11.554	no_activity	no_activity	no_activity	no_activity	36.263	18.892
6	p.A154Pfs*85	c.459del	chr1:41283888	ClinVar	40	GAGTACATCGTCCGGGTCTG	no_activity	no_activity	no_activity	no_activity	no_activity	no_activity	no_activity	25.858	no_activity
6	p.A154Pfs*85	c.459del	chr1:41283888	ClinVar	41	GCGACCAGACCCGGACGATG	no_activity	no_activity	no_activity	no_activity	no_activity	no_activity	no_activity	15.153	no_activity
6	p.A154Pfs*85	c.459del	chr1:41283888	ClinVar	42	TCCGGGTCTGGTCGCCGGAT	no_activity	no_activity	no_activity	no_activity	no_activity	no_activity	no_activity	11.73	no_activity
6	p.A154Pfs*85	c.459del	chr1:41283888	ClinVar	43	CGGGTCTGGTCGCCGGATGC	no_activity	no_activity	3.28	no_activity	no_activity	no_activity	no_activity	19.732	8.304
6	p.A154Pfs*85	c.459del	chr1:41283888	ClinVar	44	GCGGCAGCAGCATCCGGCGA	no_activity	no_activity	no_activity	no_activity	no_activity	no_activity	no_activity	no_activity	12.06
6	p.A154Pfs*85	c.459del	chr1:41283888	ClinVar	45	GCATCCGGCGACCAGACCCG	no_activity	no_activity	no_activity	no_activity	no_activity	no_activity	no_activity	23.265	16.51
6	p.A154Pfs*85	c.459del	chr1:41283888	ClinVar	46	ATCCTCGGTAGCGGCAGCAG	no_activity	no_activity	12.158	no_activity	no_activity	no_activity	no_activity	10.367	no_activity
6	p.A154Pfs*85	c.459del	chr1:41283888	ClinVar	47	TCCGGCGACCAGACCCGGAC	no_activity	no_activity	no_activity	no_activity	no_activity	no_activity	no_activity	25.627	0.04
6	p.A154Pfs*85	c.459del	chr1:41283888	ClinVar	48	GATCGTGGTTTTCGGCTTGG	no_activity	no_activity	4.726	no_activity	no_activity	no_activity	no_activity	37.906	no_activity
6	p.A154Pfs*85	c.459del	chr1:41283888	ClinVar	49	GGGTCTGGTCGCCGGATGCT	no_activity	no_activity	no_activity	no_activity	no_activity	no_activity	no_activity	21.098	no_activity
6	p.A154Pfs*85	c.459del	chr1:41283888	ClinVar	50	TCCAAGCCGAAAACCACGAT	no_activity	no_activity	5.628	no_activity	no_activity	no_activity	no_activity	7.487	no_activity
6	p.A154Pfs*85	c.459del	chr1:41283888	ClinVar	51	CCGGGTCTGGTCGCCGGATG	0	5.371	no_activity	0	0	0	0	no_activity	no_activity
6	p.A154Pfs*85	c.459del	chr1:41283888	ClinVar	52	TCGTCCGGGTCTGGTCGCCG	no_activity	no_activity	no_activity	no_activity	no_activity	no_activity	no_activity	32.852	8.404
7	p.G155R	c.463G>A	chr1:41283893	HGMD	1	TGCCGCTACCGAGGATGGCA	57.687	51.677	30.077	16.836	3.719	27.084	0	39.721	17.62
7	p.G155R	c.463G>A	chr1:41283893	HGMD	2	GACCCTGCCATCCTCGGTAG	57.247	53.776	43.431	50.632	28.402	26.397	23.205	31.402	21.841
7	p.G155R	c.463G>A	chr1:41283893	HGMD	3	GTAGCGGCAGCAGCATCTGG	57.099	51.113	38.451	50.324	52.224	51.509	35.299	43.666	31.6
7	p.G155R	c.463G>A	chr1:41283893	HGMD	4	GCTGCTGCCGCTACCGAGGA	56.659	50.209	36.658	39.078	26.225	11.506	1.248	32.389	29.23
7	p.G155R	c.463G>A	chr1:41283893	HGMD	5	GGAAGCGACCCTGCCATCCT	56.087	56.259	40.725	50.421	48.821	45.597	10.029	34.596	33.944
7	p.G155R	c.463G>A	chr1:41283893	HGMD	6	AGCATCTGGCGGACCAGACC	55.24	48.278	32.517	41.441	41.898	45.266	15.943	34.177	21.489
7	p.G155R	c.463G>A	chr1:41283893	HGMD	7	TCGGTAGCGGCAGCAGCATC	53.665	50.761	33.461	21.531	12.637	31.804	0.364	28.527	9.383
7	p.G155R	c.463G>A	chr1:41283893	HGMD	8	CTGCCGCTACCGAGGATGGC	51.481	45.192	20.12	9.136	6.133	10.098	0.278	42.721	31.942
7	p.G155R	c.463G>A	chr1:41283893	HGMD	9	CGGCTTGGAGTACATCGTCC	51.178	48.878	27.793	39.852	0	38.189	0	37.746	20.861
7	p.G155R	c.463G>A	chr1:41283893	HGMD	10	AGATGCTGCTGCCGCTACCG	49.691	50.793	33.393	47.001	44.41	47.028	24.316	38.728	35.865
7	p.G155R	c.463G>A	chr1:41283893	HGMD	11	TCGGCTTGGAGTACATCGTC	48.098	46.397	21.168	2.533	0	11.509	0.114	37.6	23.343
7	p.G155R	c.463G>A	chr1:41283893	HGMD	12	TGGAGTACATCGTCCGGGTC	44.297	23.896	0	0	0	0	0	26.119	2.582
7	p.G155R	c.463G>A	chr1:41283893	HGMD	13	CAGATGCTGCTGCCGCTACC	44.137	36.688	17.873	7.269	0	12.635	0	45.135	46.043
7	p.G155R	c.463G>A	chr1:41283893	HGMD	14	GTACTCCAAGCCGAAAACCA	35.08	32.926	38.486	29.083	11.491	10.919	1.865	41.2	56.12
7	p.G155R	c.463G>A	chr1:41283893	HGMD	15	AGACCCGGACGATGTACTCC	33.195	29.837	11.688	31.764	32.703	34.288	13.076	12.199	no_activity
7	p.G155R	c.463G>A	chr1:41283893	HGMD	16	AGCGACCCTGCCATCCTCGG	33.011	34.458	14.545	19.468	6.194	6.915	1.734	16.021	no_activity
7	p.G155R	c.463G>A	chr1:41283893	HGMD	17	CAGCATCTGGCGGACCAGAC	32.487	14.745	1.685	0	0	0	0	no_activity	no_activity
7	p.G155R	c.463G>A	chr1:41283893	HGMD	18	GGTAGCGGCAGCAGCATCTG	32.183	24.67	no_activity	15.274	6.659	4.552	3.566	24.997	no_activity
7	p.G155R	c.463G>A	chr1:41283893	HGMD	19	GACCCGGACGATGTACTCCA	no_activity	no_activity	36.765	no_activity	no_activity	no_activity	no_activity	35.556	34.372
7	p.G155R	c.463G>A	chr1:41283893	HGMD	20	CCTGCCATCCTCGGTAGCGG	30.44	30.011	21.296	15.226	12.655	20.876	0	9.14	no_activity
7	p.G155R	c.463G>A	chr1:41283893	HGMD	21	CGACCCTGCCATCCTCGGTA	29.924	20.061	no_activity	6.409	0	4.795	0	21.088	no_activity
7	p.G155R	c.463G>A	chr1:41283893	HGMD	22	GCCATCCTCGGTAGCGGCAG	29.385	24.102	24.061	12.885	1.054	0	0	24.952	no_activity
7	p.G155R	c.463G>A	chr1:41283893	HGMD	23	GATGCTGCTGCCGCTACCGA	29.263	27.394	20.699	19.379	12.648	6.388	3.437	30.808	39.929
7	p.G155R	c.463G>A	chr1:41283893	HGMD	24	CGGAAGCGACCCTGCCATCC	27.758	18.473	2.229	1.761	0	2.112	0	no_activity	no_activity
7	p.G155R	c.463G>A	chr1:41283893	HGMD	25	GCTGCCGCTACCGAGGATGG	27.347	30.983	11.541	30.224	24.229	28.705	11.473	22.337	22.634
7	p.G155R	c.463G>A	chr1:41283893	HGMD	26	ATCGTCCGGGTCTGGTCCGC	23.991	21.362	7.465	21.111	18.058	6.848	1.189	17.582	no_activity
7	p.G155R	c.463G>A	chr1:41283893	HGMD	27	TGCTGCTGCCGCTACCGAGG	23.167	16.093	9.305	0.226	0.075	0.95	0	25.574	no_activity
7	p.G155R	c.463G>A	chr1:41283893	HGMD	28	GGCTTGGAGTACATCGTCCG	no_activity	no_activity	36.752	no_activity	no_activity	no_activity	no_activity	38.611	no_activity
7	p.G155R	c.463G>A	chr1:41283893	HGMD	29	GGCAGCAGCATCTGGCGGAC	22.236	19.069	7.598	7.922	0	0	0	22.817	no_activity
7	p.G155R	c.463G>A	chr1:41283893	HGMD	30	CCAGATGCTGCTGCCGCTAC	21.117	15.571	4.949	0	0	0.326	1.034	31.315	46.991
7	p.G155R	c.463G>A	chr1:41283893	HGMD	31	TTCGGCTTGGAGTACATCGT	20.703	11.803	3.372	0	0	0	0	no_activity	no_activity
7	p.G155R	c.463G>A	chr1:41283893	HGMD	32	TCTGGCGGACCAGACCCGGA	20.623	19.577	15.015	9.654	10.333	20.495	0	39.293	43.075
7	p.G155R	c.463G>A	chr1:41283893	HGMD	33	GCATCTGGCGGACCAGACCC	20.537	24.294	30.92	21.352	5.796	5.068	2.865	22.307	29.584
7	p.G155R	c.463G>A	chr1:41283893	HGMD	34	TTGGAGTACATCGTCCGGGT	19.981	9.289	no_activity	0	0	0.33	0	19.647	no_activity
7	p.G155R	c.463G>A	chr1:41283893	HGMD	35	TAGCGGCAGCAGCATCTGGC	19.348	19.663	33.968	12.165	1.209	6.929	0.795	41.521	43.526
7	p.G155R	c.463G>A	chr1:41283893	HGMD	36	CTCGGTAGCGGCAGCAGCAT	19.281	11.347	no_activity	0	0	0	0	11.194	no_activity
7	p.G155R	c.463G>A	chr1:41283893	HGMD	37	GCCGCTACCGAGGATGGCAG	no_activity	no_activity	33.167	no_activity	no_activity	no_activity	no_activity	36.473	no_activity
7	p.G155R	c.463G>A	chr1:41283893	HGMD	38	ATCTGGCGGACCAGACCCGG	no_activity	no_activity	no_activity	no_activity	no_activity	no_activity	no_activity	no_activity	6.062
7	p.G155R	c.463G>A	chr1:41283893	HGMD	39	CGGTAGCGGCAGCAGCATCT	15.107	14.574	2.701	5.138	0.141	7.14	0.719	39.508	41.408
7	p.G155R	c.463G>A	chr1:41283893	HGMD	40	CCGGACGATGTACTCCAAGC	14.205	15.17	4.005	0	0.68	0.978	0	25.699	30.227
7	p.G155R	c.463G>A	chr1:41283893	HGMD	41	GTCTGGTCCGCCAGATGCTG	12.513	8.594	no_activity	1.989	0	0	0	no_activity	no_activity
7	p.G155R	c.463G>A	chr1:41283893	HGMD	42	TCCGGGTCTGGTCCGCCAGA	no_activity	no_activity	15.243	no_activity	no_activity	no_activity	no_activity	46.356	31.235
7	p.G155R	c.463G>A	chr1:41283893	HGMD	43	CTGCTGCCGCTACCGAGGAT	12.194	11.466	7.511	0.733	0.198	0	0	16.178	13.224
7	p.G155R	c.463G>A	chr1:41283893	HGMD	44	GTCCGGGTCTGGTCCGCCAG	12.105	13.882	no_activity	5.188	0	0	0	16.754	no_activity
7	p.G155R	c.463G>A	chr1:41283893	HGMD	45	GCAGCAGCATCTGGCGGACC	12.064	13.125	14.928	4.884	3.688	1.615	0.17	26.224	31.029
7	p.G155R	c.463G>A	chr1:41283893	HGMD	46	TACATCGTCCGGGTCTGGTC	11.98	11.735	19.607	0.576	1.893	1.291	0	10.175	5.382
7	p.G155R	c.463G>A	chr1:41283893	HGMD	47	TGGCAGGGTCGCTTCCGCTT	10.478	11.431	21.331	6.362	1.819	6.071	0	10.439	13.162
7	p.G155R	c.463G>A	chr1:41283893	HGMD	48	TGGCGGACCAGACCCGGACG	no_activity	no_activity	no_activity	no_activity	no_activity	no_activity	no_activity	9.526	no_activity
7	p.G155R	c.463G>A	chr1:41283893	HGMD	49	TGTACTCCAAGCCGAAAACC	no_activity	no_activity	no_activity	no_activity	no_activity	no_activity	no_activity	no_activity	6.381
7	p.G155R	c.463G>A	chr1:41283893	HGMD	50	GAAGCGACCCTGCCATCCTC	no_activity	no_activity	18.163	no_activity	no_activity	no_activity	no_activity	39.115	no_activity
7	p.G155R	c.463G>A	chr1:41283893	HGMD	51	GGAGTACATCGTCCGGGTCT	no_activity	no_activity	33.666	no_activity	no_activity	no_activity	no_activity	35.763	no_activity
7	p.G155R	c.463G>A	chr1:41283893	HGMD	52	CGGGTCTGGTCCGCCAGATG	5.534	12.214	no_activity	0	0	0	0	no_activity	no_activity
7	p.G155R	c.463G>A	chr1:41283893	HGMD	53	CAGACCCGGACGATGTACTC	no_activity	no_activity	no_activity	no_activity	no_activity	no_activity	no_activity	31.626	33.273
7	p.G155R	c.463G>A	chr1:41283893	HGMD	54	GCGACCCTGCCATCCTCGGT	no_activity	no_activity	0.964	no_activity	no_activity	no_activity	no_activity	31.023	35.021
7	p.G155R	c.463G>A	chr1:41283893	HGMD	55	TCGTCCGGGTCTGGTCCGCC	4.243	6.644	0	0	0	0	0	29.825	33.579
7	p.G155R	c.463G>A	chr1:41283893	HGMD	56	ATGCTGCTGCCGCTACCGAG	no_activity	no_activity	no_activity	no_activity	no_activity	no_activity	no_activity	50.852	22.987
7	p.G155R	c.463G>A	chr1:41283893	HGMD	57	GAGGATGGCAGGGTCGCTTC	no_activity	no_activity	7.076	no_activity	no_activity	no_activity	no_activity	30.812	13.469
7	p.G155R	c.463G>A	chr1:41283893	HGMD	58	GGGTCTGGTCCGCCAGATGC	no_activity	no_activity	4.512	no_activity	no_activity	no_activity	no_activity	31.062	18.079
7	p.G155R	c.463G>A	chr1:41283893	HGMD	59	GGCGGACCAGACCCGGACGA	no_activity	no_activity	23.814	no_activity	no_activity	no_activity	no_activity	40.795	26.63
7	p.G155R	c.463G>A	chr1:41283893	HGMD	60	GCTACCGAGGATGGCAGGGT	no_activity	no_activity	6.19	no_activity	no_activity	no_activity	no_activity	16.577	11.746
7	p.G155R	c.463G>A	chr1:41283893	HGMD	61	ACCCTGCCATCCTCGGTAGC	2.962	5.41	4.541	3.667	2.797	2.838	0	27.955	9.564
7	p.G155R	c.463G>A	chr1:41283893	HGMD	62	TCTGGTCCGCCAGATGCTGC	2.834	2.221	7.676	1.505	0	0	0	19.826	0
7	p.G155R	c.463G>A	chr1:41283893	HGMD	63	AGCGGCAGCAGCATCTGGCG	no_activity	no_activity	5.444	no_activity	no_activity	no_activity	no_activity	0.464	no_activity
7	p.G155R	c.463G>A	chr1:41283893	HGMD	64	AAGCGACCCTGCCATCCTCG	no_activity	no_activity	no_activity	no_activity	no_activity	no_activity	no_activity	34.089	30.086
7	p.G155R	c.463G>A	chr1:41283893	HGMD	65	GGTCCGCCAGATGCTGCTGC	no_activity	no_activity	5.478	no_activity	no_activity	no_activity	no_activity	24.73	12.331
7	p.G155R	c.463G>A	chr1:41283893	HGMD	66	CTGCCATCCTCGGTAGCGGC	no_activity	no_activity	0	no_activity	no_activity	no_activity	no_activity	26.174	5.674
7	p.G155R	c.463G>A	chr1:41283893	HGMD	67	TGCTGCCGCTACCGAGGATG	no_activity	no_activity	no_activity	no_activity	no_activity	no_activity	no_activity	6.06	7.366
7	p.G155R	c.463G>A	chr1:41283893	HGMD	68	CCGCTACCGAGGATGGCAGG	no_activity	no_activity	no_activity	no_activity	no_activity	no_activity	no_activity	16.955	no_activity
7	p.G155R	c.463G>A	chr1:41283893	HGMD	69	GTTTTCGGCTTGGAGTACAT	no_activity	no_activity	36.865	no_activity	no_activity	no_activity	no_activity	37.911	no_activity
7	p.G155R	c.463G>A	chr1:41283893	HGMD	70	ATGTACTCCAAGCCGAAAAC	no_activity	no_activity	no_activity	no_activity	no_activity	no_activity	no_activity	35.265	17.65
7	p.G155R	c.463G>A	chr1:41283893	HGMD	71	GGACGATGTACTCCAAGCCG	no_activity	no_activity	no_activity	no_activity	no_activity	no_activity	no_activity	15.634	no_activity
7	p.G155R	c.463G>A	chr1:41283893	HGMD	72	CATCTGGCGGACCAGACCCG	no_activity	no_activity	no_activity	no_activity	no_activity	no_activity	no_activity	21.247	20.752
7	p.G155R	c.463G>A	chr1:41283893	HGMD	73	CGGACCAGACCCGGACGATG	no_activity	no_activity	no_activity	no_activity	no_activity	no_activity	no_activity	16.429	no_activity
7	p.G155R	c.463G>A	chr1:41283893	HGMD	74	CCATCCTCGGTAGCGGCAGC	no_activity	no_activity	3.21	no_activity	no_activity	no_activity	no_activity	22.558	4.504
7	p.G155R	c.463G>A	chr1:41283893	HGMD	75	TGGTTTTCGGCTTGGAGTAC	no_activity	no_activity	no_activity	no_activity	no_activity	no_activity	no_activity	2.564	no_activity
7	p.G155R	c.463G>A	chr1:41283893	HGMD	76	TACTCCAAGCCGAAAACCAC	no_activity	no_activity	14.702	no_activity	no_activity	no_activity	no_activity	11.722	no_activity
7	p.G155R	c.463G>A	chr1:41283893	HGMD	77	GTGGTTTTCGGCTTGGAGTA	no_activity	no_activity	10.595	no_activity	no_activity	no_activity	no_activity	12.107	no_activity
7	p.G155R	c.463G>A	chr1:41283893	HGMD	78	CGTCCGGGTCTGGTCCGCCA	no_activity	no_activity	no_activity	no_activity	no_activity	no_activity	no_activity	34.75	11.917
7	p.G155R	c.463G>A	chr1:41283893	HGMD	79	ATCCTCGGTAGCGGCAGCAG	no_activity	no_activity	9.219	no_activity	no_activity	no_activity	no_activity	7.927	no_activity
7	p.G155R	c.463G>A	chr1:41283893	HGMD	80	CATCGTCCGGGTCTGGTCCG	no_activity	no_activity	no_activity	no_activity	no_activity	no_activity	no_activity	no_activity	12.393
7	p.G155R	c.463G>A	chr1:41283893	HGMD	81	CAGCAGCATCTGGCGGACCA	no_activity	no_activity	15.5	no_activity	no_activity	no_activity	no_activity	14.973	no_activity
7	p.G155R	c.463G>A	chr1:41283893	HGMD	82	GCGGAAGCGACCCTGCCATC	no_activity	no_activity	no_activity	no_activity	no_activity	no_activity	no_activity	9.994	no_activity
7	p.G155R	c.463G>A	chr1:41283893	HGMD	83	CAAAGCGGAAGCGACCCTGC	no_activity	no_activity	4.151	no_activity	no_activity	no_activity	no_activity	12.925	no_activity
7	p.G155R	c.463G>A	chr1:41283893	HGMD	84	CGGACGATGTACTCCAAGCC	no_activity	no_activity	no_activity	no_activity	no_activity	no_activity	no_activity	10.037	no_activity
7	p.G155R	c.463G>A	chr1:41283893	HGMD	85	CCCTGCCATCCTCGGTAGCG	no_activity	no_activity	no_activity	no_activity	no_activity	no_activity	no_activity	11.624	13.085
7	p.G155R	c.463G>A	chr1:41283893	HGMD	86	GGTCTGGTCCGCCAGATGCT	no_activity	no_activity	no_activity	no_activity	no_activity	no_activity	no_activity	24.727	no_activity
7	p.G155R	c.463G>A	chr1:41283893	HGMD	87	CGGCAGCAGCATCTGGCGGA	no_activity	no_activity	no_activity	no_activity	no_activity	no_activity	no_activity	no_activity	5.497
7	p.G155R	c.463G>A	chr1:41283893	HGMD	88	CTGGCGGACCAGACCCGGAC	no_activity	no_activity	no_activity	no_activity	no_activity	no_activity	no_activity	26.898	2.646
7	p.G155R	c.463G>A	chr1:41283893	HGMD	89	TGCCATCCTCGGTAGCGGCA	no_activity	no_activity	no_activity	no_activity	no_activity	no_activity	no_activity	7.716	10.811
7	p.G155R	c.463G>A	chr1:41283893	HGMD	90	CCGGGTCTGGTCCGCCAGAT	no_activity	no_activity	no_activity	no_activity	no_activity	no_activity	no_activity	19.438	no_activity
8	p.F182L	c.546C>G	chr1:41284190	ClinVar and HGMD	1	CCAACACGATGAAGTCTGCA	63.444	59.106	41.391	10.523	0.463	30.978	0	54.252	47.338
8	p.F182L	c.546C>G	chr1:41284190	ClinVar and HGMD	2	GATGTTGCCCTGGGTACCCG	58.742	55.914	35.875	48.076	43.082	44.281	37.047	33.195	28.876
8	p.F182L	c.546C>G	chr1:41284190	ClinVar and HGMD	3	GTCATCGCCGCGGGTACCCA	58.56	56.987	43.147	49.77	43.51	26.857	7.582	30.73	27.417
8	p.F182L	c.546C>G	chr1:41284190	ClinVar and HGMD	4	CAACACGATGAAGTCTGCAG	55.769	52.302	40.451	35.309	12.897	42.183	2.491	33.187	17.825
8	p.F182L	c.546C>G	chr1:41284190	ClinVar and HGMD	5	CTGGGTACCCGCGGCGATGA	54.273	49.834	38.663	6.533	2.654	16.786	0	37.577	32.408
8	p.F182L	c.546C>G	chr1:41284190	ClinVar and HGMD	6	CGTCATCGCCGCGGGTACCC	52.892	46.704	30.674	34.602	8.091	34.691	1.656	38.012	40.388
8	p.F182L	c.546C>G	chr1:41284190	ClinVar and HGMD	7	CGCGGCGATGACGGCCACCG	52.874	47.293	36.621	37.497	0.697	29.88	0	32.439	33.965
8	p.F182L	c.546C>G	chr1:41284190	ClinVar and HGMD	8	CATCGTGTTGGTGGCCTCGG	52.808	46.447	33.696	7.567	0.461	11.229	0	31.688	31.214
8	p.F182L	c.546C>G	chr1:41284190	ClinVar and HGMD	9	GATGAAGTCTGCAGGGGCGG	51.142	47.535	33.136	43.194	38.538	19.132	28.137	27.819	21.777
8	p.F182L	c.546C>G	chr1:41284190	ClinVar and HGMD	10	CTCGGTGGCCGTCATCGCCG	49.564	47.265	27.802	39.863	41.722	42.796	5.361	41.642	28.904
8	p.F182L	c.546C>G	chr1:41284190	ClinVar and HGMD	11	CTTCATCGTGTTGGTGGCCT	46.987	39.356	8.019	0.585	0	2.269	0	14.719	3.829
8	p.F182L	c.546C>G	chr1:41284190	ClinVar and HGMD	12	TGCAGACTTCATCGTGTTGG	46.94	30.741	19.31	0	0	0	0.041	29.126	12.314
8	p.F182L	c.546C>G	chr1:41284190	ClinVar and HGMD	13	ACCAACACGATGAAGTCTGC	46.659	44.77	13.767	41.278	23.095	29.158	0.083	41.635	17.566
8	p.F182L	c.546C>G	chr1:41284190	ClinVar and HGMD	14	CCCTGCAGACTTCATCGTGT	46.476	48.137	24.447	28.633	7.558	37.073	0.229	31.201	14.962
8	p.F182L	c.546C>G	chr1:41284190	ClinVar and HGMD	15	CGATGAAGTCTGCAGGGGCG	46.313	40.518	26.028	4.448	0.476	11.584	0	39.179	29.736
8	p.F182L	c.546C>G	chr1:41284190	ClinVar and HGMD	16	CACGATGAAGTCTGCAGGGG	46.254	37.122	20.076	5.166	0	17.917	0.967	29.368	22.2
8	p.F182L	c.546C>G	chr1:41284190	ClinVar and HGMD	17	TCGGTGGCCGTCATCGCCGC	44.354	43.266	19.064	29.362	9.94	23.195	0.928	26.736	9.934
8	p.F182L	c.546C>G	chr1:41284190	ClinVar and HGMD	18	ACGATGAAGTCTGCAGGGGC	43.486	41.648	11.503	17.244	21.426	16.419	0	34.317	22.679
8	p.F182L	c.546C>G	chr1:41284190	ClinVar and HGMD	19	CACCAACACGATGAAGTCTG	34.128	28.542	4.652	0	0	0	0	24.037	19.653
8	p.F182L	c.546C>G	chr1:41284190	ClinVar and HGMD	20	GAAGTCTGCAGGGGCGGGGG	34.038	34.103	22.931	34.096	22.823	27.417	17.768	18.284	11.238
8	p.F182L	c.546C>G	chr1:41284190	ClinVar and HGMD	21	TCATCGCCGCGGGTACCCAG	33.112	26.461	32.84	8.938	7.942	13.424	0	42.671	40.426
8	p.F182L	c.546C>G	chr1:41284190	ClinVar and HGMD	22	ACACGATGAAGTCTGCAGGG	32.77	30.537	no_activity	27.589	17.866	12.984	0	18.502	no_activity
8	p.F182L	c.546C>G	chr1:41284190	ClinVar and HGMD	23	CCGAGGCCACCAACACGATG	31.798	25.252	10.983	2.573	0	1.474	0	21.26	no_activity
8	p.F182L	c.546C>G	chr1:41284190	ClinVar and HGMD	24	CCGCGGCGATGACGGCCACC	31.061	30.011	9.581	11.871	1.996	2.224	0	34.715	11.657
8	p.F182L	c.546C>G	chr1:41284190	ClinVar and HGMD	25	GCGGCGATGACGGCCACCGA	30.742	24.332	28.728	13.022	7.665	8.701	0.171	26.201	22.672
8	p.F182L	c.546C>G	chr1:41284190	ClinVar and HGMD	26	CTGCAGACTTCATCGTGTTG	29.542	11.589	no_activity	0.172	0	0	0	29.625	no_activity
8	p.F182L	c.546C>G	chr1:41284190	ClinVar and HGMD	27	CGGCCACCGAGGCCACCAAC	no_activity	no_activity	no_activity	no_activity	no_activity	no_activity	no_activity	no_activity	10.718
8	p.F182L	c.546C>G	chr1:41284190	ClinVar and HGMD	28	AGATGTTGCCCTGGGTACCC	28.427	19.921	no_activity	10.926	10.192	4.606	0	19.576	no_activity
8	p.F182L	c.546C>G	chr1:41284190	ClinVar and HGMD	29	TCATCGTGTTGGTGGCCTCG	27.431	22.95	no_activity	2.124	0	3.181	0	27.01	no_activity
8	p.F182L	c.546C>G	chr1:41284190	ClinVar and HGMD	30	CACCGAGGCCACCAACACGA	26.659	24.275	19.43	10.355	2.62	8.402	0.259	38.851	44.819
8	p.F182L	c.546C>G	chr1:41284190	ClinVar and HGMD	31	TGGGTACCCGCGGCGATGAC	26.615	15.72	15.923	1.101	0	0	0	37.122	23.893
8	p.F182L	c.546C>G	chr1:41284190	ClinVar and HGMD	32	ATGTTGCCCTGGGTACCCGC	25.978	15.508	18.616	9.937	10.653	4.264	0.443	44.9	46.807
8	p.F182L	c.546C>G	chr1:41284190	ClinVar and HGMD	33	CCGTCATCGCCGCGGGTACC	24.26	25.205	9.145	0.186	0	0.327	0	22.301	16.221
8	p.F182L	c.546C>G	chr1:41284190	ClinVar and HGMD	34	GGCCACCGAGGCCACCAACA	23.868	27.521	24.009	17.278	0.463	9.277	3.485	36.188	48.919
8	p.F182L	c.546C>G	chr1:41284190	ClinVar and HGMD	35	TCTCGCCGCCCCCGCCCCTG	23.85	23.013	10.106	6.302	10.457	8.654	0	20.67	no_activity
8	p.F182L	c.546C>G	chr1:41284190	ClinVar and HGMD	36	GCAGACTTCATCGTGTTGGT	20.831	15.962	20.518	8.236	4.55	2.591	0.036	36.104	12.701
8	p.F182L	c.546C>G	chr1:41284190	ClinVar and HGMD	37	CCTGGGTACCCGCGGCGATG	19.856	15.367	8.03	3.356	1.054	4.721	0	10.874	no_activity
8	p.F182L	c.546C>G	chr1:41284190	ClinVar and HGMD	38	GGGCGGGGGCGGCGAGATCA	18.251	18.097	18.783	30.02	17.279	8.238	5.376	24.995	no_activity
8	p.F182L	c.546C>G	chr1:41284190	ClinVar and HGMD	39	ATCGTGTTGGTGGCCTCGGT	17.764	11.807	22.821	6.081	2.714	0.829	0	16.598	6.507
8	p.F182L	c.546C>G	chr1:41284190	ClinVar and HGMD	40	AACACGATGAAGTCTGCAGG	17.443	17.199	2.707	10.427	10.271	5.168	0.572	33.177	35.192
8	p.F182L	c.546C>G	chr1:41284190	ClinVar and HGMD	41	CCCCTGCAGACTTCATCGTG	17.313	16.668	no_activity	0.134	0	0	0	7.159	no_activity
8	p.F182L	c.546C>G	chr1:41284190	ClinVar and HGMD	42	GGGGGCGGCGAGATCACAGC	16.531	16.54	15.482	8.751	2.247	5.934	1.193	20.445	no_activity
8	p.F182L	c.546C>G	chr1:41284190	ClinVar and HGMD	43	ATGAAGTCTGCAGGGGCGGG	16.211	19.688	11.727	6.655	10.258	5.014	0	29.716	29.638
8	p.F182L	c.546C>G	chr1:41284190	ClinVar and HGMD	44	TGAAGTCTGCAGGGGCGGGG	15.692	10.72	no_activity	0	0	0	0	6.959	no_activity
8	p.F182L	c.546C>G	chr1:41284190	ClinVar and HGMD	45	CCTCGGTGGCCGTCATCGCC	15.132	6.41	no_activity	0.286	0	0	0	2.514	no_activity
8	p.F182L	c.546C>G	chr1:41284190	ClinVar and HGMD	46	CCACCGAGGCCACCAACACG	no_activity	no_activity	no_activity	no_activity	no_activity	no_activity	no_activity	3.344	3.745
8	p.F182L	c.546C>G	chr1:41284190	ClinVar and HGMD	47	CCCGCGGCGATGACGGCCAC	14.637	14.71	2.923	1.386	0	0.684	0	30.22	41.784
8	p.F182L	c.546C>G	chr1:41284190	ClinVar and HGMD	48	GTTGCCCTGGGTACCCGCGG	13.662	15.834	6.652	10.252	2.98	3.357	2.023	21.532	34.82
8	p.F182L	c.546C>G	chr1:41284190	ClinVar and HGMD	49	GGCGGGGGCGGCGAGATCAC	no_activity	no_activity	22.889	no_activity	no_activity	no_activity	no_activity	13.667	13.903
8	p.F182L	c.546C>G	chr1:41284190	ClinVar and HGMD	50	CGGTGGCCGTCATCGCCGCG	no_activity	no_activity	16.44	no_activity	no_activity	no_activity	no_activity	44.044	no_activity
8	p.F182L	c.546C>G	chr1:41284190	ClinVar and HGMD	51	TGATCTCGCCGCCCCCGCCC	11.647	11.168	no_activity	7.492	0	2.738	0	no_activity	no_activity
8	p.F182L	c.546C>G	chr1:41284190	ClinVar and HGMD	52	GCCCTGGGTACCCGCGGCGA	11.535	16.823	18.095	12.404	7.034	7.623	1.625	19.386	25.649
8	p.F182L	c.546C>G	chr1:41284190	ClinVar and HGMD	53	CTCGCCGCCCCCGCCCCTGC	10.741	9.01	12.784	0.393	1.033	0	0.49	14.714	12.125
8	p.F182L	c.546C>G	chr1:41284190	ClinVar and HGMD	54	GTGGCCTCGGTGGCCGTCAT	10.633	11.862	16.217	1.905	0	0	0	24.993	13.791
8	p.F182L	c.546C>G	chr1:41284190	ClinVar and HGMD	55	CCTGCAGACTTCATCGTGTT	no_activity	no_activity	5.434	no_activity	no_activity	no_activity	no_activity	48.936	29.774
8	p.F182L	c.546C>G	chr1:41284190	ClinVar and HGMD	56	ACTTCATCGTGTTGGTGGCC	10.28	7.198	2.141	0.288	0.255	0	0	no_activity	no_activity
8	p.F182L	c.546C>G	chr1:41284190	ClinVar and HGMD	57	TCTGCAGGGGCGGGGGCGGC	8.703	4.011	0	0	0.07	4.794	0	13.105	15.297
8	p.F182L	c.546C>G	chr1:41284190	ClinVar and HGMD	58	GGCTGTGATCTCGCCGCCCC	8.317	8.344	19.98	2.363	0	0	0.881	29.835	20.228
8	p.F182L	c.546C>G	chr1:41284190	ClinVar and HGMD	59	AAGTCTGCAGGGGCGGGGGC	6.643	6.613	0	2.134	0.754	0.112	0	18.283	12.963
8	p.F182L	c.546C>G	chr1:41284190	ClinVar and HGMD	60	GGCCACCAACACGATGAAGT	6.406	14.039	no_activity	12.973	0	2.702	0	no_activity	no_activity
8	p.F182L	c.546C>G	chr1:41284190	ClinVar and HGMD	61	TGCCCTGGGTACCCGCGGCG	no_activity	no_activity	no_activity	no_activity	no_activity	no_activity	no_activity	2.103	0.945
8	p.F182L	c.546C>G	chr1:41284190	ClinVar and HGMD	62	GCCACCAACACGATGAAGTC	no_activity	no_activity	1.878	no_activity	no_activity	no_activity	no_activity	30.046	16.336
8	p.F182L	c.546C>G	chr1:41284190	ClinVar and HGMD	63	CCGCCCCTGCAGACTTCATC	3.819	2.737	no_activity	0.335	0	0	0	11.063	no_activity
8	p.F182L	c.546C>G	chr1:41284190	ClinVar and HGMD	64	CGAGGCCACCAACACGATGA	no_activity	no_activity	27.495	no_activity	no_activity	no_activity	no_activity	34.41	9.116
8	p.F182L	c.546C>G	chr1:41284190	ClinVar and HGMD	65	GCCTCGGTGGCCGTCATCGC	no_activity	no_activity	0.807	no_activity	no_activity	no_activity	no_activity	27.632	18.589
8	p.F182L	c.546C>G	chr1:41284190	ClinVar and HGMD	66	GTGTTGGTGGCCTCGGTGGC	no_activity	no_activity	24.943	no_activity	no_activity	no_activity	no_activity	26.515	no_activity
8	p.F182L	c.546C>G	chr1:41284190	ClinVar and HGMD	67	ACCGAGGCCACCAACACGAT	no_activity	no_activity	no_activity	no_activity	no_activity	no_activity	no_activity	37.396	37.813
8	p.F182L	c.546C>G	chr1:41284190	ClinVar and HGMD	68	GTCTGCAGGGGCGGGGGCGG	2.552	0	5.006	2.266	0	0.002	1.993	17.94	25.342
8	p.F182L	c.546C>G	chr1:41284190	ClinVar and HGMD	69	CGCCCCTGCAGACTTCATCG	no_activity	no_activity	17.343	no_activity	no_activity	no_activity	no_activity	39.276	11.756
8	p.F182L	c.546C>G	chr1:41284190	ClinVar and HGMD	70	ATGACGGCCACCGAGGCCAC	no_activity	no_activity	13.996	no_activity	no_activity	no_activity	no_activity	12.97	no_activity
8	p.F182L	c.546C>G	chr1:41284190	ClinVar and HGMD	71	GATCTCGCCGCCCCCGCCCC	no_activity	no_activity	6.91	no_activity	no_activity	no_activity	no_activity	16.049	15.812
8	p.F182L	c.546C>G	chr1:41284190	ClinVar and HGMD	72	TCGCCGCCCCCGCCCCTGCA	no_activity	no_activity	no_activity	no_activity	no_activity	no_activity	no_activity	24.035	no_activity
8	p.F182L	c.546C>G	chr1:41284190	ClinVar and HGMD	73	TGCAGGGGCGGGGGCGGCGA	no_activity	no_activity	7.204	no_activity	no_activity	no_activity	no_activity	12.685	no_activity
8	p.F182L	c.546C>G	chr1:41284190	ClinVar and HGMD	74	ACGGCCACCGAGGCCACCAA	no_activity	no_activity	no_activity	no_activity	no_activity	no_activity	no_activity	21.879	18.762
8	p.F182L	c.546C>G	chr1:41284190	ClinVar and HGMD	75	TTCATCGTGTTGGTGGCCTC	no_activity	no_activity	3.209	no_activity	no_activity	no_activity	no_activity	31.946	12.72
8	p.F182L	c.546C>G	chr1:41284190	ClinVar and HGMD	76	ATCTCGCCGCCCCCGCCCCT	no_activity	no_activity	no_activity	no_activity	no_activity	no_activity	no_activity	12.4	12.533
8	p.F182L	c.546C>G	chr1:41284190	ClinVar and HGMD	77	CCACCAACACGATGAAGTCT	no_activity	no_activity	no_activity	no_activity	no_activity	no_activity	no_activity	2.074	9.271
8	p.F182L	c.546C>G	chr1:41284190	ClinVar and HGMD	78	GCGATGACGGCCACCGAGGC	no_activity	no_activity	no_activity	no_activity	no_activity	no_activity	no_activity	0	no_activity
8	p.F182L	c.546C>G	chr1:41284190	ClinVar and HGMD	79	GCCGTCATCGCCGCGGGTAC	no_activity	no_activity	no_activity	no_activity	no_activity	no_activity	no_activity	no_activity	11.459
8	p.F182L	c.546C>G	chr1:41284190	ClinVar and HGMD	80	CTGCAGGGGCGGGGGCGGCG	0.737	0	2.154	1.613	0	0	0	19.313	16.61
8	p.F182L	c.546C>G	chr1:41284190	ClinVar and HGMD	81	CCCGCCCCTGCAGACTTCAT	no_activity	no_activity	11.512	no_activity	no_activity	no_activity	no_activity	38.64	25.592
8	p.F182L	c.546C>G	chr1:41284190	ClinVar and HGMD	82	GCCACCGAGGCCACCAACAC	no_activity	no_activity	no_activity	no_activity	no_activity	no_activity	no_activity	37.895	8.788
8	p.F182L	c.546C>G	chr1:41284190	ClinVar and HGMD	83	GCCGCGGGTACCCAGGGCAA	no_activity	no_activity	8.582	no_activity	no_activity	no_activity	no_activity	13.751	no_activity
8	p.F182L	c.546C>G	chr1:41284190	ClinVar and HGMD	84	TGACGGCCACCGAGGCCACC	no_activity	no_activity	no_activity	no_activity	no_activity	no_activity	no_activity	7.476	no_activity
8	p.F182L	c.546C>G	chr1:41284190	ClinVar and HGMD	85	TCGCCGCGGGTACCCAGGGC	no_activity	no_activity	no_activity	no_activity	no_activity	no_activity	no_activity	0.481	no_activity
8	p.F182L	c.546C>G	chr1:41284190	ClinVar and HGMD	86	CGGGGGCGGCGAGATCACAG	no_activity	no_activity	no_activity	no_activity	no_activity	no_activity	no_activity	no_activity	20.144
8	p.F182L	c.546C>G	chr1:41284190	ClinVar and HGMD	87	GGGGCGGGGGCGGCGAGATC	no_activity	no_activity	no_activity	no_activity	no_activity	no_activity	no_activity	4.608	0.215
8	p.F182L	c.546C>G	chr1:41284190	ClinVar and HGMD	88	ATCGCCGCGGGTACCCAGGG	no_activity	no_activity	9.256	no_activity	no_activity	no_activity	no_activity	1.957	no_activity
8	p.F182L	c.546C>G	chr1:41284190	ClinVar and HGMD	89	GCCCCTGCAGACTTCATCGT	no_activity	no_activity	no_activity	no_activity	no_activity	no_activity	no_activity	17.127	no_activity
8	p.F182L	c.546C>G	chr1:41284190	ClinVar and HGMD	90	TTGGTGGCCTCGGTGGCCGT	no_activity	no_activity	7.133	no_activity	no_activity	no_activity	no_activity	4.347	no_activity
8	p.F182L	c.546C>G	chr1:41284190	ClinVar and HGMD	91	GTACCCGCGGCGATGACGGC	no_activity	no_activity	no_activity	no_activity	no_activity	no_activity	no_activity	0	no_activity
8	p.F182L	c.546C>G	chr1:41284190	ClinVar and HGMD	92	GACTTCATCGTGTTGGTGGC	no_activity	no_activity	no_activity	no_activity	no_activity	no_activity	no_activity	0.777	no_activity
8	p.F182L	c.546C>G	chr1:41284190	ClinVar and HGMD	93	GCCCCCGCCCCTGCAGACTT	no_activity	no_activity	7.596	no_activity	no_activity	no_activity	no_activity	5.112	no_activity
8	p.F182L	c.546C>G	chr1:41284190	ClinVar and HGMD	94	TTGCCCTGGGTACCCGCGGC	no_activity	no_activity	no_activity	no_activity	no_activity	no_activity	no_activity	25.326	3.325
8	p.F182L	c.546C>G	chr1:41284190	ClinVar and HGMD	95	CCCCCGCCCCTGCAGACTTC	no_activity	no_activity	no_activity	no_activity	no_activity	no_activity	no_activity	2.022	no_activity
8	p.F182L	c.546C>G	chr1:41284190	ClinVar and HGMD	96	TGGTGGCCTCGGTGGCCGTC	no_activity	no_activity	no_activity	no_activity	no_activity	no_activity	no_activity	5.771	no_activity
8	p.F182L	c.546C>G	chr1:41284190	ClinVar and HGMD	97	CCCTGGGTACCCGCGGCGAT	no_activity	no_activity	no_activity	no_activity	no_activity	no_activity	no_activity	18.865	4.124
8	p.F182L	c.546C>G	chr1:41284190	ClinVar and HGMD	98	AGGGGCGGGGGCGGCGAGAT	no_activity	no_activity	no_activity	no_activity	no_activity	no_activity	no_activity	4.519	no_activity
9	p.M217K	c.650T>A	chr1:41284294	HGMD	1	ATGGTGCGCAAGGACCGCCG	55.032	56.1	39.841	49.895	50.58	53.429	34.209	28.035	13.051
9	p.M217K	c.650T>A	chr1:41284294	HGMD	2	GATCCTGCGCATGGTGCGCA	52.93	52.213	22.444	43.232	37.143	23.485	12.084	41.973	18.457
9	p.M217K	c.650T>A	chr1:41284294	HGMD	3	GGTCCTTGCGCACCATGCGC	47.673	44.53	19.909	37.691	36.173	34.141	11.025	37.501	12.629
9	p.M217K	c.650T>A	chr1:41284294	HGMD	4	GCACCATGCGCAGGATCTGC	46.65	45.76	22.353	43.249	38.906	41.168	11.792	35.095	11.675
9	p.M217K	c.650T>A	chr1:41284294	HGMD	5	AGGACCGCCGCGGCGGCACC	45.731	44.343	18.431	37.621	31.91	28.328	0	23.579	8.249
9	p.M217K	c.650T>A	chr1:41284294	HGMD	6	GTGCGCAAGGACCGCCGCGG	45.705	44.021	38.83	42.328	28.996	34.636	20.271	31.632	21.105
9	p.M217K	c.650T>A	chr1:41284294	HGMD	7	TGCGCAGCATGCGCTTCCTG	32.131	22.761	8.079	1.864	0.371	3.602	0	27.366	no_activity
9	p.M217K	c.650T>A	chr1:41284294	HGMD	8	TGCAGGAAGCGCATGCTGCG	31.147	29.828	13.355	0	0	0	0	20.674	no_activity
9	p.M217K	c.650T>A	chr1:41284294	HGMD	9	GGTGCGCAAGGACCGCCGCG	30.748	25.623	no_activity	19.405	13.446	17.211	2.094	31.488	no_activity
9	p.M217K	c.650T>A	chr1:41284294	HGMD	10	CGGTCCTTGCGCACCATGCG	30.722	27.895	2.075	0	0	3.377	0	29.744	24.399
9	p.M217K	c.650T>A	chr1:41284294	HGMD	11	CGCACCATGCGCAGGATCTG	29.867	25.636	5.252	0.296	0	4.724	0.257	28.732	13.107
9	p.M217K	c.650T>A	chr1:41284294	HGMD	12	ACCGCCGCGGCGGCACCTGG	27.813	32.229	21.624	23.893	11.514	15.625	2.72	13.808	no_activity
9	p.M217K	c.650T>A	chr1:41284294	HGMD	13	ATCCTGCGCATGGTGCGCAA	27.281	31.855	42.891	23.074	10.834	9.177	0.059	40.912	40.679
9	p.M217K	c.650T>A	chr1:41284294	HGMD	14	CATGGTGCGCAAGGACCGCC	27.269	15.768	no_activity	4.757	1.584	4.863	0	9.872	no_activity
9	p.M217K	c.650T>A	chr1:41284294	HGMD	15	GTCCTTGCGCACCATGCGCA	25.05	26.839	16.406	14.518	12.359	5.375	1.372	38.852	36.764
9	p.M217K	c.650T>A	chr1:41284294	HGMD	16	GGCGGTCCTTGCGCACCATG	no_activity	no_activity	16.412	no_activity	no_activity	no_activity	no_activity	41.675	29.357
9	p.M217K	c.650T>A	chr1:41284294	HGMD	17	GCTTCCTGCAGATCCTGCGC	21.665	14.672	3.617	6.175	1.735	0.169	0	19.115	no_activity
9	p.M217K	c.650T>A	chr1:41284294	HGMD	18	AGATCCTGCGCATGGTGCGC	20.8	24.098	3.587	18.742	19.265	13.741	0	27.217	12.648
9	p.M217K	c.650T>A	chr1:41284294	HGMD	19	GCGGCGGTCCTTGCGCACCA	no_activity	no_activity	no_activity	no_activity	no_activity	no_activity	no_activity	47.1	57.749
9	p.M217K	c.650T>A	chr1:41284294	HGMD	20	GGACCGCCGCGGCGGCACCT	19.471	22.99	19.341	18.756	11.429	11.289	6.196	37.528	44.45
9	p.M217K	c.650T>A	chr1:41284294	HGMD	21	AAGGACCGCCGCGGCGGCAC	19.065	14.501	no_activity	0.582	1.485	0	0	13.764	no_activity
9	p.M217K	c.650T>A	chr1:41284294	HGMD	22	GCGCAGCATGCGCTTCCTGC	16.406	14.893	10.514	7.321	1.438	1.208	0.218	42.46	33.76
9	p.M217K	c.650T>A	chr1:41284294	HGMD	23	ATCTGCAGGAAGCGCATGCT	13.858	21.079	no_activity	8.61	1.69	1.797	0	no_activity	no_activity
9	p.M217K	c.650T>A	chr1:41284294	HGMD	24	GGATCTGCAGGAAGCGCATG	13.189	20.43	no_activity	8.79	0	1.602	0	no_activity	no_activity
9	p.M217K	c.650T>A	chr1:41284294	HGMD	25	CGCTGCGCAGCATGCGCTTC	12.853	6.067	no_activity	0	0	0	0	no_activity	no_activity
9	p.M217K	c.650T>A	chr1:41284294	HGMD	26	CTGCAGATCCTGCGCATGGT	12.745	14.577	no_activity	1.698	0	0	0	no_activity	no_activity
9	p.M217K	c.650T>A	chr1:41284294	HGMD	27	ATGCGCAGGATCTGCAGGAA	11.812	19.866	no_activity	3.36	0	0	0	no_activity	no_activity
9	p.M217K	c.650T>A	chr1:41284294	HGMD	28	TGCGCAGGATCTGCAGGAAG	no_activity	no_activity	11.271	no_activity	no_activity	no_activity	no_activity	30.378	14.042
9	p.M217K	c.650T>A	chr1:41284294	HGMD	29	ATGCGCTTCCTGCAGATCCT	11.063	17.324	no_activity	11.943	3.734	0.623	0	no_activity	no_activity
9	p.M217K	c.650T>A	chr1:41284294	HGMD	30	GATCTGCAGGAAGCGCATGC	no_activity	no_activity	no_activity	no_activity	no_activity	no_activity	no_activity	43.917	48.753
9	p.M217K	c.650T>A	chr1:41284294	HGMD	31	AGGAAGCGCATGCTGCGCAG	no_activity	no_activity	6.878	no_activity	no_activity	no_activity	no_activity	37.777	42.331
9	p.M217K	c.650T>A	chr1:41284294	HGMD	32	TGCGCTTCCTGCAGATCCTG	no_activity	no_activity	15.298	no_activity	no_activity	no_activity	no_activity	29.789	12.678
9	p.M217K	c.650T>A	chr1:41284294	HGMD	33	CGGCGGTCCTTGCGCACCAT	8.539	9.378	no_activity	1.112	0	0	0	no_activity	no_activity
9	p.M217K	c.650T>A	chr1:41284294	HGMD	34	CCGCCGCGGCGGCACCTGGA	no_activity	no_activity	16.847	no_activity	no_activity	no_activity	no_activity	42.555	34.816
9	p.M217K	c.650T>A	chr1:41284294	HGMD	35	TCTGCAGGAAGCGCATGCTG	no_activity	no_activity	8.502	no_activity	no_activity	no_activity	no_activity	36.262	20.842
9	p.M217K	c.650T>A	chr1:41284294	HGMD	36	TGCAGATCCTGCGCATGGTG	no_activity	no_activity	2.876	no_activity	no_activity	no_activity	no_activity	11.19	4.674
9	p.M217K	c.650T>A	chr1:41284294	HGMD	37	TGCCGCCGCGGCGGTCCTTG	no_activity	no_activity	8.035	no_activity	no_activity	no_activity	no_activity	31.543	17.827
9	p.M217K	c.650T>A	chr1:41284294	HGMD	38	TGCGCAAGGACCGCCGCGGC	7.673	5.464	6.045	0.401	0	1.264	0	21.863	9.313
9	p.M217K	c.650T>A	chr1:41284294	HGMD	39	TGCGCATGGTGCGCAAGGAC	7.161	5.114	11.438	1.042	0	0	0	16.002	7.714
9	p.M217K	c.650T>A	chr1:41284294	HGMD	40	CATGCGCTTCCTGCAGATCC	no_activity	no_activity	no_activity	no_activity	no_activity	no_activity	no_activity	39.896	49.654
9	p.M217K	c.650T>A	chr1:41284294	HGMD	41	CGCGGCGGTCCTTGCGCACC	6.764	4.344	no_activity	0	1.897	0	0	4.275	no_activity
9	p.M217K	c.650T>A	chr1:41284294	HGMD	42	CAGGATCTGCAGGAAGCGCA	no_activity	no_activity	2.989	no_activity	no_activity	no_activity	no_activity	42.667	24.006
9	p.M217K	c.650T>A	chr1:41284294	HGMD	43	TTGCGCACCATGCGCAGGAT	6.018	4.578	no_activity	0	0	0	0	no_activity	no_activity
9	p.M217K	c.650T>A	chr1:41284294	HGMD	44	GCATGCGCTTCCTGCAGATC	5.835	7.286	no_activity	2.594	0	0	0	no_activity	no_activity
9	p.M217K	c.650T>A	chr1:41284294	HGMD	45	GCAGGATCTGCAGGAAGCGC	5.82	8.075	no_activity	4.879	1.438	1.693	0	5.61	no_activity
9	p.M217K	c.650T>A	chr1:41284294	HGMD	46	TGGTGCGCAAGGACCGCCGC	5.735	2.749	0.719	0.461	0	0.57	0	23.908	19.398
9	p.M217K	c.650T>A	chr1:41284294	HGMD	47	TGCGCACCATGCGCAGGATC	no_activity	no_activity	0.926	no_activity	no_activity	no_activity	no_activity	20.266	10.776
9	p.M217K	c.650T>A	chr1:41284294	HGMD	48	CAGGAAGCGCATGCTGCGCA	2.895	12.445	no_activity	0	0	0	0	no_activity	no_activity
9	p.M217K	c.650T>A	chr1:41284294	HGMD	49	CTTCCAGGTGCCGCCGCGGC	no_activity	no_activity	15.924	no_activity	no_activity	no_activity	no_activity	20.629	no_activity
9	p.M217K	c.650T>A	chr1:41284294	HGMD	50	GACCGCCGCGGCGGCACCTG	no_activity	no_activity	no_activity	no_activity	no_activity	no_activity	no_activity	27.998	34.309
9	p.M217K	c.650T>A	chr1:41284294	HGMD	51	GCTGCGCAGCATGCGCTTCC	no_activity	no_activity	1.941	no_activity	no_activity	no_activity	no_activity	33.344	19.797
9	p.M217K	c.650T>A	chr1:41284294	HGMD	52	GCAGGAAGCGCATGCTGCGC	no_activity	no_activity	2.333	no_activity	no_activity	no_activity	no_activity	36.827	30.972
9	p.M217K	c.650T>A	chr1:41284294	HGMD	53	GCATGGTGCGCAAGGACCGC	no_activity	no_activity	1.812	no_activity	no_activity	no_activity	no_activity	30.474	24.592
9	p.M217K	c.650T>A	chr1:41284294	HGMD	54	CTGCGCAGCATGCGCTTCCT	no_activity	no_activity	no_activity	no_activity	no_activity	no_activity	no_activity	9.287	17.447
9	p.M217K	c.650T>A	chr1:41284294	HGMD	55	TCCTTGCGCACCATGCGCAG	no_activity	no_activity	12.482	no_activity	no_activity	no_activity	no_activity	15.277	no_activity
9	p.M217K	c.650T>A	chr1:41284294	HGMD	56	GCGCACCATGCGCAGGATCT	no_activity	no_activity	no_activity	no_activity	no_activity	no_activity	no_activity	1.997	11.518
9	p.M217K	c.650T>A	chr1:41284294	HGMD	57	GGTGCCGCCGCGGCGGTCCT	no_activity	no_activity	no_activity	no_activity	no_activity	no_activity	no_activity	28.416	38.287
9	p.M217K	c.650T>A	chr1:41284294	HGMD	58	CGCAAGGACCGCCGCGGCGG	no_activity	no_activity	no_activity	no_activity	no_activity	no_activity	no_activity	4.3	no_activity
9	p.M217K	c.650T>A	chr1:41284294	HGMD	59	CCGCCGCGGCGGTCCTTGCG	no_activity	no_activity	no_activity	no_activity	no_activity	no_activity	no_activity	0	no_activity
9	p.M217K	c.650T>A	chr1:41284294	HGMD	60	GTGCCGCCGCGGCGGTCCTT	0.389	11.564	no_activity	12.89	4.031	2.668	0	no_activity	no_activity
9	p.M217K	c.650T>A	chr1:41284294	HGMD	61	CAGATCCTGCGCATGGTGCG	no_activity	no_activity	no_activity	no_activity	no_activity	no_activity	no_activity	19.713	32.518
9	p.M217K	c.650T>A	chr1:41284294	HGMD	62	AGGATCTGCAGGAAGCGCAT	no_activity	no_activity	no_activity	no_activity	no_activity	no_activity	no_activity	22.46	no_activity
9	p.M217K	c.650T>A	chr1:41284294	HGMD	63	CCGCGGCGGTCCTTGCGCAC	no_activity	no_activity	no_activity	no_activity	no_activity	no_activity	no_activity	32.038	no_activity
9	p.M217K	c.650T>A	chr1:41284294	HGMD	64	CAGGTGCCGCCGCGGCGGTC	no_activity	no_activity	no_activity	no_activity	no_activity	no_activity	no_activity	1.993	no_activity
9	p.M217K	c.650T>A	chr1:41284294	HGMD	65	CTGCAGGAAGCGCATGCTGC	no_activity	no_activity	no_activity	no_activity	no_activity	no_activity	no_activity	4.92	6.569
9	p.M217K	c.650T>A	chr1:41284294	HGMD	66	CGCAGCATGCGCTTCCTGCA	no_activity	no_activity	15.953	no_activity	no_activity	no_activity	no_activity	27.758	no_activity
9	p.M217K	c.650T>A	chr1:41284294	HGMD	67	TCCTGCGCATGGTGCGCAAG	no_activity	no_activity	5.15	no_activity	no_activity	no_activity	no_activity	7.241	no_activity
9	p.M217K	c.650T>A	chr1:41284294	HGMD	68	GCGGTCCTTGCGCACCATGC	no_activity	no_activity	no_activity	no_activity	no_activity	no_activity	no_activity	2.755	8.284
9	p.M217K	c.650T>A	chr1:41284294	HGMD	69	CGCTTCCTGCAGATCCTGCG	no_activity	no_activity	no_activity	no_activity	no_activity	no_activity	no_activity	22.14	no_activity
9	p.M217K	c.650T>A	chr1:41284294	HGMD	70	CGCAGGATCTGCAGGAAGCG	no_activity	no_activity	no_activity	no_activity	no_activity	no_activity	no_activity	23.874	no_activity
10	p.T223_G228del	c.667_684del18	chr1:41284311-41284328	HGMD	1	AGTGGTCTACGCGCATAGCA	58.02	54.365	39.48	54.228	44.374	53.351	5.073	42.107	32.677
10	p.T223_G228del	c.667_684del18	chr1:41284311-41284328	HGMD	2	CTTCCTGCAGATCCTGCGCA	55.184	50.365	26.279	14.059	0	23.868	0	46.688	24.796
10	p.T223_G228del	c.667_684del18	chr1:41284311-41284328	HGMD	3	ATGGTGCGCATGGACCGCCG	54.737	55.907	36.806	49.246	45.076	51.166	27.152	28.099	15.526
10	p.T223_G228del	c.667_684del18	chr1:41284311-41284328	HGMD	4	CGTAGACCACTGAGCCGCCG	54.541	40.373	33.632	4.965	0	16.137	0	22.828	13.208
10	p.T223_G228del	c.667_684del18	chr1:41284311-41284328	HGMD	5	GATCCTGCGCATGGTGCGCA	53.961	52.348	24.637	43.006	32.504	21.767	10.996	43.037	21.622
10	p.T223_G228del	c.667_684del18	chr1:41284311-41284328	HGMD	6	TCTACGCGCATAGCAAGGTG	53.531	52.289	41.478	25.721	22.135	43.36	0.035	40.794	35.137
10	p.T223_G228del	c.667_684del18	chr1:41284311-41284328	HGMD	7	GGACCGCCGCGGCGGCTCAG	51.488	53.365	43.278	44.834	40.578	43.581	22.623	44.439	39.841
10	p.T223_G228del	c.667_684del18	chr1:41284311-41284328	HGMD	8	GGTCCATGCGCACCATGCGC	47.741	46.236	21.685	40.561	37.139	37.153	19.773	38.547	14.623
10	p.T223_G228del	c.667_684del18	chr1:41284311-41284328	HGMD	9	GCACCATGCGCAGGATCTGC	46.903	46.417	22.612	44.415	39.43	41.498	12.256	35.488	11.358
10	p.T223_G228del	c.667_684del18	chr1:41284311-41284328	HGMD	10	AGACCACTGAGCCGCCGCGG	42.938	48.203	26.007	42.65	40.321	41.727	22.952	31.313	24.504
10	p.T223_G228del	c.667_684del18	chr1:41284311-41284328	HGMD	11	GTGCGCATGGACCGCCGCGG	41.81	40.006	30.051	42.481	35.568	32.895	21.282	28.767	19.148
10	p.T223_G228del	c.667_684del18	chr1:41284311-41284328	HGMD	12	GTCTACGCGCATAGCAAGGT	40.713	33.56	23.585	27.27	20.001	4.369	1.305	40.003	26.014
10	p.T223_G228del	c.667_684del18	chr1:41284311-41284328	HGMD	13	CACCATGCGCAGGATCTGCA	39.911	37.538	29.663	17.906	1.63	9.507	0.452	51.28	53.252
10	p.T223_G228del	c.667_684del18	chr1:41284311-41284328	HGMD	14	TGCTATGCGCGTAGACCACT	37.518	30.608	34.128	11.061	2.875	4.934	0	33.406	14.328
10	p.T223_G228del	c.667_684del18	chr1:41284311-41284328	HGMD	15	CAGTGGTCTACGCGCATAGC	34.758	31.447	6.559	1.308	0	4.457	0.234	33.893	11.447
10	p.T223_G228del	c.667_684del18	chr1:41284311-41284328	HGMD	16	GGTGCGCATGGACCGCCGCG	31.374	26.835	no_activity	20.51	18.082	17.233	0.806	29.854	no_activity
10	p.T223_G228del	c.667_684del18	chr1:41284311-41284328	HGMD	17	GGTCTACGCGCATAGCAAGG	31.293	29.895	16.174	26.395	25.333	22.605	6.918	46.695	56.514
10	p.T223_G228del	c.667_684del18	chr1:41284311-41284328	HGMD	18	CGCACCATGCGCAGGATCTG	30.526	25.693	5.827	0.68	0	4.642	0.251	27.857	12.465
10	p.T223_G228del	c.667_684del18	chr1:41284311-41284328	HGMD	19	CGGTCCATGCGCACCATGCG	30.359	28.015	3.327	0.356	0	6.041	0	32.141	25.505
10	p.T223_G228del	c.667_684del18	chr1:41284311-41284328	HGMD	20	TAGACCACTGAGCCGCCGCG	30.05	19.514	no_activity	0.773	0	2.127	0	16.213	no_activity
10	p.T223_G228del	c.667_684del18	chr1:41284311-41284328	HGMD	21	GTCCATGCGCACCATGCGCA	28.183	28.66	19.251	20.6	14.882	6.822	2.459	43.315	38.233
10	p.T223_G228del	c.667_684del18	chr1:41284311-41284328	HGMD	22	GCTATGCGCGTAGACCACTG	no_activity	no_activity	35.976	no_activity	no_activity	no_activity	no_activity	37.704	32.515
10	p.T223_G228del	c.667_684del18	chr1:41284311-41284328	HGMD	23	CATGGTGCGCATGGACCGCC	26.844	14.548	no_activity	3.122	0.69	2.823	0	11.449	no_activity
10	p.T223_G228del	c.667_684del18	chr1:41284311-41284328	HGMD	24	GGCTCAGTGGTCTACGCGCA	26.66	30.472	10.221	14.024	0	1.646	0	12.346	no_activity
10	p.T223_G228del	c.667_684del18	chr1:41284311-41284328	HGMD	25	GCGTAGACCACTGAGCCGCC	25.721	16.878	no_activity	6.026	6.071	3.399	0	11.626	no_activity
10	p.T223_G228del	c.667_684del18	chr1:41284311-41284328	HGMD	26	ATCCTGCGCATGGTGCGCAT	24.305	24.405	40.932	21.367	6.78	8.263	1.332	36.3	31.887
10	p.T223_G228del	c.667_684del18	chr1:41284311-41284328	HGMD	27	CATGCGCAGGATCTGCAGGA	no_activity	no_activity	22.241	no_activity	no_activity	no_activity	no_activity	50.745	57.602
10	p.T223_G228del	c.667_684del18	chr1:41284311-41284328	HGMD	28	GGCGGTCCATGCGCACCATG	no_activity	no_activity	18.034	no_activity	no_activity	no_activity	no_activity	41.291	29.445
10	p.T223_G228del	c.667_684del18	chr1:41284311-41284328	HGMD	29	CCATGCGCAGGATCTGCAGG	22.128	27.771	17.517	9.894	0	8.274	0	16.766	no_activity
10	p.T223_G228del	c.667_684del18	chr1:41284311-41284328	HGMD	30	GCGGCGGTCCATGCGCACCA	no_activity	no_activity	no_activity	no_activity	no_activity	no_activity	no_activity	47.967	60.329
10	p.T223_G228del	c.667_684del18	chr1:41284311-41284328	HGMD	31	TTGCTATGCGCGTAGACCAC	20.638	16.721	15.26	3.829	0.883	1.456	0.276	36.496	45.953
10	p.T223_G228del	c.667_684del18	chr1:41284311-41284328	HGMD	32	CTACGCGCATAGCAAGGTGA	20.52	14.114	27.525	0.709	0	0.101	0	20.078	8.829
10	p.T223_G228del	c.667_684del18	chr1:41284311-41284328	HGMD	33	TGGACCGCCGCGGCGGCTCA	19.541	16.015	no_activity	0	0	0	0	20.143	no_activity
10	p.T223_G228del	c.667_684del18	chr1:41284311-41284328	HGMD	34	CCTGCAGATCCTGCGCATGG	no_activity	no_activity	no_activity	no_activity	no_activity	no_activity	no_activity	46.3	51.656
10	p.T223_G228del	c.667_684del18	chr1:41284311-41284328	HGMD	35	GTAGACCACTGAGCCGCCGC	16.04	4.326	0.605	4.378	0.051	0.565	0.522	30.573	37.662
10	p.T223_G228del	c.667_684del18	chr1:41284311-41284328	HGMD	36	TGGTCTACGCGCATAGCAAG	15.607	16.13	no_activity	1.046	0	0	0	6.924	no_activity
10	p.T223_G228del	c.667_684del18	chr1:41284311-41284328	HGMD	37	AGATCCTGCGCATGGTGCGC	14.649	13.27	2.089	7.285	3.814	1.546	0	19.871	no_activity
10	p.T223_G228del	c.667_684del18	chr1:41284311-41284328	HGMD	38	CATGGACCGCCGCGGCGGCT	13.604	12.265	4.901	1.378	0.072	0	0	0	no_activity
10	p.T223_G228del	c.667_684del18	chr1:41284311-41284328	HGMD	39	ATGCGCACCATGCGCAGGAT	13.468	13.283	no_activity	0.204	0	0	0	no_activity	no_activity
10	p.T223_G228del	c.667_684del18	chr1:41284311-41284328	HGMD	40	CCTCACCTTGCTATGCGCGT	13.323	10.495	8.906	0.493	0	0.754	0	21.78	26.347
10	p.T223_G228del	c.667_684del18	chr1:41284311-41284328	HGMD	41	CTGCAGATCCTGCGCATGGT	13.146	15.866	no_activity	1.528	0	0	0	no_activity	no_activity
10	p.T223_G228del	c.667_684del18	chr1:41284311-41284328	HGMD	42	CGCGGCGGCTCAGTGGTCTA	no_activity	no_activity	17.634	no_activity	no_activity	no_activity	no_activity	39.576	51.749
10	p.T223_G228del	c.667_684del18	chr1:41284311-41284328	HGMD	43	TCCTGCAGATCCTGCGCATG	12.964	14.088	2.757	0.539	0	0.478	0	11.556	no_activity
10	p.T223_G228del	c.667_684del18	chr1:41284311-41284328	HGMD	44	GCTCAGTGGTCTACGCGCAT	no_activity	no_activity	8.166	no_activity	no_activity	no_activity	no_activity	23.431	17.735
10	p.T223_G228del	c.667_684del18	chr1:41284311-41284328	HGMD	45	GTGGTCTACGCGCATAGCAA	no_activity	no_activity	11.825	no_activity	no_activity	no_activity	no_activity	45.292	37.644
10	p.T223_G228del	c.667_684del18	chr1:41284311-41284328	HGMD	46	CTTGCTATGCGCGTAGACCA	no_activity	no_activity	no_activity	no_activity	no_activity	no_activity	no_activity	15.29	no_activity
10	p.T223_G228del	c.667_684del18	chr1:41284311-41284328	HGMD	47	CGGCGGTCCATGCGCACCAT	9.943	11.625	no_activity	1.911	0	0	0	no_activity	no_activity
10	p.T223_G228del	c.667_684del18	chr1:41284311-41284328	HGMD	48	CGGCGGCTCAGTGGTCTACG	no_activity	no_activity	16.706	no_activity	no_activity	no_activity	no_activity	37.304	25.497
10	p.T223_G228del	c.667_684del18	chr1:41284311-41284328	HGMD	49	TGCGCATGGACCGCCGCGGC	9.883	5.879	5.756	1.708	0.223	1.55	0	18.009	8.544
10	p.T223_G228del	c.667_684del18	chr1:41284311-41284328	HGMD	50	CGCGGCGGTCCATGCGCACC	9.866	6.18	no_activity	1.505	1.993	0	0	5.694	no_activity
10	p.T223_G228del	c.667_684del18	chr1:41284311-41284328	HGMD	51	TGCGCATGGTGCGCATGGAC	7.803	4.217	10.45	1.228	0	0	0	15.357	5.973
10	p.T223_G228del	c.667_684del18	chr1:41284311-41284328	HGMD	52	AGCCGCCGCGGCGGTCCATG	no_activity	no_activity	13.395	no_activity	no_activity	no_activity	no_activity	35.811	28.436
10	p.T223_G228del	c.667_684del18	chr1:41284311-41284328	HGMD	53	TGCAGATCCTGCGCATGGTG	no_activity	no_activity	2.417	no_activity	no_activity	no_activity	no_activity	16.114	7.066
10	p.T223_G228del	c.667_684del18	chr1:41284311-41284328	HGMD	54	ACCATGCGCAGGATCTGCAG	no_activity	no_activity	no_activity	no_activity	no_activity	no_activity	no_activity	37.762	40.192
10	p.T223_G228del	c.667_684del18	chr1:41284311-41284328	HGMD	55	TGAGCCGCCGCGGCGGTCCA	no_activity	no_activity	no_activity	no_activity	no_activity	no_activity	no_activity	36.716	47.13
10	p.T223_G228del	c.667_684del18	chr1:41284311-41284328	HGMD	56	TTCCTGCAGATCCTGCGCAT	no_activity	no_activity	21.752	no_activity	no_activity	no_activity	no_activity	43.662	31.66
10	p.T223_G228del	c.667_684del18	chr1:41284311-41284328	HGMD	57	TCAGTGGTCTACGCGCATAG	no_activity	no_activity	no_activity	no_activity	no_activity	no_activity	no_activity	29.687	41.772
10	p.T223_G228del	c.667_684del18	chr1:41284311-41284328	HGMD	58	GCGGCGGCTCAGTGGTCTAC	5.09	5.808	no_activity	4.836	1.707	1.038	0	no_activity	no_activity
10	p.T223_G228del	c.667_684del18	chr1:41284311-41284328	HGMD	59	ATGCGCGTAGACCACTGAGC	5.01	6.173	16.865	3.682	0.354	2.131	0	21.68	9.31
10	p.T223_G228del	c.667_684del18	chr1:41284311-41284328	HGMD	60	GACCGCCGCGGCGGCTCAGT	no_activity	no_activity	20.12	no_activity	no_activity	no_activity	no_activity	20.385	no_activity
10	p.T223_G228del	c.667_684del18	chr1:41284311-41284328	HGMD	61	TGCGCACCATGCGCAGGATC	no_activity	no_activity	0.787	no_activity	no_activity	no_activity	no_activity	21.439	11.327
10	p.T223_G228del	c.667_684del18	chr1:41284311-41284328	HGMD	62	TGGTGCGCATGGACCGCCGC	3.888	1.201	0.43	0	0	0	0	24.865	14.92
10	p.T223_G228del	c.667_684del18	chr1:41284311-41284328	HGMD	63	CTGAGCCGCCGCGGCGGTCC	3.54	2.17	no_activity	0	0	0	0	1.788	no_activity
10	p.T223_G228del	c.667_684del18	chr1:41284311-41284328	HGMD	64	GAGCCGCCGCGGCGGTCCAT	3.503	12.514	no_activity	14.54	3.182	1	1.768	no_activity	no_activity
10	p.T223_G228del	c.667_684del18	chr1:41284311-41284328	HGMD	65	GACCACTGAGCCGCCGCGGC	no_activity	no_activity	16.596	no_activity	no_activity	no_activity	no_activity	20.872	no_activity
10	p.T223_G228del	c.667_684del18	chr1:41284311-41284328	HGMD	66	CGCGTAGACCACTGAGCCGC	no_activity	no_activity	0.887	no_activity	no_activity	no_activity	no_activity	28.876	27.017
10	p.T223_G228del	c.667_684del18	chr1:41284311-41284328	HGMD	67	CGGCTCAGTGGTCTACGCGC	no_activity	no_activity	no_activity	no_activity	no_activity	no_activity	no_activity	22.338	17.558
10	p.T223_G228del	c.667_684del18	chr1:41284311-41284328	HGMD	68	GCATGGTGCGCATGGACCGC	no_activity	no_activity	1.589	no_activity	no_activity	no_activity	no_activity	29.216	23.612
10	p.T223_G228del	c.667_684del18	chr1:41284311-41284328	HGMD	69	TCCATGCGCACCATGCGCAG	no_activity	no_activity	14.332	no_activity	no_activity	no_activity	no_activity	18.329	no_activity
10	p.T223_G228del	c.667_684del18	chr1:41284311-41284328	HGMD	70	CTCACCTTGCTATGCGCGTA	no_activity	no_activity	7.225	no_activity	no_activity	no_activity	no_activity	15.068	no_activity
10	p.T223_G228del	c.667_684del18	chr1:41284311-41284328	HGMD	71	GCCGCGGCGGCTCAGTGGTC	no_activity	no_activity	no_activity	no_activity	no_activity	no_activity	no_activity	5.342	no_activity
10	p.T223_G228del	c.667_684del18	chr1:41284311-41284328	HGMD	72	GCGCACCATGCGCAGGATCT	no_activity	no_activity	no_activity	no_activity	no_activity	no_activity	no_activity	3.277	12.084
10	p.T223_G228del	c.667_684del18	chr1:41284311-41284328	HGMD	73	CCGCCGCGGCGGTCCATGCG	no_activity	no_activity	no_activity	no_activity	no_activity	no_activity	no_activity	0	no_activity
10	p.T223_G228del	c.667_684del18	chr1:41284311-41284328	HGMD	74	CCGCGGCGGTCCATGCGCAC	no_activity	no_activity	no_activity	no_activity	no_activity	no_activity	no_activity	34.511	no_activity
10	p.T223_G228del	c.667_684del18	chr1:41284311-41284328	HGMD	75	ATGGACCGCCGCGGCGGCTC	no_activity	no_activity	1.244	no_activity	no_activity	no_activity	no_activity	38.043	24.216
10	p.T223_G228del	c.667_684del18	chr1:41284311-41284328	HGMD	76	TCCTGCGCATGGTGCGCATG	no_activity	no_activity	7.167	no_activity	no_activity	no_activity	no_activity	8.622	no_activity
10	p.T223_G228del	c.667_684del18	chr1:41284311-41284328	HGMD	77	GCGGTCCATGCGCACCATGC	no_activity	no_activity	no_activity	no_activity	no_activity	no_activity	no_activity	4.16	11.021
10	p.T223_G228del	c.667_684del18	chr1:41284311-41284328	HGMD	78	CCTTGCTATGCGCGTAGACC	no_activity	no_activity	no_activity	no_activity	no_activity	no_activity	no_activity	2.629	no_activity
10	p.T223_G228del	c.667_684del18	chr1:41284311-41284328	HGMD	79	GCGGCTCAGTGGTCTACGCG	no_activity	no_activity	no_activity	no_activity	no_activity	no_activity	no_activity	7.963	no_activity
10	p.T223_G228del	c.667_684del18	chr1:41284311-41284328	HGMD	80	ACCTTGCTATGCGCGTAGAC	no_activity	no_activity	no_activity	no_activity	no_activity	no_activity	no_activity	5.279	no_activity
10	p.T223_G228del	c.667_684del18	chr1:41284311-41284328	HGMD	81	ACTGAGCCGCCGCGGCGGTC	no_activity	no_activity	no_activity	no_activity	no_activity	no_activity	no_activity	17.938	no_activity
10	p.T223_G228del	c.667_684del18	chr1:41284311-41284328	HGMD	82	CAGATCCTGCGCATGGTGCG	no_activity	no_activity	no_activity	no_activity	no_activity	no_activity	no_activity	23.529	no_activity
11	p.V230E	c.689T>A	chr1:41284333	ClinVar and HGMD	1	CTGGAAGCTGCTGGGCTCAG	63.332	56.406	44.148	1.495	1.804	13.959	0	44.847	45.604
11	p.V230E	c.689T>A	chr1:41284333	ClinVar and HGMD	2	AGAGGTCTACGCGCATAGCA	58.94	55.524	39.728	53.79	45.876	53.598	2.777	44.759	35.539
11	p.V230E	c.689T>A	chr1:41284333	ClinVar and HGMD	3	CTCTGAGCCCAGCAGCTTCC	56.753	53.474	32	7.167	8.903	25.186	2.26	43.295	25.7
11	p.V230E	c.689T>A	chr1:41284333	ClinVar and HGMD	4	TCTACGCGCATAGCAAGGTG	53.589	52.462	40.735	23.474	18.345	42.531	0.175	39.791	36.477
11	p.V230E	c.689T>A	chr1:41284333	ClinVar and HGMD	5	TGGACCGCCGCGGCGGCACC	45.168	43.107	9.804	8.86	0.044	5.353	0	17.603	5.648
11	p.V230E	c.689T>A	chr1:41284333	ClinVar and HGMD	6	GTCTACGCGCATAGCAAGGT	41.833	34.146	24.373	29.787	20.66	5.887	1.757	39.794	29.192
11	p.V230E	c.689T>A	chr1:41284333	ClinVar and HGMD	7	GCTTCCAGGTGCCGCCGCGG	37.46	41.841	19.783	37.937	35.738	35.084	28.104	29.788	17.79
11	p.V230E	c.689T>A	chr1:41284333	ClinVar and HGMD	8	CAGAGGTCTACGCGCATAGC	36.181	31.476	4.336	1.364	0	5.161	0.127	30.461	9.71
11	p.V230E	c.689T>A	chr1:41284333	ClinVar and HGMD	9	GCGTAGACCTCTGAGCCCAG	35.658	32.971	34.931	37.507	26.847	22.559	0.376	30.393	no_activity
11	p.V230E	c.689T>A	chr1:41284333	ClinVar and HGMD	10	CCTCTGAGCCCAGCAGCTTC	34.619	33.412	12.262	14.817	2.505	8.081	0	33.629	10.835
11	p.V230E	c.689T>A	chr1:41284333	ClinVar and HGMD	11	GGCTCAGAGGTCTACGCGCA	33.352	31.791	15.138	21.001	0.928	5.303	0	14.672	no_activity
11	p.V230E	c.689T>A	chr1:41284333	ClinVar and HGMD	12	GGTCTACGCGCATAGCAAGG	32.717	29.572	18.882	27.471	26.228	22.807	8.284	46.623	55.738
11	p.V230E	c.689T>A	chr1:41284333	ClinVar and HGMD	13	TGCTATGCGCGTAGACCTCT	31.043	24.434	21.109	3.775	0	2.019	0	30.808	11.157
11	p.V230E	c.689T>A	chr1:41284333	ClinVar and HGMD	14	CCTGGAAGCTGCTGGGCTCA	30.711	30.469	12.861	1.816	0	5.669	0.007	37.162	13.245
11	p.V230E	c.689T>A	chr1:41284333	ClinVar and HGMD	15	TGCGCGTAGACCTCTGAGCC	30.522	28.646	8.686	7.952	0.048	4.014	0	4.003	no_activity
11	p.V230E	c.689T>A	chr1:41284333	ClinVar and HGMD	16	ACCGCCGCGGCGGCACCTGG	27.513	31.687	19.371	25.337	12.453	16.748	2.268	14.47	no_activity
11	p.V230E	c.689T>A	chr1:41284333	ClinVar and HGMD	17	GCTATGCGCGTAGACCTCTG	no_activity	no_activity	31.872	no_activity	no_activity	no_activity	no_activity	39.146	40.277
11	p.V230E	c.689T>A	chr1:41284333	ClinVar and HGMD	18	GCCTCACCTTGCTATGCGCG	21.633	14.741	no_activity	11.529	13.151	3.008	0	9.406	6.195
11	p.V230E	c.689T>A	chr1:41284333	ClinVar and HGMD	19	CTGAGCCCAGCAGCTTCCAG	21.499	14.53	5.019	0.221	0	0	0	15.761	no_activity
11	p.V230E	c.689T>A	chr1:41284333	ClinVar and HGMD	20	ATGGACCGCCGCGGCGGCAC	21.187	15.832	no_activity	1.457	0.985	0	0	14.998	no_activity
11	p.V230E	c.689T>A	chr1:41284333	ClinVar and HGMD	21	CATAGCAAGGTGAGGCCTGC	21.145	13.283	2.879	0.442	0	0	0	14.089	no_activity
11	p.V230E	c.689T>A	chr1:41284333	ClinVar and HGMD	22	CTACGCGCATAGCAAGGTGA	20.837	14.575	27.442	0.96	0	0	0	20.357	8.582
11	p.V230E	c.689T>A	chr1:41284333	ClinVar and HGMD	23	ATAGCAAGGTGAGGCCTGCA	no_activity	no_activity	38.865	no_activity	no_activity	no_activity	no_activity	42.503	31.637
11	p.V230E	c.689T>A	chr1:41284333	ClinVar and HGMD	24	ACCTGGAAGCTGCTGGGCTC	19.701	23.083	8.623	10.804	2.195	3.373	0.558	31.504	45.296
11	p.V230E	c.689T>A	chr1:41284333	ClinVar and HGMD	25	TTGCTATGCGCGTAGACCTC	19.634	15.325	13.525	4.268	1.051	2.176	0.324	36.222	44.12
11	p.V230E	c.689T>A	chr1:41284333	ClinVar and HGMD	26	GGACCGCCGCGGCGGCACCT	19.109	23.006	21.222	17.473	11.982	10.833	6.59	35.947	45.103
11	p.V230E	c.689T>A	chr1:41284333	ClinVar and HGMD	27	CACCTGGAAGCTGCTGGGCT	18.917	21.636	0.246	0	0	0	0	0	no_activity
11	p.V230E	c.689T>A	chr1:41284333	ClinVar and HGMD	28	AGGTCTACGCGCATAGCAAG	18.329	19.835	no_activity	13.838	9.438	8.898	0	10.468	no_activity
11	p.V230E	c.689T>A	chr1:41284333	ClinVar and HGMD	29	TGAGCCCAGCAGCTTCCAGG	18.002	13.323	29.843	8.888	3.504	9.112	0	41.348	27.571
11	p.V230E	c.689T>A	chr1:41284333	ClinVar and HGMD	30	TCTGAGCCCAGCAGCTTCCA	no_activity	no_activity	23.789	no_activity	no_activity	no_activity	no_activity	48.583	43.597
11	p.V230E	c.689T>A	chr1:41284333	ClinVar and HGMD	31	CTTGCAGGCCTCACCTTGCT	16.641	9.432	no_activity	0	0	0	0	9.541	no_activity
11	p.V230E	c.689T>A	chr1:41284333	ClinVar and HGMD	32	GCTGGGCTCAGAGGTCTACG	no_activity	no_activity	30.352	no_activity	no_activity	no_activity	no_activity	44.73	38.041
11	p.V230E	c.689T>A	chr1:41284333	ClinVar and HGMD	33	CTGCTGGGCTCAGAGGTCTA	no_activity	no_activity	24.268	no_activity	no_activity	no_activity	no_activity	40.273	53.704
11	p.V230E	c.689T>A	chr1:41284333	ClinVar and HGMD	34	CCTCACCTTGCTATGCGCGT	13.668	10.376	8.161	0.257	0	0.603	0	21.782	22.096
11	p.V230E	c.689T>A	chr1:41284333	ClinVar and HGMD	35	GCTCAGAGGTCTACGCGCAT	no_activity	no_activity	7.616	no_activity	no_activity	no_activity	no_activity	20.874	17.535
11	p.V230E	c.689T>A	chr1:41284333	ClinVar and HGMD	36	GCAGGCCTCACCTTGCTATG	no_activity	no_activity	12.89	no_activity	no_activity	no_activity	no_activity	47.433	50.35
11	p.V230E	c.689T>A	chr1:41284333	ClinVar and HGMD	37	CTTGCTATGCGCGTAGACCT	no_activity	no_activity	no_activity	no_activity	no_activity	no_activity	no_activity	6.796	no_activity
11	p.V230E	c.689T>A	chr1:41284333	ClinVar and HGMD	38	GAGGTCTACGCGCATAGCAA	no_activity	no_activity	11.589	no_activity	no_activity	no_activity	no_activity	44.975	35.235
11	p.V230E	c.689T>A	chr1:41284333	ClinVar and HGMD	39	GCGGCTTGCAGGCCTCACCT	no_activity	no_activity	18.778	no_activity	no_activity	no_activity	no_activity	34.585	33.718
11	p.V230E	c.689T>A	chr1:41284333	ClinVar and HGMD	40	TGGAAGCTGCTGGGCTCAGA	no_activity	no_activity	26.171	no_activity	no_activity	no_activity	no_activity	31.011	no_activity
11	p.V230E	c.689T>A	chr1:41284333	ClinVar and HGMD	41	CGCGCATAGCAAGGTGAGGC	9.848	6.612	no_activity	0.397	0.472	0	0	no_activity	no_activity
11	p.V230E	c.689T>A	chr1:41284333	ClinVar and HGMD	42	TGCCGCCGCGGCGGTCCATG	no_activity	no_activity	10.762	no_activity	no_activity	no_activity	no_activity	34.317	25.121
11	p.V230E	c.689T>A	chr1:41284333	ClinVar and HGMD	43	TGCGCATGGACCGCCGCGGC	8.728	5.804	6.176	1.538	0.234	2.059	0	23.22	10.015
11	p.V230E	c.689T>A	chr1:41284333	ClinVar and HGMD	44	CCGCCGCGGCGGCACCTGGA	no_activity	no_activity	16.309	no_activity	no_activity	no_activity	no_activity	41.611	34.624
11	p.V230E	c.689T>A	chr1:41284333	ClinVar and HGMD	45	GGTGCCGCCGCGGCGGTCCA	no_activity	no_activity	no_activity	no_activity	no_activity	no_activity	no_activity	39.407	47.137
11	p.V230E	c.689T>A	chr1:41284333	ClinVar and HGMD	46	TTGCAGGCCTCACCTTGCTA	no_activity	no_activity	no_activity	no_activity	no_activity	no_activity	no_activity	39.239	44.516
11	p.V230E	c.689T>A	chr1:41284333	ClinVar and HGMD	47	TGCTGGGCTCAGAGGTCTAC	5.932	6.309	no_activity	0	0	0	0	no_activity	no_activity
11	p.V230E	c.689T>A	chr1:41284333	ClinVar and HGMD	48	TCAGAGGTCTACGCGCATAG	no_activity	no_activity	no_activity	no_activity	no_activity	no_activity	no_activity	31.19	43.69
11	p.V230E	c.689T>A	chr1:41284333	ClinVar and HGMD	49	GCAAGGTGAGGCCTGCAAGC	no_activity	no_activity	10.839	no_activity	no_activity	no_activity	no_activity	38.694	37.864
11	p.V230E	c.689T>A	chr1:41284333	ClinVar and HGMD	50	AGGTGCCGCCGCGGCGGTCC	4.73	7.139	no_activity	0	0	0	0	5.421	no_activity
11	p.V230E	c.689T>A	chr1:41284333	ClinVar and HGMD	51	GCGCATAGCAAGGTGAGGCC	no_activity	no_activity	0	no_activity	no_activity	no_activity	no_activity	10.111	6.836
11	p.V230E	c.689T>A	chr1:41284333	ClinVar and HGMD	52	CAAGGTGAGGCCTGCAAGCC	3.342	6.368	no_activity	0.469	0	0	0	no_activity	no_activity
11	p.V230E	c.689T>A	chr1:41284333	ClinVar and HGMD	53	GACCGCCGCGGCGGCACCTG	no_activity	no_activity	no_activity	no_activity	no_activity	no_activity	no_activity	27.441	35.041
11	p.V230E	c.689T>A	chr1:41284333	ClinVar and HGMD	54	AGGCCTCACCTTGCTATGCG	no_activity	no_activity	9.688	no_activity	no_activity	no_activity	no_activity	41.837	no_activity
11	p.V230E	c.689T>A	chr1:41284333	ClinVar and HGMD	55	CAGGCCTCACCTTGCTATGC	no_activity	no_activity	no_activity	no_activity	no_activity	no_activity	no_activity	2.31	no_activity
11	p.V230E	c.689T>A	chr1:41284333	ClinVar and HGMD	56	CTTCCAGGTGCCGCCGCGGC	no_activity	no_activity	16.563	no_activity	no_activity	no_activity	no_activity	19.716	no_activity
11	p.V230E	c.689T>A	chr1:41284333	ClinVar and HGMD	57	GCGCGTAGACCTCTGAGCCC	no_activity	no_activity	3.183	no_activity	no_activity	no_activity	no_activity	22.039	15.175
11	p.V230E	c.689T>A	chr1:41284333	ClinVar and HGMD	58	CGCGTAGACCTCTGAGCCCA	no_activity	no_activity	no_activity	no_activity	no_activity	no_activity	no_activity	11.923	18.914
11	p.V230E	c.689T>A	chr1:41284333	ClinVar and HGMD	59	GGGCTCAGAGGTCTACGCGC	no_activity	no_activity	no_activity	no_activity	no_activity	no_activity	no_activity	24.057	21.769
11	p.V230E	c.689T>A	chr1:41284333	ClinVar and HGMD	60	ACCTCTGAGCCCAGCAGCTT	no_activity	no_activity	no_activity	no_activity	no_activity	no_activity	no_activity	no_activity	13.442
11	p.V230E	c.689T>A	chr1:41284333	ClinVar and HGMD	61	GTGCCGCCGCGGCGGTCCAT	1.401	10.928	no_activity	15.081	3.646	2.755	0	no_activity	no_activity
11	p.V230E	c.689T>A	chr1:41284333	ClinVar and HGMD	62	AGCTGCTGGGCTCAGAGGTC	no_activity	no_activity	no_activity	no_activity	no_activity	no_activity	no_activity	12.152	no_activity
11	p.V230E	c.689T>A	chr1:41284333	ClinVar and HGMD	63	GCATAGCAAGGTGAGGCCTG	no_activity	no_activity	no_activity	no_activity	no_activity	no_activity	no_activity	30.781	30.235
11	p.V230E	c.689T>A	chr1:41284333	ClinVar and HGMD	64	ATGCGCGTAGACCTCTGAGC	no_activity	no_activity	no_activity	no_activity	no_activity	no_activity	no_activity	no_activity	14.378
11	p.V230E	c.689T>A	chr1:41284333	ClinVar and HGMD	65	CGTAGACCTCTGAGCCCAGC	no_activity	no_activity	0.95	no_activity	no_activity	no_activity	no_activity	29.177	8.082
11	p.V230E	c.689T>A	chr1:41284333	ClinVar and HGMD	66	CGCATGGACCGCCGCGGCGG	no_activity	no_activity	no_activity	no_activity	no_activity	no_activity	no_activity	4.177	no_activity
11	p.V230E	c.689T>A	chr1:41284333	ClinVar and HGMD	67	GGCCTCACCTTGCTATGCGC	no_activity	no_activity	no_activity	no_activity	no_activity	no_activity	no_activity	24.771	11.009
11	p.V230E	c.689T>A	chr1:41284333	ClinVar and HGMD	68	CCGCCGCGGCGGTCCATGCG	no_activity	no_activity	no_activity	no_activity	no_activity	no_activity	no_activity	0	no_activity
11	p.V230E	c.689T>A	chr1:41284333	ClinVar and HGMD	69	TGCAGGCCTCACCTTGCTAT	0.366	4.319	no_activity	1.127	0	0	0	no_activity	no_activity
11	p.V230E	c.689T>A	chr1:41284333	ClinVar and HGMD	70	CGCCGCGGCGGCACCTGGAA	no_activity	no_activity	no_activity	no_activity	no_activity	no_activity	no_activity	11.764	no_activity
11	p.V230E	c.689T>A	chr1:41284333	ClinVar and HGMD	71	CAGGTGCCGCCGCGGCGGTC	no_activity	no_activity	no_activity	no_activity	no_activity	no_activity	no_activity	15.384	no_activity
11	p.V230E	c.689T>A	chr1:41284333	ClinVar and HGMD	72	TGGGCTCAGAGGTCTACGCG	no_activity	no_activity	no_activity	no_activity	no_activity	no_activity	no_activity	15.948	no_activity
11	p.V230E	c.689T>A	chr1:41284333	ClinVar and HGMD	73	CTCACCTTGCTATGCGCGTA	no_activity	no_activity	2.423	no_activity	no_activity	no_activity	no_activity	14.702	no_activity
11	p.V230E	c.689T>A	chr1:41284333	ClinVar and HGMD	74	GCTTGCAGGCCTCACCTTGC	no_activity	no_activity	no_activity	no_activity	no_activity	no_activity	no_activity	26.863	no_activity
12	p.H234R	c.701A>G	chr1:41284345	ClinVar and HGMD	1	CTGGAAGCTGCTGGGCTCAG	62.283	55.021	42.964	0	0.194	8.893	0	44.847	46.255
12	p.H234R	c.701A>G	chr1:41284345	ClinVar and HGMD	2	GGCGGCACCTGGAAGCTGCT	62.022	58.71	49.745	52.834	51.619	42.385	20.271	48.934	37.56
12	p.H234R	c.701A>G	chr1:41284345	ClinVar and HGMD	3	CACTGAGCCCAGCAGCTTCC	56.586	53.7	33.335	20.789	10.477	30.078	4.539	42.253	27.965
12	p.H234R	c.701A>G	chr1:41284345	ClinVar and HGMD	4	AGTGGTCTACGCGCGTAGCA	53.87	50.285	35.059	49.634	39.028	46.596	3.256	38.251	27.9
12	p.H234R	c.701A>G	chr1:41284345	ClinVar and HGMD	5	CGGCGGCACCTGGAAGCTGC	52.708	45.354	22.655	32.303	3.746	21.369	0	43.129	30.683
12	p.H234R	c.701A>G	chr1:41284345	ClinVar and HGMD	6	AAGCCGCGCGCGGAGACCCG	51.735	52.899	32.903	43.319	44.002	43.784	24.678	39.536	35.659
12	p.H234R	c.701A>G	chr1:41284345	ClinVar and HGMD	7	GCAGCTTCCAGGTGCCGCCG	51.25	49.172	34.907	48.73	45.585	45.256	30.027	23.245	12.669
12	p.H234R	c.701A>G	chr1:41284345	ClinVar and HGMD	8	AGCCGCGCGCGGAGACCCGA	51.113	51.684	40.199	44.681	29.046	30.299	26.451	33.952	19.102
12	p.H234R	c.701A>G	chr1:41284345	ClinVar and HGMD	9	TCTACGCGCGTAGCAAGGTG	50.641	50.045	37.837	16.453	16.227	36.33	0	37.98	32.509
12	p.H234R	c.701A>G	chr1:41284345	ClinVar and HGMD	10	TGAGGCCTGCAAGCCGCGCG	47.299	46.082	20.564	13.743	3.382	21.636	0	23.826	20.54
12	p.H234R	c.701A>G	chr1:41284345	ClinVar and HGMD	11	CGCCCTCGGGTCTCCGCGCG	44.353	38.402	17.863	2.132	0	0	0	20.539	10.756
12	p.H234R	c.701A>G	chr1:41284345	ClinVar and HGMD	12	GGTCTCCGCGCGCGGCTTGC	41.242	40.977	25.485	34.534	28.258	28.941	2.441	28.356	4.736
12	p.H234R	c.701A>G	chr1:41284345	ClinVar and HGMD	13	GTCTACGCGCGTAGCAAGGT	40.392	32.945	22.602	23.896	16.654	1.868	1.508	38.217	24.779
12	p.H234R	c.701A>G	chr1:41284345	ClinVar and HGMD	14	GCGTAGACCACTGAGCCCAG	37.137	34.163	35.804	39.528	25.418	23.787	1.077	33.383	no_activity
12	p.H234R	c.701A>G	chr1:41284345	ClinVar and HGMD	15	TGCTACGCGCGTAGACCACT	34.535	28.152	31.304	8.197	1.887	4.643	0	34.316	17.482
12	p.H234R	c.701A>G	chr1:41284345	ClinVar and HGMD	16	CCACTGAGCCCAGCAGCTTC	34.052	34.035	13.48	12.545	2.166	4.937	0	32.8	12.463
12	p.H234R	c.701A>G	chr1:41284345	ClinVar and HGMD	17	CGCGCGTAGACCACTGAGCC	31.579	28.034	8.147	0	0.191	0.376	0	3.173	no_activity
12	p.H234R	c.701A>G	chr1:41284345	ClinVar and HGMD	18	CAAGCCGCGCGCGGAGACCC	30.727	32.36	13.045	16.71	12.93	13.841	0	24.247	25.717
12	p.H234R	c.701A>G	chr1:41284345	ClinVar and HGMD	19	CAGTGGTCTACGCGCGTAGC	30.446	29.024	3.839	0	0	0.985	0.006	30.114	7.422
12	p.H234R	c.701A>G	chr1:41284345	ClinVar and HGMD	20	GGTCTACGCGCGTAGCAAGG	29.166	30.059	17.517	25.644	24.273	20.8	5.662	46.551	55.608
12	p.H234R	c.701A>G	chr1:41284345	ClinVar and HGMD	21	GGCTCAGTGGTCTACGCGCG	29.08	27.845	13.413	19.51	2.984	4.34	0	12.033	no_activity
12	p.H234R	c.701A>G	chr1:41284345	ClinVar and HGMD	22	AGCAGCTTCCAGGTGCCGCC	28.506	16.152	no_activity	1.592	0.755	0	0	11.95	no_activity
12	p.H234R	c.701A>G	chr1:41284345	ClinVar and HGMD	23	AGCTTCCAGGTGCCGCCGCG	26.044	20.476	no_activity	3.904	0.005	0.238	0	21.773	no_activity
12	p.H234R	c.701A>G	chr1:41284345	ClinVar and HGMD	24	AGGCCTGCAAGCCGCGCGCG	25.918	30.749	14.277	20.627	11.114	14.648	0	29.559	25.162
12	p.H234R	c.701A>G	chr1:41284345	ClinVar and HGMD	25	GCCGCGCGCGGAGACCCGAG	24.442	26.488	20.886	16.497	13.738	16.475	6.703	46.227	46.17
12	p.H234R	c.701A>G	chr1:41284345	ClinVar and HGMD	26	CTGAGCCCAGCAGCTTCCAG	24.253	15.402	5.125	0	0	0	0	16.866	no_activity
12	p.H234R	c.701A>G	chr1:41284345	ClinVar and HGMD	27	GCTACGCGCGTAGACCACTG	no_activity	no_activity	32.072	no_activity	no_activity	no_activity	no_activity	36.52	39.867
12	p.H234R	c.701A>G	chr1:41284345	ClinVar and HGMD	28	GTAGCAAGGTGAGGCCTGCA	no_activity	no_activity	40.154	no_activity	no_activity	no_activity	no_activity	41.505	32.367
12	p.H234R	c.701A>G	chr1:41284345	ClinVar and HGMD	29	TTGCTACGCGCGTAGACCAC	23.095	16.796	15.073	4.025	0.811	1.805	0.187	35.548	45.862
12	p.H234R	c.701A>G	chr1:41284345	ClinVar and HGMD	30	GTGAGGCCTGCAAGCCGCGC	22.21	16.321	no_activity	6.773	1.199	0.035	0	6.604	no_activity
12	p.H234R	c.701A>G	chr1:41284345	ClinVar and HGMD	31	GCCTCACCTTGCTACGCGCG	21.838	16.33	no_activity	11.569	13.244	3.676	0	14.404	8.835
12	p.H234R	c.701A>G	chr1:41284345	ClinVar and HGMD	32	CCTGGAAGCTGCTGGGCTCA	21.578	14.301	no_activity	0	0	0	0	29.257	no_activity
12	p.H234R	c.701A>G	chr1:41284345	ClinVar and HGMD	33	CTACGCGCGTAGCAAGGTGA	21.188	14.372	25.648	0.685	0.175	0	0	19.948	9.745
12	p.H234R	c.701A>G	chr1:41284345	ClinVar and HGMD	34	GGGTCTCCGCGCGCGGCTTG	20.716	25.342	7.35	11.222	1.785	0.311	0	25.879	4.278
12	p.H234R	c.701A>G	chr1:41284345	ClinVar and HGMD	35	GCGGCGGCACCTGGAAGCTG	20.117	25.051	no_activity	13.112	2.715	6.543	0	11.5	no_activity
12	p.H234R	c.701A>G	chr1:41284345	ClinVar and HGMD	36	CGTAGCAAGGTGAGGCCTGC	18.835	12.664	2.963	0.622	0	0	0	15.03	no_activity
12	p.H234R	c.701A>G	chr1:41284345	ClinVar and HGMD	37	GCTGGGCTCAGTGGTCTACG	no_activity	no_activity	21.415	no_activity	no_activity	no_activity	no_activity	48.742	56.56
12	p.H234R	c.701A>G	chr1:41284345	ClinVar and HGMD	38	TGGTCTACGCGCGTAGCAAG	18.086	15.322	no_activity	3.953	0	4.088	0	11.07	no_activity
12	p.H234R	c.701A>G	chr1:41284345	ClinVar and HGMD	39	ACTGAGCCCAGCAGCTTCCA	no_activity	no_activity	32.794	no_activity	no_activity	no_activity	no_activity	50.178	44.531
12	p.H234R	c.701A>G	chr1:41284345	ClinVar and HGMD	40	GTCTCCGCGCGCGGCTTGCA	17.506	14.049	18.404	7.727	7.537	1.777	2.657	33.194	8.231
12	p.H234R	c.701A>G	chr1:41284345	ClinVar and HGMD	41	CTGCTGGGCTCAGTGGTCTA	no_activity	no_activity	24.784	no_activity	no_activity	no_activity	no_activity	43.787	52.784
12	p.H234R	c.701A>G	chr1:41284345	ClinVar and HGMD	42	TGAGCCCAGCAGCTTCCAGG	16.646	13.882	30.184	7.983	3.716	8.18	0	42.052	27.777
12	p.H234R	c.701A>G	chr1:41284345	ClinVar and HGMD	43	GAGGCCTGCAAGCCGCGCGC	15.631	21.327	6.313	17.549	7.661	10.629	5.481	41.419	43.38
12	p.H234R	c.701A>G	chr1:41284345	ClinVar and HGMD	44	GCGGCACCTGGAAGCTGCTG	15.212	17.436	17.971	9.941	5.13	3.232	1.149	37.309	29.917
12	p.H234R	c.701A>G	chr1:41284345	ClinVar and HGMD	45	ACGCCCTCGGGTCTCCGCGC	14.528	15.311	no_activity	8.413	5.238	3.911	0	10.489	no_activity
12	p.H234R	c.701A>G	chr1:41284345	ClinVar and HGMD	46	CACCTGGAAGCTGCTGGGCT	14.033	21.052	2.118	0	0	0	0	1.183	no_activity
12	p.H234R	c.701A>G	chr1:41284345	ClinVar and HGMD	47	CTTGCTACGCGCGTAGACCA	no_activity	no_activity	no_activity	no_activity	no_activity	no_activity	no_activity	13.656	no_activity
12	p.H234R	c.701A>G	chr1:41284345	ClinVar and HGMD	48	GCAGGCCTCACCTTGCTACG	no_activity	no_activity	16.512	no_activity	no_activity	no_activity	no_activity	46.832	51.172
12	p.H234R	c.701A>G	chr1:41284345	ClinVar and HGMD	49	GGCCTGCAAGCCGCGCGCGG	12.395	16.491	23.885	10.05	0	2.075	0	29.788	29.258
12	p.H234R	c.701A>G	chr1:41284345	ClinVar and HGMD	50	GCGGCTTGCAGGCCTCACCT	no_activity	no_activity	19.432	no_activity	no_activity	no_activity	no_activity	37.173	35.829
12	p.H234R	c.701A>G	chr1:41284345	ClinVar and HGMD	51	GCCCAGCAGCTTCCAGGTGC	11.738	9.186	16.784	6.379	0.273	0.538	0	22.994	13.224
12	p.H234R	c.701A>G	chr1:41284345	ClinVar and HGMD	52	CCTCACCTTGCTACGCGCGT	10.202	9.94	5.231	0.389	0	0.389	0	17.945	23.917
12	p.H234R	c.701A>G	chr1:41284345	ClinVar and HGMD	53	GTGGTCTACGCGCGTAGCAA	no_activity	no_activity	8.917	no_activity	no_activity	no_activity	no_activity	44.65	34.995
12	p.H234R	c.701A>G	chr1:41284345	ClinVar and HGMD	54	CGCGCGTAGCAAGGTGAGGC	9.196	8.204	no_activity	0.538	0.403	0	0	no_activity	no_activity
12	p.H234R	c.701A>G	chr1:41284345	ClinVar and HGMD	55	GGTGAGGCCTGCAAGCCGCG	no_activity	no_activity	3.131	no_activity	no_activity	no_activity	no_activity	34.508	38.848
12	p.H234R	c.701A>G	chr1:41284345	ClinVar and HGMD	56	CACGCCCTCGGGTCTCCGCG	no_activity	no_activity	2.439	no_activity	no_activity	no_activity	no_activity	34.491	36.889
12	p.H234R	c.701A>G	chr1:41284345	ClinVar and HGMD	57	CAGCTTCCAGGTGCCGCCGC	7.753	4.843	2.285	0	0	0	0	24.287	26.631
12	p.H234R	c.701A>G	chr1:41284345	ClinVar and HGMD	58	TTGCAGGCCTCACCTTGCTA	no_activity	no_activity	9.453	no_activity	no_activity	no_activity	no_activity	39.08	42.538
12	p.H234R	c.701A>G	chr1:41284345	ClinVar and HGMD	59	GCTCAGTGGTCTACGCGCGT	no_activity	no_activity	6.94	no_activity	no_activity	no_activity	no_activity	18.244	13.133
12	p.H234R	c.701A>G	chr1:41284345	ClinVar and HGMD	60	GCCGCGGCGGCACCTGGAAG	6.97	14.648	no_activity	3.26	0.809	0.402	0	no_activity	no_activity
12	p.H234R	c.701A>G	chr1:41284345	ClinVar and HGMD	61	TGGAAGCTGCTGGGCTCAGT	no_activity	no_activity	29.065	no_activity	no_activity	no_activity	no_activity	30.217	no_activity
12	p.H234R	c.701A>G	chr1:41284345	ClinVar and HGMD	62	CTGGGCTCAGTGGTCTACGC	no_activity	no_activity	no_activity	no_activity	no_activity	no_activity	no_activity	1.868	no_activity
12	p.H234R	c.701A>G	chr1:41284345	ClinVar and HGMD	63	GCGCGCGGAGACCCGAGGGC	6.452	6.468	no_activity	0.859	0	0	0	10.471	no_activity
12	p.H234R	c.701A>G	chr1:41284345	ClinVar and HGMD	64	AAGGTGAGGCCTGCAAGCCG	no_activity	no_activity	15.154	no_activity	no_activity	no_activity	no_activity	36.822	39.594
12	p.H234R	c.701A>G	chr1:41284345	ClinVar and HGMD	65	GCAAGCCGCGCGCGGAGACC	5.841	9.374	3.367	1.663	0.291	0	0.735	22.077	36.369
12	p.H234R	c.701A>G	chr1:41284345	ClinVar and HGMD	66	AGGTGAGGCCTGCAAGCCGC	5.509	8.111	no_activity	7.164	2.289	7.053	0	no_activity	no_activity
12	p.H234R	c.701A>G	chr1:41284345	ClinVar and HGMD	67	CCGCGCGCGGAGACCCGAGG	no_activity	no_activity	no_activity	no_activity	no_activity	no_activity	no_activity	1.197	no_activity
12	p.H234R	c.701A>G	chr1:41284345	ClinVar and HGMD	68	GCAAGGTGAGGCCTGCAAGC	no_activity	no_activity	10.661	no_activity	no_activity	no_activity	no_activity	39.304	38.232
12	p.H234R	c.701A>G	chr1:41284345	ClinVar and HGMD	69	GCGCGTAGCAAGGTGAGGCC	no_activity	no_activity	0	no_activity	no_activity	no_activity	no_activity	9.157	5.531
12	p.H234R	c.701A>G	chr1:41284345	ClinVar and HGMD	70	CAAGGTGAGGCCTGCAAGCC	3.8	6.488	no_activity	0.185	0	0	0	no_activity	no_activity
12	p.H234R	c.701A>G	chr1:41284345	ClinVar and HGMD	71	CAGGCCTCACCTTGCTACGC	no_activity	no_activity	no_activity	no_activity	no_activity	no_activity	no_activity	1.63	no_activity
12	p.H234R	c.701A>G	chr1:41284345	ClinVar and HGMD	72	CAGCAGCTTCCAGGTGCCGC	no_activity	no_activity	1.046	no_activity	no_activity	no_activity	no_activity	32.099	31.749
12	p.H234R	c.701A>G	chr1:41284345	ClinVar and HGMD	73	CGCGCGGAGACCCGAGGGCG	no_activity	no_activity	13.393	no_activity	no_activity	no_activity	no_activity	15.175	1.532
12	p.H234R	c.701A>G	chr1:41284345	ClinVar and HGMD	74	GCCCTCGGGTCTCCGCGCGC	2.9	5.867	3.45	0.728	0.692	0.848	0	12.474	4.107
12	p.H234R	c.701A>G	chr1:41284345	ClinVar and HGMD	75	TGCTGGGCTCAGTGGTCTAC	2.699	4.72	no_activity	0	0	0	0	no_activity	no_activity
12	p.H234R	c.701A>G	chr1:41284345	ClinVar and HGMD	76	ACCTGGAAGCTGCTGGGCTC	no_activity	no_activity	4.145	no_activity	no_activity	no_activity	no_activity	33.378	18.961
12	p.H234R	c.701A>G	chr1:41284345	ClinVar and HGMD	77	GCGCGTAGACCACTGAGCCC	no_activity	no_activity	3.734	no_activity	no_activity	no_activity	no_activity	23.506	14.977
12	p.H234R	c.701A>G	chr1:41284345	ClinVar and HGMD	78	ACCACTGAGCCCAGCAGCTT	no_activity	no_activity	no_activity	no_activity	no_activity	no_activity	no_activity	no_activity	14.66
12	p.H234R	c.701A>G	chr1:41284345	ClinVar and HGMD	79	GGGCTCAGTGGTCTACGCGC	no_activity	no_activity	no_activity	no_activity	no_activity	no_activity	no_activity	29.924	24.853
12	p.H234R	c.701A>G	chr1:41284345	ClinVar and HGMD	80	CGCGTAGACCACTGAGCCCA	no_activity	no_activity	no_activity	no_activity	no_activity	no_activity	no_activity	13.005	22.502
12	p.H234R	c.701A>G	chr1:41284345	ClinVar and HGMD	81	CCGCGGCGGCACCTGGAAGC	no_activity	no_activity	0	no_activity	no_activity	no_activity	no_activity	12.358	7.77
12	p.H234R	c.701A>G	chr1:41284345	ClinVar and HGMD	82	CGCGCGCGGAGACCCGAGGG	no_activity	no_activity	9.964	no_activity	no_activity	no_activity	no_activity	32.805	24.675
12	p.H234R	c.701A>G	chr1:41284345	ClinVar and HGMD	83	CGTAGACCACTGAGCCCAGC	no_activity	no_activity	1.538	no_activity	no_activity	no_activity	no_activity	28.078	6.948
12	p.H234R	c.701A>G	chr1:41284345	ClinVar and HGMD	84	CTCACCTTGCTACGCGCGTA	no_activity	no_activity	7.922	no_activity	no_activity	no_activity	no_activity	16.394	no_activity
12	p.H234R	c.701A>G	chr1:41284345	ClinVar and HGMD	85	TGGGCTCAGTGGTCTACGCG	no_activity	no_activity	0	no_activity	no_activity	no_activity	no_activity	40.303	no_activity
12	p.H234R	c.701A>G	chr1:41284345	ClinVar and HGMD	86	GCGTAGCAAGGTGAGGCCTG	no_activity	no_activity	no_activity	no_activity	no_activity	no_activity	no_activity	29.82	30.882
12	p.H234R	c.701A>G	chr1:41284345	ClinVar and HGMD	87	AGCTGCTGGGCTCAGTGGTC	no_activity	no_activity	no_activity	no_activity	no_activity	no_activity	no_activity	12.294	no_activity
12	p.H234R	c.701A>G	chr1:41284345	ClinVar and HGMD	88	CGCGCGCGGCTTGCAGGCCT	no_activity	no_activity	no_activity	no_activity	no_activity	no_activity	no_activity	0	no_activity
12	p.H234R	c.701A>G	chr1:41284345	ClinVar and HGMD	89	GGCCTCACCTTGCTACGCGC	no_activity	no_activity	no_activity	no_activity	no_activity	no_activity	no_activity	24.965	13.414
12	p.H234R	c.701A>G	chr1:41284345	ClinVar and HGMD	90	TCAGTGGTCTACGCGCGTAG	no_activity	no_activity	no_activity	no_activity	no_activity	no_activity	no_activity	19.412	34.079
12	p.H234R	c.701A>G	chr1:41284345	ClinVar and HGMD	91	AGGCCTCACCTTGCTACGCG	no_activity	no_activity	4.091	no_activity	no_activity	no_activity	no_activity	28.437	no_activity
12	p.H234R	c.701A>G	chr1:41284345	ClinVar and HGMD	92	CGGGTCTCCGCGCGCGGCTT	no_activity	no_activity	no_activity	no_activity	no_activity	no_activity	no_activity	0	3.254
12	p.H234R	c.701A>G	chr1:41284345	ClinVar and HGMD	93	TGCAGGCCTCACCTTGCTAC	0.165	4.123	no_activity	0.802	0	0	0	no_activity	no_activity
12	p.H234R	c.701A>G	chr1:41284345	ClinVar and HGMD	94	GCGCGGCTTGCAGGCCTCAC	no_activity	no_activity	no_activity	no_activity	no_activity	no_activity	no_activity	24.565	no_activity
12	p.H234R	c.701A>G	chr1:41284345	ClinVar and HGMD	95	ACGCGCGTAGACCACTGAGC	no_activity	no_activity	no_activity	no_activity	no_activity	no_activity	no_activity	no_activity	8.928
12	p.H234R	c.701A>G	chr1:41284345	ClinVar and HGMD	96	GCCTGCAAGCCGCGCGCGGA	no_activity	no_activity	6.456	no_activity	no_activity	no_activity	no_activity	12.276	no_activity
12	p.H234R	c.701A>G	chr1:41284345	ClinVar and HGMD	97	CCTTGCTACGCGCGTAGACC	no_activity	no_activity	no_activity	no_activity	no_activity	no_activity	no_activity	1.82	no_activity
12	p.H234R	c.701A>G	chr1:41284345	ClinVar and HGMD	98	TCGGGTCTCCGCGCGCGGCT	no_activity	no_activity	1.216	no_activity	no_activity	no_activity	no_activity	0	5.753
12	p.H234R	c.701A>G	chr1:41284345	ClinVar and HGMD	99	CGCGGCGGCACCTGGAAGCT	no_activity	no_activity	no_activity	no_activity	no_activity	no_activity	no_activity	0	no_activity
12	p.H234R	c.701A>G	chr1:41284345	ClinVar and HGMD	100	GCTTGCAGGCCTCACCTTGC	no_activity	no_activity	no_activity	no_activity	no_activity	no_activity	no_activity	18.495	no_activity
12	p.H234R	c.701A>G	chr1:41284345	ClinVar and HGMD	101	ACCTTGCTACGCGCGTAGAC	no_activity	no_activity	no_activity	no_activity	no_activity	no_activity	no_activity	6.007	no_activity
12	p.H234R	c.701A>G	chr1:41284345	ClinVar and HGMD	102	CCTCGGGTCTCCGCGCGCGG	no_activity	no_activity	no_activity	no_activity	no_activity	no_activity	no_activity	14.061	no_activity
13	p.W242*	c.725G>A	chr1:41285035	HGMD	1	CACCAGGAACCCGATGTACT	67.045	61.763	46.891	59.089	41.353	56.524	21.759	37.823	29.524
13	p.W242*	c.725G>A	chr1:41285035	HGMD	2	CAGGAACCCGATGTACTAGG	65.89	62.405	52.711	48.05	34.58	53.565	5.155	51.26	51.937
13	p.W242*	c.725G>A	chr1:41285035	HGMD	3	GGCGGTGATCAGCTCCTGCG	64.754	63.859	56.736	65.246	64.038	62.294	44.39	48.924	37.6
13	p.W242*	c.725G>A	chr1:41285035	HGMD	4	CGCCTAGTACATCGGGTTCC	57.537	50.227	27.023	21.111	1.376	21.717	0.983	39.309	22.792
13	p.W242*	c.725G>A	chr1:41285035	HGMD	5	TAGGCGGTGATCAGCTCCTG	55.779	49.683	26.473	36.94	0	36.276	2.545	34.917	33.511
13	p.W242*	c.725G>A	chr1:41285035	HGMD	6	CTGATCACCGCCTAGTACAT	54.055	51.783	30.578	29.175	17.568	34.429	0	38.165	36.975
13	p.W242*	c.725G>A	chr1:41285035	HGMD	7	AGGCGGTGATCAGCTCCTGC	53.594	47.869	31.997	43.467	39.046	44.167	12.658	42.206	31.645
13	p.W242*	c.725G>A	chr1:41285035	HGMD	8	GTGATCAGCTCCTGCGGGGC	48.901	40.074	24.967	44.86	40.73	21.991	4.108	20.091	12.639
13	p.W242*	c.725G>A	chr1:41285035	HGMD	9	TGATCACCGCCTAGTACATC	48.843	50.249	30.938	22.356	27.43	23.829	0.646	36.032	19.059
13	p.W242*	c.725G>A	chr1:41285035	HGMD	10	CGCCCCTCCGCCTGCCCCGC	47.79	38.152	14.563	39.578	7.531	24.362	0	25.73	23.849
13	p.W242*	c.725G>A	chr1:41285035	HGMD	11	CTCCTGCGGGGCAGGCGGAG	46.786	48.417	30.134	10.729	0	13.055	0	28.563	19.53
13	p.W242*	c.725G>A	chr1:41285035	HGMD	12	GCTCCTGCGGGGCAGGCGGA	45.886	45.43	26.463	42.171	42.688	40.126	14.697	40.856	26.607
13	p.W242*	c.725G>A	chr1:41285035	HGMD	13	ATCAGCTCCTGCGGGGCAGG	45.839	45.027	22.625	31.857	36.417	19.65	3.581	23.35	20.337
13	p.W242*	c.725G>A	chr1:41285035	HGMD	14	GCAGGCGGAGGGGCGCGGTG	39.246	33.036	26.632	38.558	34.507	31.314	15.798	37.396	33.838
13	p.W242*	c.725G>A	chr1:41285035	HGMD	15	AGCTCCTGCGGGGCAGGCGG	38.87	34.507	15.998	37.565	29.242	33.381	1.73	30.103	22.455
13	p.W242*	c.725G>A	chr1:41285035	HGMD	16	GCTGATCACCGCCTAGTACA	37.201	29.803	10.076	23.462	8.838	13.365	0.679	no_activity	no_activity
13	p.W242*	c.725G>A	chr1:41285035	HGMD	17	GCGCCCCTCCGCCTGCCCCG	33.203	33.164	14.832	35.6	28.475	22.322	6.862	27.556	11.97
13	p.W242*	c.725G>A	chr1:41285035	HGMD	18	GCACCAGGAACCCGATGTAC	32.656	30.393	10.524	22.716	19.848	14.104	2.427	32.446	12.335
13	p.W242*	c.725G>A	chr1:41285035	HGMD	19	GGTGATCAGCTCCTGCGGGG	32.552	33.011	22.457	35.522	22.489	21.355	7.39	29.03	15.101
13	p.W242*	c.725G>A	chr1:41285035	HGMD	20	GCCCCTCCGCCTGCCCCGCA	30.624	24.274	20.214	20.082	12.761	5.46	1.644	43.464	48.382
13	p.W242*	c.725G>A	chr1:41285035	HGMD	21	GCGGGGCAGGCGGAGGGGCG	30.506	29.959	15.456	33.906	13.062	25.625	0	24.716	1.761
13	p.W242*	c.725G>A	chr1:41285035	HGMD	22	CCGCCTAGTACATCGGGTTC	30.284	17.2	no_activity	0	0	0	0	19.671	no_activity
13	p.W242*	c.725G>A	chr1:41285035	HGMD	23	CTAGGCGGTGATCAGCTCCT	30.195	24.105	no_activity	9.986	0.063	8.824	0	10.511	no_activity
13	p.W242*	c.725G>A	chr1:41285035	HGMD	24	GAACCCGATGTACTAGGCGG	28.327	21.278	25.425	21.517	13.604	7.831	3.543	35.771	44.739
13	p.W242*	c.725G>A	chr1:41285035	HGMD	25	CCGATGTACTAGGCGGTGAT	27.252	30.42	13.066	0	0	0	0	22.179	no_activity
13	p.W242*	c.725G>A	chr1:41285035	HGMD	26	CCCCTCCGCCTGCCCCGCAG	26.236	30.166	28.497	12.713	0	12.233	0	15.088	14.193
13	p.W242*	c.725G>A	chr1:41285035	HGMD	27	GAAGATGAGCACCAGGAACC	23.663	27.137	18.045	24.566	17.813	14.3	18.317	34.59	42.984
13	p.W242*	c.725G>A	chr1:41285035	HGMD	28	GATCACCGCCTAGTACATCG	no_activity	no_activity	42.405	no_activity	no_activity	no_activity	no_activity	49.401	37.354
13	p.W242*	c.725G>A	chr1:41285035	HGMD	29	AGATGAGCACCAGGAACCCG	no_activity	no_activity	no_activity	no_activity	no_activity	no_activity	no_activity	22.51	no_activity
13	p.W242*	c.725G>A	chr1:41285035	HGMD	30	GATCAGCTCCTGCGGGGCAG	21.453	20.14	no_activity	7.205	0.757	0	0	7.424	no_activity
13	p.W242*	c.725G>A	chr1:41285035	HGMD	31	CAGCTCCTGCGGGGCAGGCG	21.073	24.676	1.794	1.108	0	0	0	10.775	28.221
13	p.W242*	c.725G>A	chr1:41285035	HGMD	32	GGCAGGCGGAGGGGCGCGGT	20.818	20.665	10.277	14.688	5.35	4.813	3.09	26.454	12.588
13	p.W242*	c.725G>A	chr1:41285035	HGMD	33	CGCAGGAGCTGATCACCGCC	19.461	18.151	no_activity	1.943	0	0	0	21.32	no_activity
13	p.W242*	c.725G>A	chr1:41285035	HGMD	34	TCAGCTCCTGCGGGGCAGGC	18.809	12.678	0.132	0	0	0.619	0	29.007	45
13	p.W242*	c.725G>A	chr1:41285035	HGMD	35	CCAGGAACCCGATGTACTAG	17.779	18.557	no_activity	0.338	0	0.265	0	12.033	no_activity
13	p.W242*	c.725G>A	chr1:41285035	HGMD	36	ACCAGGAACCCGATGTACTA	17.58	21.325	13.226	4.848	2.281	2.193	0.126	38.511	47.765
13	p.W242*	c.725G>A	chr1:41285035	HGMD	37	CCTAGTACATCGGGTTCCTG	17.526	12.556	6.576	1.038	0	2.576	0	19.729	no_activity
13	p.W242*	c.725G>A	chr1:41285035	HGMD	38	TACTAGGCGGTGATCAGCTC	16.636	8.674	no_activity	0	0	0	0	no_activity	no_activity
13	p.W242*	c.725G>A	chr1:41285035	HGMD	39	GGAACCCGATGTACTAGGCG	15.092	18.886	no_activity	8.365	0.189	0	0	19.355	no_activity
13	p.W242*	c.725G>A	chr1:41285035	HGMD	40	TGCGGGGCAGGCGGAGGGGC	14.955	7.97	no_activity	1.037	0	0	0	3.488	no_activity
13	p.W242*	c.725G>A	chr1:41285035	HGMD	41	CTAGTACATCGGGTTCCTGG	no_activity	no_activity	27.947	no_activity	no_activity	no_activity	no_activity	41.749	42.54
13	p.W242*	c.725G>A	chr1:41285035	HGMD	42	GCGGTGATCAGCTCCTGCGG	13.027	10.932	10.182	9.778	4.162	6.98	1.816	18.756	12.717
13	p.W242*	c.725G>A	chr1:41285035	HGMD	43	GCCCCGCAGGAGCTGATCAC	12.695	16.333	25.516	6.344	0.427	4.581	1.174	25.603	17.705
13	p.W242*	c.725G>A	chr1:41285035	HGMD	44	TCCGCCTGCCCCGCAGGAGC	12.633	10.278	11.806	3.681	1.066	6.978	0.096	28.421	34.359
13	p.W242*	c.725G>A	chr1:41285035	HGMD	45	GGGGCAGGCGGAGGGGCGCG	11.005	6.428	no_activity	8.544	3.602	7.333	0	4.799	no_activity
13	p.W242*	c.725G>A	chr1:41285035	HGMD	46	GATGAGCACCAGGAACCCGA	no_activity	no_activity	37.929	no_activity	no_activity	no_activity	no_activity	48.915	40.515
13	p.W242*	c.725G>A	chr1:41285035	HGMD	47	TCCTGCGGGGCAGGCGGAGG	9.828	11.503	10.479	4.186	0.492	4.268	0	23.239	24.199
13	p.W242*	c.725G>A	chr1:41285035	HGMD	48	TGATCAGCTCCTGCGGGGCA	9.679	13.487	1.696	0.3	0.232	0	0	23.07	32.02
13	p.W242*	c.725G>A	chr1:41285035	HGMD	49	GGGCAGGCGGAGGGGCGCGG	9.482	3.964	4.617	14.865	7.482	6.514	1.147	23.972	32.956
13	p.W242*	c.725G>A	chr1:41285035	HGMD	50	CCTGCGGGGCAGGCGGAGGG	8.778	10.794	no_activity	8.533	1.47	11.8	0	no_activity	no_activity
13	p.W242*	c.725G>A	chr1:41285035	HGMD	51	GCCTAGTACATCGGGTTCCT	no_activity	no_activity	22.17	no_activity	no_activity	no_activity	no_activity	43.49	37.468
13	p.W242*	c.725G>A	chr1:41285035	HGMD	52	AGGAACCCGATGTACTAGGC	no_activity	no_activity	1.273	no_activity	no_activity	no_activity	no_activity	39.168	22.572
13	p.W242*	c.725G>A	chr1:41285035	HGMD	53	ACTAGGCGGTGATCAGCTCC	no_activity	no_activity	no_activity	no_activity	no_activity	no_activity	no_activity	28.987	33.813
13	p.W242*	c.725G>A	chr1:41285035	HGMD	54	CGGGGCAGGCGGAGGGGCGC	no_activity	no_activity	3.74	no_activity	no_activity	no_activity	no_activity	27.443	4.227
13	p.W242*	c.725G>A	chr1:41285035	HGMD	55	CCCTCCGCCTGCCCCGCAGG	no_activity	no_activity	5.881	no_activity	no_activity	no_activity	no_activity	17.078	13.042
13	p.W242*	c.725G>A	chr1:41285035	HGMD	56	CGATGTACTAGGCGGTGATC	no_activity	no_activity	2.875	no_activity	no_activity	no_activity	no_activity	27.773	16.88
13	p.W242*	c.725G>A	chr1:41285035	HGMD	57	AACCCGATGTACTAGGCGGT	no_activity	no_activity	13.03	no_activity	no_activity	no_activity	no_activity	9.041	no_activity
13	p.W242*	c.725G>A	chr1:41285035	HGMD	58	CTGCGGGGCAGGCGGAGGGG	no_activity	no_activity	5.457	no_activity	no_activity	no_activity	no_activity	15.714	17.512
13	p.W242*	c.725G>A	chr1:41285035	HGMD	59	TGAGCACCAGGAACCCGATG	no_activity	no_activity	no_activity	no_activity	no_activity	no_activity	no_activity	8.442	no_activity
13	p.W242*	c.725G>A	chr1:41285035	HGMD	60	CCGCCTGCCCCGCAGGAGCT	no_activity	no_activity	13.333	no_activity	no_activity	no_activity	no_activity	13.188	no_activity
13	p.W242*	c.725G>A	chr1:41285035	HGMD	61	CCGCGCCCCTCCGCCTGCCC	no_activity	no_activity	3.942	no_activity	no_activity	no_activity	no_activity	13.653	6.388
13	p.W242*	c.725G>A	chr1:41285035	HGMD	62	CCTCCGCCTGCCCCGCAGGA	no_activity	no_activity	no_activity	no_activity	no_activity	no_activity	no_activity	16.62	no_activity
13	p.W242*	c.725G>A	chr1:41285035	HGMD	63	AGCTGATCACCGCCTAGTAC	no_activity	no_activity	no_activity	no_activity	no_activity	no_activity	no_activity	1.04	no_activity
13	p.W242*	c.725G>A	chr1:41285035	HGMD	64	AGCACCAGGAACCCGATGTA	no_activity	no_activity	no_activity	no_activity	no_activity	no_activity	no_activity	32.211	31.829
13	p.W242*	c.725G>A	chr1:41285035	HGMD	65	CGGTGATCAGCTCCTGCGGG	no_activity	no_activity	no_activity	no_activity	no_activity	no_activity	no_activity	5.314	1.951
13	p.W242*	c.725G>A	chr1:41285035	HGMD	66	CTCCGCCTGCCCCGCAGGAG	no_activity	no_activity	no_activity	no_activity	no_activity	no_activity	no_activity	7.246	no_activity
13	p.W242*	c.725G>A	chr1:41285035	HGMD	67	CGCGCCCCTCCGCCTGCCCC	no_activity	no_activity	no_activity	no_activity	no_activity	no_activity	no_activity	1.2	5.006
13	p.W242*	c.725G>A	chr1:41285035	HGMD	68	CCGCAGGAGCTGATCACCGC	no_activity	no_activity	no_activity	no_activity	no_activity	no_activity	no_activity	8.981	13.347
13	p.W242*	c.725G>A	chr1:41285035	HGMD	69	GAGCTGATCACCGCCTAGTA	no_activity	no_activity	19.868	no_activity	no_activity	no_activity	no_activity	14.768	no_activity
13	p.W242*	c.725G>A	chr1:41285035	HGMD	70	CCTGCCCCGCAGGAGCTGAT	no_activity	no_activity	no_activity	no_activity	no_activity	no_activity	no_activity	13.286	no_activity
13	p.W242*	c.725G>A	chr1:41285035	HGMD	71	GCAGGAGCTGATCACCGCCT	no_activity	no_activity	15.007	no_activity	no_activity	no_activity	no_activity	34.22	no_activity
13	p.W242*	c.725G>A	chr1:41285035	HGMD	72	TACATCGGGTTCCTGGTGCT	no_activity	no_activity	7.299	no_activity	no_activity	no_activity	no_activity	11.154	no_activity
13	p.W242*	c.725G>A	chr1:41285035	HGMD	73	AAGATGAGCACCAGGAACCC	no_activity	no_activity	no_activity	no_activity	no_activity	no_activity	no_activity	37.225	15.467
14	p.A252P	c.754G>C	chr1:41285064	HGMD	1	CACCAGGAACCCGATGTACC	64.753	59.424	42.103	56.932	40.716	56.004	18.974	37.722	29.024
14	p.A252P	c.754G>C	chr1:41285064	HGMD	2	CAGGAACCCGATGTACCAGG	60.681	57.508	49.378	47.719	34.984	50.222	5.124	49.342	47.215
14	p.A252P	c.754G>C	chr1:41285064	HGMD	3	CGCCTGGTACATCGGGTTCC	58.471	50.156	26.419	33.492	2.6	31.353	1.368	37.557	22.791
14	p.A252P	c.754G>C	chr1:41285064	HGMD	4	CCAGGTAGACCAGGAAGGAG	57.526	55.297	38.562	43.392	40.933	52.291	5.211	37.444	25.117
14	p.A252P	c.754G>C	chr1:41285064	HGMD	5	CCCCTCCTTCCTGGTCTACC	55.13	54.805	36.711	30.047	18.785	34.015	0	33.524	25.557
14	p.A252P	c.754G>C	chr1:41285064	HGMD	6	GCCAGGTAGACCAGGAAGGA	53.698	49.079	35.551	49.895	17.256	35.559	20.627	41.288	40.697
14	p.A252P	c.754G>C	chr1:41285064	HGMD	7	CTGATCACCGCCTGGTACAT	52.795	47.838	24.696	14.298	8.529	22.643	0	36.754	34.326
14	p.A252P	c.754G>C	chr1:41285064	HGMD	8	GCTCATCTTCCCCTCCTTCC	52.045	51.422	35.542	45.897	41.289	42.512	16.008	41.421	27.003
14	p.A252P	c.754G>C	chr1:41285064	HGMD	9	TGATCACCGCCTGGTACATC	51.924	51.361	30.504	27.553	34.869	35.079	0.648	40.407	21.41
14	p.A252P	c.754G>C	chr1:41285064	HGMD	10	AGGAGGGGAAGATGAGCACC	49.953	47.154	28.393	48.097	54.261	55.371	42.904	43.084	24.75
14	p.A252P	c.754G>C	chr1:41285064	HGMD	11	AGCCAGGTAGACCAGGAAGG	48.504	47.199	30.047	48.149	37.743	49.589	25.431	32.832	34.372
14	p.A252P	c.754G>C	chr1:41285064	HGMD	12	CAGCCAGGTAGACCAGGAAG	41.761	39.017	22.457	20.188	1.603	17.075	0	33.84	35.687
14	p.A252P	c.754G>C	chr1:41285064	HGMD	13	GGAGGGGAAGATGAGCACCA	37.036	35.08	45.947	36.449	32.85	40.394	18.692	53.203	52.333
14	p.A252P	c.754G>C	chr1:41285064	HGMD	14	AAGGAGGGGAAGATGAGCAC	35.17	35.703	15.895	34.569	22.527	21.143	25.308	30.855	12.886
14	p.A252P	c.754G>C	chr1:41285064	HGMD	15	GCACCAGGAACCCGATGTAC	34.916	32.576	16.566	26.832	22.073	14.514	2.613	34.281	15.796
14	p.A252P	c.754G>C	chr1:41285064	HGMD	16	GCTGATCACCGCCTGGTACA	33.21	24.498	8.856	20.98	7.212	10.024	0	no_activity	no_activity
14	p.A252P	c.754G>C	chr1:41285064	HGMD	17	ACCAGGAAGGAGGGGAAGAT	32.693	37.004	36.742	19.383	4.209	9.552	0	34.138	20.864
14	p.A252P	c.754G>C	chr1:41285064	HGMD	18	CCGCCTGGTACATCGGGTTC	29.919	19.075	no_activity	0	0	0	0	19.506	no_activity
14	p.A252P	c.754G>C	chr1:41285064	HGMD	19	CCGATGTACCAGGCGGTGAT	28.512	33.034	19.608	0.387	0	0.196	0	22.739	no_activity
14	p.A252P	c.754G>C	chr1:41285064	HGMD	20	TGCTCATCTTCCCCTCCTTC	28.383	12.32	no_activity	0	0.349	0	0	22.731	no_activity
14	p.A252P	c.754G>C	chr1:41285064	HGMD	21	CAGGTAGACCAGGAAGGAGG	27.224	26.195	24.878	16.667	7.211	16.917	2.562	33.402	38.344
14	p.A252P	c.754G>C	chr1:41285064	HGMD	22	GAAGATGAGCACCAGGAACC	25.762	26.324	18.527	27.739	22.594	18.969	25.784	34.487	42.346
14	p.A252P	c.754G>C	chr1:41285064	HGMD	23	GAACCCGATGTACCAGGCGG	25.536	18.575	23.742	17.729	8.541	5.134	2.002	32.494	45.307
14	p.A252P	c.754G>C	chr1:41285064	HGMD	24	TCAGCCAGGTAGACCAGGAA	25.399	21.009	12.115	0	0	1.274	0	35.65	45.828
14	p.A252P	c.754G>C	chr1:41285064	HGMD	25	GGTAGACCAGGAAGGAGGGG	25.061	24.668	6.606	27.565	5.75	8.747	1.609	20.254	23.869
14	p.A252P	c.754G>C	chr1:41285064	HGMD	26	CCAGGAACCCGATGTACCAG	24.92	23.13	no_activity	2.718	0.334	4.282	0	17.209	no_activity
14	p.A252P	c.754G>C	chr1:41285064	HGMD	27	CCTTCCTGGTCTACCTGGCT	24.046	27.442	1.217	0.827	0.71	1.215	0	12.29	13.085
14	p.A252P	c.754G>C	chr1:41285064	HGMD	28	GACCAGGAAGGAGGGGAAGA	23.047	16.117	22.461	19.018	0	4.769	5.695	37.862	41.012
14	p.A252P	c.754G>C	chr1:41285064	HGMD	29	GATCACCGCCTGGTACATCG	no_activity	no_activity	41.281	no_activity	no_activity	no_activity	no_activity	48.996	36.691
14	p.A252P	c.754G>C	chr1:41285064	HGMD	30	AGATGAGCACCAGGAACCCG	no_activity	no_activity	no_activity	no_activity	no_activity	no_activity	no_activity	24.715	no_activity
14	p.A252P	c.754G>C	chr1:41285064	HGMD	31	GTAGACCAGGAAGGAGGGGA	19.988	14.81	14.987	11.29	3.154	2.551	0.66	32.807	34.013
14	p.A252P	c.754G>C	chr1:41285064	HGMD	32	ACCAGGAACCCGATGTACCA	19.27	20.638	15.594	8.9	2.663	2.958	0	39.679	48.592
14	p.A252P	c.754G>C	chr1:41285064	HGMD	33	CCTGGTACATCGGGTTCCTG	18.019	15.331	9.417	3.724	0.528	6.817	0	19.548	no_activity
14	p.A252P	c.754G>C	chr1:41285064	HGMD	34	TCCCCTCCTTCCTGGTCTAC	17.007	6.334	no_activity	0	0.819	0	0	17.493	no_activity
14	p.A252P	c.754G>C	chr1:41285064	HGMD	35	GGAACCCGATGTACCAGGCG	16.153	19.418	no_activity	6.104	0	0	0	23.194	no_activity
14	p.A252P	c.754G>C	chr1:41285064	HGMD	36	AGGTAGACCAGGAAGGAGGG	no_activity	no_activity	no_activity	no_activity	no_activity	no_activity	no_activity	31.503	38.141
14	p.A252P	c.754G>C	chr1:41285064	HGMD	37	TCCTTCCTGGTCTACCTGGC	13.707	8.186	1.031	0.637	0	1.923	0.358	31.146	42.896
14	p.A252P	c.754G>C	chr1:41285064	HGMD	38	CTCCTTCCTGGTCTACCTGG	no_activity	no_activity	no_activity	no_activity	no_activity	no_activity	no_activity	8.147	no_activity
14	p.A252P	c.754G>C	chr1:41285064	HGMD	39	CTGGTACATCGGGTTCCTGG	no_activity	no_activity	24.503	no_activity	no_activity	no_activity	no_activity	40.324	40.477
14	p.A252P	c.754G>C	chr1:41285064	HGMD	40	GATGAGCACCAGGAACCCGA	no_activity	no_activity	37.406	no_activity	no_activity	no_activity	no_activity	49.959	41.348
14	p.A252P	c.754G>C	chr1:41285064	HGMD	41	AGGAACCCGATGTACCAGGC	no_activity	no_activity	1.278	no_activity	no_activity	no_activity	no_activity	40.987	33.043
14	p.A252P	c.754G>C	chr1:41285064	HGMD	42	AGACCAGGAAGGAGGGGAAG	no_activity	no_activity	no_activity	no_activity	no_activity	no_activity	no_activity	19.253	15.872
14	p.A252P	c.754G>C	chr1:41285064	HGMD	43	CTCATCTTCCCCTCCTTCCT	no_activity	no_activity	32.071	no_activity	no_activity	no_activity	no_activity	27.768	no_activity
14	p.A252P	c.754G>C	chr1:41285064	HGMD	44	CCCTCCTTCCTGGTCTACCT	7.905	5.661	10.951	0.313	0	2.345	0	19.726	17.011
14	p.A252P	c.754G>C	chr1:41285064	HGMD	45	GCCTGGTACATCGGGTTCCT	no_activity	no_activity	20.661	no_activity	no_activity	no_activity	no_activity	41.202	35.685
14	p.A252P	c.754G>C	chr1:41285064	HGMD	46	CCAGGAAGGAGGGGAAGATG	no_activity	no_activity	13.56	no_activity	no_activity	no_activity	no_activity	29.839	15.053
14	p.A252P	c.754G>C	chr1:41285064	HGMD	47	GAGGGGAAGATGAGCACCAG	no_activity	no_activity	24.863	no_activity	no_activity	no_activity	no_activity	31.733	no_activity
14	p.A252P	c.754G>C	chr1:41285064	HGMD	48	AGGAAGGAGGGGAAGATGAG	no_activity	no_activity	no_activity	no_activity	no_activity	no_activity	no_activity	13.622	no_activity
14	p.A252P	c.754G>C	chr1:41285064	HGMD	49	TAGACCAGGAAGGAGGGGAA	no_activity	no_activity	no_activity	no_activity	no_activity	no_activity	no_activity	34.563	4.098
14	p.A252P	c.754G>C	chr1:41285064	HGMD	50	AACCCGATGTACCAGGCGGT	no_activity	no_activity	13.39	no_activity	no_activity	no_activity	no_activity	8.805	no_activity
14	p.A252P	c.754G>C	chr1:41285064	HGMD	51	CGATGTACCAGGCGGTGATC	no_activity	no_activity	2.9	no_activity	no_activity	no_activity	no_activity	26.153	15.852
14	p.A252P	c.754G>C	chr1:41285064	HGMD	52	AGCACCAGGAACCCGATGTA	no_activity	no_activity	no_activity	no_activity	no_activity	no_activity	no_activity	no_activity	27.411
14	p.A252P	c.754G>C	chr1:41285064	HGMD	53	AGCTGATCACCGCCTGGTAC	no_activity	no_activity	no_activity	no_activity	no_activity	no_activity	no_activity	0.629	no_activity
14	p.A252P	c.754G>C	chr1:41285064	HGMD	54	CCTCCTTCCTGGTCTACCTG	no_activity	no_activity	no_activity	no_activity	no_activity	no_activity	no_activity	9.554	no_activity
14	p.A252P	c.754G>C	chr1:41285064	HGMD	55	GAGCTGATCACCGCCTGGTA	no_activity	no_activity	13.079	no_activity	no_activity	no_activity	no_activity	11.883	no_activity
14	p.A252P	c.754G>C	chr1:41285064	HGMD	56	GAAGGAGGGGAAGATGAGCA	no_activity	no_activity	no_activity	no_activity	no_activity	no_activity	no_activity	no_activity	11.394
14	p.A252P	c.754G>C	chr1:41285064	HGMD	57	TACATCGGGTTCCTGGTGCT	no_activity	no_activity	6.547	no_activity	no_activity	no_activity	no_activity	11.45	no_activity
14	p.A252P	c.754G>C	chr1:41285064	HGMD	58	AAGATGAGCACCAGGAACCC	no_activity	no_activity	no_activity	no_activity	no_activity	no_activity	no_activity	36.351	15.775
15	p.E260K	c.778G>A	chr1:41285088	ClinVar and HGMD	1	CTTAGCCAGGTAGACCAGGA	57.009	48.768	30.073	1.698	0	19.507	0	34.997	33.643
15	p.E260K	c.778G>A	chr1:41285088	ClinVar and HGMD	2	CGCCTCCTTCCTGGTCTACC	55.918	52.294	34.947	10.865	3.098	14.401	0	31.556	25.081
15	p.E260K	c.778G>A	chr1:41285088	ClinVar and HGMD	3	CCTTCTTAGCCAGGTAGACC	51.501	47.585	21.096	28.831	27.049	44.319	1.09	25.317	14.15
15	p.E260K	c.778G>A	chr1:41285088	ClinVar and HGMD	4	AGGAGGCGAAGATGAGCACC	50.916	51.733	31.289	47.105	54.034	54.395	37.328	44.238	31.416
15	p.E260K	c.778G>A	chr1:41285088	ClinVar and HGMD	5	CCTGGTCTACCTGGCTAAGA	49.507	46.974	32.745	30.444	18.454	41.796	0	42.375	21.595
15	p.E260K	c.778G>A	chr1:41285088	ClinVar and HGMD	6	AGCCAGGTAGACCAGGAAGG	48.79	49.241	38.39	49.648	41.169	52.597	29.5	27.237	25.389
15	p.E260K	c.778G>A	chr1:41285088	ClinVar and HGMD	7	AGTTGGCGTCCTTCTTAGCC	47.714	40.111	25.097	43.021	40.584	43.24	28.314	31.18	17.74
15	p.E260K	c.778G>A	chr1:41285088	ClinVar and HGMD	8	TAGCCAGGTAGACCAGGAAG	43.606	39.093	31.125	19.562	9.643	22.67	0	37.731	31.98
15	p.E260K	c.778G>A	chr1:41285088	ClinVar and HGMD	9	TCTTAGCCAGGTAGACCAGG	41.303	33.414	20.502	8.804	2.096	14.252	0	36.704	26.66
15	p.E260K	c.778G>A	chr1:41285088	ClinVar and HGMD	10	GGAGGCGAAGATGAGCACCA	39.493	38.289	44.355	34.724	26.748	32.001	8.942	52.931	57.097
15	p.E260K	c.778G>A	chr1:41285088	ClinVar and HGMD	11	TCCTGGTCTACCTGGCTAAG	36.681	34.384	11.214	4.08	0	12.264	0	41.408	26.862
15	p.E260K	c.778G>A	chr1:41285088	ClinVar and HGMD	12	CTTCTTAGCCAGGTAGACCA	34.918	29.459	26.26	2.461	0.772	13.274	0	33.048	47.279
15	p.E260K	c.778G>A	chr1:41285088	ClinVar and HGMD	13	GTCGGAGTTGGCGTCCTTCT	27.48	21.38	13.888	8.653	2.035	0.143	0	19.351	no_activity
15	p.E260K	c.778G>A	chr1:41285088	ClinVar and HGMD	14	GCCAGGTAGACCAGGAAGGA	27.04	22.628	7.384	20.091	0.062	5.589	0.832	34.448	43.464
15	p.E260K	c.778G>A	chr1:41285088	ClinVar and HGMD	15	GTCTACCTGGCTAAGAAGGA	26.918	16.533	33.74	7.978	0.561	0.569	0.171	30.245	29.628
15	p.E260K	c.778G>A	chr1:41285088	ClinVar and HGMD	16	CTGGTCTACCTGGCTAAGAA	25.421	25.263	33.819	0	0	0.798	0	44.159	44.784
15	p.E260K	c.778G>A	chr1:41285088	ClinVar and HGMD	17	TTAGCCAGGTAGACCAGGAA	25.269	17.749	14.238	1.099	0	0.58	0	38.228	46.141
15	p.E260K	c.778G>A	chr1:41285088	ClinVar and HGMD	18	GAGTTGGCGTCCTTCTTAGC	22.461	21.561	10.405	19.43	15.55	8.978	10.496	33.968	6.818
15	p.E260K	c.778G>A	chr1:41285088	ClinVar and HGMD	19	CAGGTAGACCAGGAAGGAGG	21.239	20.547	19.596	11.536	4	12.912	1.208	30.865	34.491
15	p.E260K	c.778G>A	chr1:41285088	ClinVar and HGMD	20	CCTTCCTGGTCTACCTGGCT	21.061	24.57	0	0.076	0.314	0	0	6.855	7.683
15	p.E260K	c.778G>A	chr1:41285088	ClinVar and HGMD	21	TGGCGTCCTTCTTAGCCAGG	20.475	10.681	no_activity	0	0	0	0	20.423	4.603
15	p.E260K	c.778G>A	chr1:41285088	ClinVar and HGMD	22	GCTAAGAAGGACGCCAACTC	20.307	23.178	30.735	18.574	6.722	7.55	2.059	31.714	28.637
15	p.E260K	c.778G>A	chr1:41285088	ClinVar and HGMD	23	TCGGAGTTGGCGTCCTTCTT	no_activity	no_activity	17.233	no_activity	no_activity	no_activity	no_activity	7.035	14.676
15	p.E260K	c.778G>A	chr1:41285088	ClinVar and HGMD	24	GGCGTCCTTCTTAGCCAGGT	17.851	18.95	23.832	3.059	0	1.263	0.885	37.441	41.112
15	p.E260K	c.778G>A	chr1:41285088	ClinVar and HGMD	25	CTTCCTGGTCTACCTGGCTA	15.266	16.757	11.594	0.439	0	0.625	0	26.706	37.787
15	p.E260K	c.778G>A	chr1:41285088	ClinVar and HGMD	26	TCCTTCTTAGCCAGGTAGAC	13.536	8.211	0.746	0	0	0	0	19.69	10.719
15	p.E260K	c.778G>A	chr1:41285088	ClinVar and HGMD	27	GCCTCCTTCCTGGTCTACCT	13.22	10.046	13.342	8.276	3.877	5.936	0.457	20.27	18.476
15	p.E260K	c.778G>A	chr1:41285088	ClinVar and HGMD	28	GGGTTCCTGGTGCTCATCTT	11.214	13.656	26.654	1.847	0	0.007	0	25.748	12.458
15	p.E260K	c.778G>A	chr1:41285088	ClinVar and HGMD	29	GAGGCGAAGATGAGCACCAG	no_activity	no_activity	24.703	no_activity	no_activity	no_activity	no_activity	32.804	no_activity
15	p.E260K	c.778G>A	chr1:41285088	ClinVar and HGMD	30	TTCTTAGCCAGGTAGACCAG	no_activity	no_activity	no_activity	no_activity	no_activity	no_activity	no_activity	30.13	42.965
15	p.E260K	c.778G>A	chr1:41285088	ClinVar and HGMD	31	GTTGGCGTCCTTCTTAGCCA	no_activity	no_activity	10.283	no_activity	no_activity	no_activity	no_activity	32.759	no_activity
15	p.E260K	c.778G>A	chr1:41285088	ClinVar and HGMD	32	GCGTCCTTCTTAGCCAGGTA	no_activity	no_activity	13.51	no_activity	no_activity	no_activity	no_activity	7.059	no_activity
15	p.E260K	c.778G>A	chr1:41285088	ClinVar and HGMD	33	TGGTCTACCTGGCTAAGAAG	no_activity	no_activity	no_activity	no_activity	no_activity	no_activity	no_activity	36.981	18.282
15	p.E260K	c.778G>A	chr1:41285088	ClinVar and HGMD	34	TTCCTGGTCTACCTGGCTAA	no_activity	no_activity	no_activity	no_activity	no_activity	no_activity	no_activity	26.995	36.299
15	p.E260K	c.778G>A	chr1:41285088	ClinVar and HGMD	35	TACCTGGCTAAGAAGGACGC	no_activity	no_activity	4.472	no_activity	no_activity	no_activity	no_activity	8.652	no_activity
15	p.E260K	c.778G>A	chr1:41285088	ClinVar and HGMD	36	GGAGTTGGCGTCCTTCTTAG	no_activity	no_activity	no_activity	no_activity	no_activity	no_activity	no_activity	no_activity	16.77
15	p.E260K	c.778G>A	chr1:41285088	ClinVar and HGMD	37	TTGGCGTCCTTCTTAGCCAG	no_activity	no_activity	no_activity	no_activity	no_activity	no_activity	no_activity	27.546	18.639
15	p.E260K	c.778G>A	chr1:41285088	ClinVar and HGMD	38	ACCTGGCTAAGAAGGACGCC	no_activity	no_activity	no_activity	no_activity	no_activity	no_activity	no_activity	8.11	no_activity
15	p.E260K	c.778G>A	chr1:41285088	ClinVar and HGMD	39	TCCTTCCTGGTCTACCTGGC	no_activity	no_activity	no_activity	no_activity	no_activity	no_activity	no_activity	10.617	20.675
15	p.E260K	c.778G>A	chr1:41285088	ClinVar and HGMD	40	GTCCTTCTTAGCCAGGTAGA	no_activity	no_activity	no_activity	no_activity	no_activity	no_activity	no_activity	no_activity	11.483
15	p.E260K	c.778G>A	chr1:41285088	ClinVar and HGMD	41	CTAAGAAGGACGCCAACTCC	no_activity	no_activity	no_activity	no_activity	no_activity	no_activity	no_activity	15.576	no_activity
16	p.D262V	c.785A>T	chr1:41285095	ClinVar and HGMD	1	AGTTGGCGACCTTCTCAGCC	52.769	43.184	28.548	46.189	40.821	47.562	34.428	37.26	23.229
16	p.D262V	c.785A>T	chr1:41285095	ClinVar and HGMD	2	GTAGGAGGAGAAGTCGGAGT	52.691	50.751	39.539	47.652	51.873	48.915	37.054	31.181	22.821
16	p.D262V	c.785A>T	chr1:41285095	ClinVar and HGMD	3	GCTCATCTTCGCCTCCTTCC	52.523	49.648	35.166	44.845	39.991	41.507	11.538	43.17	24.901
16	p.D262V	c.785A>T	chr1:41285095	ClinVar and HGMD	4	CCTTCTCAGCCAGGTAGACC	52.342	49.564	22.587	30.272	30.09	45.311	0.708	27.746	17.029
16	p.D262V	c.785A>T	chr1:41285095	ClinVar and HGMD	5	CCTGGTCTACCTGGCTGAGA	48.497	45.425	33.364	32.05	22.454	41.831	0.327	35.54	17.487
16	p.D262V	c.785A>T	chr1:41285095	ClinVar and HGMD	6	TCTCAGCCAGGTAGACCAGG	42.513	35.02	22.492	14.697	2.228	17.211	0	36.252	25.521
16	p.D262V	c.785A>T	chr1:41285095	ClinVar and HGMD	7	CTTCTCAGCCAGGTAGACCA	39.515	32.622	28.711	4.458	3.492	16.93	0.391	35.114	49.733
16	p.D262V	c.785A>T	chr1:41285095	ClinVar and HGMD	8	AAGGAGGCGAAGATGAGCAC	36.438	35.79	13.962	32.231	19.747	17.737	18.347	33.877	16.715
16	p.D262V	c.785A>T	chr1:41285095	ClinVar and HGMD	9	TCCTGGTCTACCTGGCTGAG	36.3	28.541	13	2.851	0	9.914	0	38.321	27.413
16	p.D262V	c.785A>T	chr1:41285095	ClinVar and HGMD	10	ACCAGGAAGGAGGCGAAGAT	34.411	42.26	37.588	17.679	5.607	5.044	0	39.402	28.04
16	p.D262V	c.785A>T	chr1:41285095	ClinVar and HGMD	11	GTCGGAGTTGGCGACCTTCT	28.9	26.135	19.076	9.62	3.64	1.702	0.304	24.533	no_activity
16	p.D262V	c.785A>T	chr1:41285095	ClinVar and HGMD	12	TGGCGACCTTCTCAGCCAGG	27.871	19.91	no_activity	2.69	0.068	1.259	0	26.757	7.809
16	p.D262V	c.785A>T	chr1:41285095	ClinVar and HGMD	13	TAGGAGGAGAAGTCGGAGTT	25.918	24.151	6.596	1.79	0	4.494	0	37.78	44.283
16	p.D262V	c.785A>T	chr1:41285095	ClinVar and HGMD	14	GACCAGGAAGGAGGCGAAGA	25.623	22.172	21.349	15.743	0.008	3.475	5.512	41.503	47.589
16	p.D262V	c.785A>T	chr1:41285095	ClinVar and HGMD	15	GGAGGAGAAGTCGGAGTTGG	24.077	18.831	32.815	16.197	0	5.465	1.281	36.501	38.738
16	p.D262V	c.785A>T	chr1:41285095	ClinVar and HGMD	16	TGCTCATCTTCGCCTCCTTC	22.13	9.29	no_activity	0	0	0	0	17.811	no_activity
16	p.D262V	c.785A>T	chr1:41285095	ClinVar and HGMD	17	GAGTTGGCGACCTTCTCAGC	22.08	19.097	6.325	18.06	13.003	13.775	19.735	28.638	1.167
16	p.D262V	c.785A>T	chr1:41285095	ClinVar and HGMD	18	ACCTTCTCAGCCAGGTAGAC	19.722	22.27	4.677	6.529	0.036	2.281	0	22.505	11.38
16	p.D262V	c.785A>T	chr1:41285095	ClinVar and HGMD	19	GCTGAGAAGGTCGCCAACTC	19.48	23.744	33.109	17.271	6.312	9.027	1.872	27.968	30.948
16	p.D262V	c.785A>T	chr1:41285095	ClinVar and HGMD	20	GGCGACCTTCTCAGCCAGGT	19.075	18.846	26.508	2.21	0	0	1.253	36.679	42.002
16	p.D262V	c.785A>T	chr1:41285095	ClinVar and HGMD	21	GTAGACCAGGAAGGAGGCGA	17.143	15.048	17.959	17.049	5.65	5.179	1.712	33.112	34.821
16	p.D262V	c.785A>T	chr1:41285095	ClinVar and HGMD	22	GTCTACCTGGCTGAGAAGGT	17.06	16.533	28.511	7.189	0.818	1.566	0.383	17.451	20.504
16	p.D262V	c.785A>T	chr1:41285095	ClinVar and HGMD	23	TCGGAGTTGGCGACCTTCTC	no_activity	no_activity	8.722	no_activity	no_activity	no_activity	no_activity	6.32	7.171
16	p.D262V	c.785A>T	chr1:41285095	ClinVar and HGMD	24	CTGGTCTACCTGGCTGAGAA	no_activity	no_activity	24.361	no_activity	no_activity	no_activity	no_activity	45.061	no_activity
16	p.D262V	c.785A>T	chr1:41285095	ClinVar and HGMD	25	GTTGGCGACCTTCTCAGCCA	no_activity	no_activity	12.76	no_activity	no_activity	no_activity	no_activity	34.5	no_activity
16	p.D262V	c.785A>T	chr1:41285095	ClinVar and HGMD	26	AGACCAGGAAGGAGGCGAAG	no_activity	no_activity	no_activity	no_activity	no_activity	no_activity	no_activity	18.282	16.288
16	p.D262V	c.785A>T	chr1:41285095	ClinVar and HGMD	27	CCAGGAAGGAGGCGAAGATG	no_activity	no_activity	14.52	no_activity	no_activity	no_activity	no_activity	33.522	23.007
16	p.D262V	c.785A>T	chr1:41285095	ClinVar and HGMD	28	CTCATCTTCGCCTCCTTCCT	no_activity	no_activity	24.454	no_activity	no_activity	no_activity	no_activity	25.588	no_activity
16	p.D262V	c.785A>T	chr1:41285095	ClinVar and HGMD	29	GCGACCTTCTCAGCCAGGTA	no_activity	no_activity	13.676	no_activity	no_activity	no_activity	no_activity	7.701	no_activity
16	p.D262V	c.785A>T	chr1:41285095	ClinVar and HGMD	30	AGGAAGGAGGCGAAGATGAG	no_activity	no_activity	no_activity	no_activity	no_activity	no_activity	no_activity	15.266	no_activity
16	p.D262V	c.785A>T	chr1:41285095	ClinVar and HGMD	31	TTCTCAGCCAGGTAGACCAG	no_activity	no_activity	no_activity	no_activity	no_activity	no_activity	no_activity	29.023	42.753
16	p.D262V	c.785A>T	chr1:41285095	ClinVar and HGMD	32	TGGTCTACCTGGCTGAGAAG	no_activity	no_activity	no_activity	no_activity	no_activity	no_activity	no_activity	26.045	no_activity
16	p.D262V	c.785A>T	chr1:41285095	ClinVar and HGMD	33	TAGACCAGGAAGGAGGCGAA	no_activity	no_activity	no_activity	no_activity	no_activity	no_activity	no_activity	40.386	6.091
16	p.D262V	c.785A>T	chr1:41285095	ClinVar and HGMD	34	GGAGTTGGCGACCTTCTCAG	no_activity	no_activity	no_activity	no_activity	no_activity	no_activity	no_activity	no_activity	24.255
16	p.D262V	c.785A>T	chr1:41285095	ClinVar and HGMD	35	TTCCTGGTCTACCTGGCTGA	no_activity	no_activity	no_activity	no_activity	no_activity	no_activity	no_activity	27.073	36.528
16	p.D262V	c.785A>T	chr1:41285095	ClinVar and HGMD	36	CCAACTCCGACTTCTCCTCC	no_activity	no_activity	no_activity	no_activity	no_activity	no_activity	no_activity	23.135	no_activity
16	p.D262V	c.785A>T	chr1:41285095	ClinVar and HGMD	37	GAAGGAGGCGAAGATGAGCA	no_activity	no_activity	no_activity	no_activity	no_activity	no_activity	no_activity	no_activity	13.538
16	p.D262V	c.785A>T	chr1:41285095	ClinVar and HGMD	38	GAGGAGAAGTCGGAGTTGGC	no_activity	no_activity	5.293	no_activity	no_activity	no_activity	no_activity	11.801	no_activity
16	p.D262V	c.785A>T	chr1:41285095	ClinVar and HGMD	39	TACCTGGCTGAGAAGGTCGC	no_activity	no_activity	4.765	no_activity	no_activity	no_activity	no_activity	8.74	no_activity
16	p.D262V	c.785A>T	chr1:41285095	ClinVar and HGMD	40	TTGGCGACCTTCTCAGCCAG	no_activity	no_activity	no_activity	no_activity	no_activity	no_activity	no_activity	28.121	23.097
16	p.D262V	c.785A>T	chr1:41285095	ClinVar and HGMD	41	ACCTGGCTGAGAAGGTCGCC	no_activity	no_activity	no_activity	no_activity	no_activity	no_activity	no_activity	5.746	no_activity
16	p.D262V	c.785A>T	chr1:41285095	ClinVar and HGMD	42	GACCTTCTCAGCCAGGTAGA	no_activity	no_activity	no_activity	no_activity	no_activity	no_activity	no_activity	no_activity	12.542
16	p.D262V	c.785A>T	chr1:41285095	ClinVar and HGMD	43	CTGAGAAGGTCGCCAACTCC	no_activity	no_activity	no_activity	no_activity	no_activity	no_activity	no_activity	12.369	no_activity
17	p.D266Y	c.796G>T	chr1:41285106	ClinVar and HGMD	1	CTACGCCGACTCGCTCTGGT	58.383	50.957	33.322	8.402	0	22.445	0	45.289	31.587
17	p.D266Y	c.796G>T	chr1:41285106	ClinVar and HGMD	2	CTCAGCCAGGTAGACCAGGA	56.506	48.963	23.567	0	0	10.064	0	31.68	33.999
17	p.D266Y	c.796G>T	chr1:41285106	ClinVar and HGMD	3	CGCCTCCTTCCTGGTCTACC	56.247	54.134	35.516	12.98	3.311	16.876	0	32.698	25.196
17	p.D266Y	c.796G>T	chr1:41285106	ClinVar and HGMD	4	GTAGGAGGAGAAGTAGGAGT	55.831	53.076	42.808	54.676	60.01	53.983	42.293	33.441	26.705
17	p.D266Y	c.796G>T	chr1:41285106	ClinVar and HGMD	5	AGTTGGCGTCCTTCTCAGCC	51.808	43.748	27.563	45.065	40.272	45.696	33.723	36.564	26.435
17	p.D266Y	c.796G>T	chr1:41285106	ClinVar and HGMD	6	CCTCCTACGCCGACTCGCTC	51.429	48.966	26.142	16.069	6.536	31.129	0	29.896	12.813
17	p.D266Y	c.796G>T	chr1:41285106	ClinVar and HGMD	7	CCACCAGAGCGAGTCGGCGT	51.174	49.659	25.839	39.526	38.66	41.924	6.773	26.872	21.512
17	p.D266Y	c.796G>T	chr1:41285106	ClinVar and HGMD	8	GTCGGCGTAGGAGGAGAAGT	49.949	49.378	35.945	47.831	42.665	42.244	36.018	34.916	31.783
17	p.D266Y	c.796G>T	chr1:41285106	ClinVar and HGMD	9	AGCCAGGTAGACCAGGAAGG	49.923	49.49	41.507	49.707	39.496	51.299	27.051	28.437	25.426
17	p.D266Y	c.796G>T	chr1:41285106	ClinVar and HGMD	10	CCAGAGCGAGTCGGCGTAGG	49.079	51.136	32.919	37.22	1.809	36.489	0.297	41.34	38.659
17	p.D266Y	c.796G>T	chr1:41285106	ClinVar and HGMD	11	CAGCCAGGTAGACCAGGAAG	43.401	39.879	31.427	22.475	3.436	19.697	0	39.266	31.206
17	p.D266Y	c.796G>T	chr1:41285106	ClinVar and HGMD	12	CCTACGCCGACTCGCTCTGG	43.184	43.944	16.834	36.762	22.189	35.852	1.852	31.259	23.89
17	p.D266Y	c.796G>T	chr1:41285106	ClinVar and HGMD	13	ACCAGAGCGAGTCGGCGTAG	35.644	35.363	14.442	25.733	16.927	13.707	0	33.707	14.88
17	p.D266Y	c.796G>T	chr1:41285106	ClinVar and HGMD	14	TCGGCGTAGGAGGAGAAGTA	35.018	30.05	32.192	15.63	8.46	19.253	0.257	48.979	59.663
17	p.D266Y	c.796G>T	chr1:41285106	ClinVar and HGMD	15	TCCTACGCCGACTCGCTCTG	34.665	21.744	no_activity	0	0	0.197	0	17.528	no_activity
17	p.D266Y	c.796G>T	chr1:41285106	ClinVar and HGMD	16	AGAGCGAGTCGGCGTAGGAG	33.404	38.311	19.077	34.585	35.26	35.043	1.134	23.726	20.495
17	p.D266Y	c.796G>T	chr1:41285106	ClinVar and HGMD	17	GTAGGAGTTGGCGTCCTTCT	31.331	28.493	22.833	22.408	13.26	5.374	0.626	27.026	no_activity
17	p.D266Y	c.796G>T	chr1:41285106	ClinVar and HGMD	18	GCCAGGTAGACCAGGAAGGA	28.727	22.445	8.491	21.38	0.192	5.642	0.624	36.358	43.983
17	p.D266Y	c.796G>T	chr1:41285106	ClinVar and HGMD	19	CAGAGCGAGTCGGCGTAGGA	28.193	15.052	0.972	0	0	0	0.155	37.979	49.218
17	p.D266Y	c.796G>T	chr1:41285106	ClinVar and HGMD	20	TAGGAGGAGAAGTAGGAGTT	27.353	22.584	19.136	10.822	1.958	5.992	0	38.304	40.433
17	p.D266Y	c.796G>T	chr1:41285106	ClinVar and HGMD	21	AGTCGGCGTAGGAGGAGAAG	27.087	27.29	16.137	27.973	14.295	15.917	6.171	28.899	16.052
17	p.D266Y	c.796G>T	chr1:41285106	ClinVar and HGMD	22	CGGCGTAGGAGGAGAAGTAG	26.812	23.763	23.302	3.647	0	0.29	0	29.828	19.459
17	p.D266Y	c.796G>T	chr1:41285106	ClinVar and HGMD	23	GCGAGTCGGCGTAGGAGGAG	26.595	24.675	6.985	10.847	0.777	0.309	0	18.61	no_activity
17	p.D266Y	c.796G>T	chr1:41285106	ClinVar and HGMD	24	CCTTCCTGGTCTACCTGGCT	25.972	28.291	1.048	0.953	0.873	0.995	0	12.964	13.33
17	p.D266Y	c.796G>T	chr1:41285106	ClinVar and HGMD	25	CACCAGAGCGAGTCGGCGTA	25.3	20.266	4.66	1.268	0	0.94	0.601	34.149	44.103
17	p.D266Y	c.796G>T	chr1:41285106	ClinVar and HGMD	26	TCAGCCAGGTAGACCAGGAA	25.136	20.507	13.428	0.392	0	2.176	0	39.303	45.657
17	p.D266Y	c.796G>T	chr1:41285106	ClinVar and HGMD	27	GGTAGACCAGGAAGGAGGCG	23.092	22.131	2.2	22.634	3.084	5.925	0	20.745	14.032
17	p.D266Y	c.796G>T	chr1:41285106	ClinVar and HGMD	28	GAGTTGGCGTCCTTCTCAGC	22.641	19.337	6.254	17.119	12.946	9.641	13.067	28.874	3.893
17	p.D266Y	c.796G>T	chr1:41285106	ClinVar and HGMD	29	CAGGTAGACCAGGAAGGAGG	21.49	20.647	19.575	11.15	3.934	13.21	1.431	30.563	34.515
17	p.D266Y	c.796G>T	chr1:41285106	ClinVar and HGMD	30	TAGGAGTTGGCGTCCTTCTC	no_activity	no_activity	20.477	no_activity	no_activity	no_activity	no_activity	14.502	13.465
17	p.D266Y	c.796G>T	chr1:41285106	ClinVar and HGMD	31	CGTAGGAGGAGAAGTAGGAG	17.872	17.125	no_activity	1.817	0	0	0	15.996	no_activity
17	p.D266Y	c.796G>T	chr1:41285106	ClinVar and HGMD	32	TCCTCCTACGCCGACTCGCT	16.958	11.275	no_activity	0	0.275	0	0	6.047	no_activity
17	p.D266Y	c.796G>T	chr1:41285106	ClinVar and HGMD	33	CTTCCTGGTCTACCTGGCTG	16.918	16.67	12.762	0.293	0	0.691	0	25.049	35.981
17	p.D266Y	c.796G>T	chr1:41285106	ClinVar and HGMD	34	TCGCCTCCTTCCTGGTCTAC	16.632	5.851	no_activity	0	0.078	0	0	16.939	no_activity
17	p.D266Y	c.796G>T	chr1:41285106	ClinVar and HGMD	35	AACTCCTACTTCTCCTCCTA	14.778	16.886	25.271	2.799	0.691	1.365	0.956	19.076	12.09
17	p.D266Y	c.796G>T	chr1:41285106	ClinVar and HGMD	36	TCCTTCCTGGTCTACCTGGC	13.579	7.046	0	0.659	0	1.783	0.255	30.606	43.565
17	p.D266Y	c.796G>T	chr1:41285106	ClinVar and HGMD	37	AGGAGGAGAAGTAGGAGTTG	no_activity	no_activity	no_activity	no_activity	no_activity	no_activity	no_activity	25.451	no_activity
17	p.D266Y	c.796G>T	chr1:41285106	ClinVar and HGMD	38	TCCTACTTCTCCTCCTACGC	11.517	9.281	17.871	2.281	0.902	0.174	0.475	24.996	17.121
17	p.D266Y	c.796G>T	chr1:41285106	ClinVar and HGMD	39	GGAGGAGAAGTAGGAGTTGG	no_activity	no_activity	36.531	no_activity	no_activity	no_activity	no_activity	39.752	no_activity
17	p.D266Y	c.796G>T	chr1:41285106	ClinVar and HGMD	40	GTTGGCGTCCTTCTCAGCCA	no_activity	no_activity	12.686	no_activity	no_activity	no_activity	no_activity	33.61	no_activity
17	p.D266Y	c.796G>T	chr1:41285106	ClinVar and HGMD	41	GCCTCCTTCCTGGTCTACCT	9.531	7.878	12.444	5.929	2.117	3.958	0.355	20.832	17.805
17	p.D266Y	c.796G>T	chr1:41285106	ClinVar and HGMD	42	AGCGAGTCGGCGTAGGAGGA	no_activity	no_activity	no_activity	no_activity	no_activity	no_activity	no_activity	37.569	45.092
17	p.D266Y	c.796G>T	chr1:41285106	ClinVar and HGMD	43	CTCCTTCCTGGTCTACCTGG	no_activity	no_activity	no_activity	no_activity	no_activity	no_activity	no_activity	8.208	no_activity
17	p.D266Y	c.796G>T	chr1:41285106	ClinVar and HGMD	44	GGCGTAGGAGGAGAAGTAGG	no_activity	no_activity	29.982	no_activity	no_activity	no_activity	no_activity	44.352	28.59
17	p.D266Y	c.796G>T	chr1:41285106	ClinVar and HGMD	45	CTCCTACGCCGACTCGCTCT	no_activity	no_activity	3.055	no_activity	no_activity	no_activity	no_activity	37.668	15.097
17	p.D266Y	c.796G>T	chr1:41285106	ClinVar and HGMD	46	CTTCTCCTCCTACGCCGACT	no_activity	no_activity	4.639	no_activity	no_activity	no_activity	no_activity	19.792	15.379
17	p.D266Y	c.796G>T	chr1:41285106	ClinVar and HGMD	47	AGGTAGACCAGGAAGGAGGC	no_activity	no_activity	no_activity	no_activity	no_activity	no_activity	no_activity	31.376	36.583
17	p.D266Y	c.796G>T	chr1:41285106	ClinVar and HGMD	48	GAGTCGGCGTAGGAGGAGAA	no_activity	no_activity	no_activity	no_activity	no_activity	no_activity	no_activity	32.184	26.045
17	p.D266Y	c.796G>T	chr1:41285106	ClinVar and HGMD	49	GGAGTTGGCGTCCTTCTCAG	no_activity	no_activity	no_activity	no_activity	no_activity	no_activity	no_activity	no_activity	26.814
17	p.D266Y	c.796G>T	chr1:41285106	ClinVar and HGMD	50	GCGTAGGAGGAGAAGTAGGA	no_activity	no_activity	no_activity	no_activity	no_activity	no_activity	no_activity	37.518	no_activity
17	p.D266Y	c.796G>T	chr1:41285106	ClinVar and HGMD	51	CGAGTCGGCGTAGGAGGAGA	no_activity	no_activity	10.065	no_activity	no_activity	no_activity	no_activity	30.921	no_activity
17	p.D266Y	c.796G>T	chr1:41285106	ClinVar and HGMD	52	CCAACTCCTACTTCTCCTCC	no_activity	no_activity	no_activity	no_activity	no_activity	no_activity	no_activity	22.056	no_activity
17	p.D266Y	c.796G>T	chr1:41285106	ClinVar and HGMD	53	CCTCCTTCCTGGTCTACCTG	no_activity	no_activity	no_activity	no_activity	no_activity	no_activity	no_activity	9.056	no_activity
17	p.D266Y	c.796G>T	chr1:41285106	ClinVar and HGMD	54	TACTTCTCCTCCTACGCCGA	no_activity	no_activity	no_activity	no_activity	no_activity	no_activity	no_activity	6.65	no_activity
17	p.D266Y	c.796G>T	chr1:41285106	ClinVar and HGMD	55	CCTACTTCTCCTCCTACGCC	no_activity	no_activity	no_activity	no_activity	no_activity	no_activity	no_activity	10.878	no_activity
17	p.D266Y	c.796G>T	chr1:41285106	ClinVar and HGMD	56	CTGAGAAGGACGCCAACTCC	no_activity	no_activity	no_activity	no_activity	no_activity	no_activity	no_activity	4.447	no_activity
18	p.S269del	c.806_808del	chr1:41285111-41285113	ClinVar and HGMD	1	CTACGCCGACTCGCTCTGGT	59.04	51.18	35.082	9.429	0	23.101	0	45.383	32.522
18	p.S269del	c.806_808del	chr1:41285111-41285113	ClinVar and HGMD	2	ACGCCGACTCGCTCTGGTGG	56.829	50.82	30.885	48.916	45.726	45.789	23.097	39.256	22.833
18	p.S269del	c.806_808del	chr1:41285111-41285113	ClinVar and HGMD	3	CGAGTCGGCGTAGGAGAAGT	55.758	51.623	33.877	42.151	20.096	42.794	0.58	30.066	29.597
18	p.S269del	c.806_808del	chr1:41285111-41285113	ClinVar and HGMD	4	GGCGTAGGAGAAGTCGGAGT	52.289	49.267	37.485	45.199	45.862	45.587	35.994	32.025	20.643
18	p.S269del	c.806_808del	chr1:41285111-41285113	ClinVar and HGMD	5	TCTCCTACGCCGACTCGCTC	51.898	48.945	26.915	9.078	12.281	28.224	0.405	30.805	12.341
18	p.S269del	c.806_808del	chr1:41285111-41285113	ClinVar and HGMD	6	TACGCCGACTCGCTCTGGTG	50.684	48.09	25.639	40.292	38.117	47.352	3.575	37.641	32.368
18	p.S269del	c.806_808del	chr1:41285111-41285113	ClinVar and HGMD	7	CCACCAGAGCGAGTCGGCGT	49.444	48.526	24.344	38.986	34.904	39.988	4.531	28.283	22.192
18	p.S269del	c.806_808del	chr1:41285111-41285113	ClinVar and HGMD	8	CCTGGTCTACCTGGCTGAGA	48.51	44.998	29.369	27.754	20.096	40.641	0.195	36.922	17.449
18	p.S269del	c.806_808del	chr1:41285111-41285113	ClinVar and HGMD	9	CCTACGCCGACTCGCTCTGG	42.686	43.665	16.368	35.463	22.756	35.6	1.641	29.908	23.947
18	p.S269del	c.806_808del	chr1:41285111-41285113	ClinVar and HGMD	10	TCTCAGCCAGGTAGACCAGG	41.732	34.936	21.737	14.783	2.688	17.955	0	35.812	26.431
18	p.S269del	c.806_808del	chr1:41285111-41285113	ClinVar and HGMD	11	TCCTGGTCTACCTGGCTGAG	37.914	30.566	11.662	2.784	0	12.403	0	38.924	31.59
18	p.S269del	c.806_808del	chr1:41285111-41285113	ClinVar and HGMD	12	CTTCTCAGCCAGGTAGACCA	37.832	31.213	28.466	4.198	2.711	17.324	0.324	34.844	49.148
18	p.S269del	c.806_808del	chr1:41285111-41285113	ClinVar and HGMD	13	TCCTACGCCGACTCGCTCTG	33.606	21.536	no_activity	0	0	0.068	0	16.503	no_activity
18	p.S269del	c.806_808del	chr1:41285111-41285113	ClinVar and HGMD	14	ACCAGAGCGAGTCGGCGTAG	32.041	34.057	13.203	21.484	18.56	11.11	0	23.606	8.481
18	p.S269del	c.806_808del	chr1:41285111-41285113	ClinVar and HGMD	15	AGTCGGCGTAGGAGAAGTCG	31.726	30.458	25.566	34.009	29.856	27.729	9.203	35.221	14.355
18	p.S269del	c.806_808del	chr1:41285111-41285113	ClinVar and HGMD	16	CGCCGACTCGCTCTGGTGGG	27.984	21.467	16.196	0	0	0.032	0	21.621	26.854
18	p.S269del	c.806_808del	chr1:41285111-41285113	ClinVar and HGMD	17	AGAGCGAGTCGGCGTAGGAG	27.828	29.916	18.034	29.725	27.989	31.342	0	24.474	no_activity
18	p.S269del	c.806_808del	chr1:41285111-41285113	ClinVar and HGMD	18	CACCAGAGCGAGTCGGCGTA	26.139	21.216	6.732	2.03	0	1.621	0.647	36.05	43.029
18	p.S269del	c.806_808del	chr1:41285111-41285113	ClinVar and HGMD	19	GAGTCGGCGTAGGAGAAGTC	23.551	25.795	15.758	16.065	15.24	7.166	4.816	42.776	49.753
18	p.S269del	c.806_808del	chr1:41285111-41285113	ClinVar and HGMD	20	GCGAGTCGGCGTAGGAGAAG	23.201	18.075	2.974	3.238	0	0	0	no_activity	no_activity
18	p.S269del	c.806_808del	chr1:41285111-41285113	ClinVar and HGMD	21	GCGTAGGAGAAGTCGGAGTT	23.085	20.624	10.963	11.518	1.638	4.148	0.472	38.664	44.413
18	p.S269del	c.806_808del	chr1:41285111-41285113	ClinVar and HGMD	22	CCAGAGCGAGTCGGCGTAGG	20.307	23.35	18.271	3.035	0	3.892	0	37.657	44.525
18	p.S269del	c.806_808del	chr1:41285111-41285113	ClinVar and HGMD	23	TTCTCCTACGCCGACTCGCT	20.146	9.351	no_activity	0	0	0	0	7.022	no_activity
18	p.S269del	c.806_808del	chr1:41285111-41285113	ClinVar and HGMD	24	CCCACCAGAGCGAGTCGGCG	15.788	11.579	0	1.103	0	0	0	12.075	5.582
18	p.S269del	c.806_808del	chr1:41285111-41285113	ClinVar and HGMD	25	CGGCGTAGGAGAAGTCGGAG	15.73	10.303	no_activity	0	0	0	0	12.675	no_activity
18	p.S269del	c.806_808del	chr1:41285111-41285113	ClinVar and HGMD	26	GCCAACTCCGACTTCTCCTA	12.967	17.887	20.562	4.83	0.159	0.184	1.802	22.451	13.812
18	p.S269del	c.806_808del	chr1:41285111-41285113	ClinVar and HGMD	27	CCGACTCGCTCTGGTGGGGG	11.322	6.641	3.429	0	0	0	0	5.421	no_activity
18	p.S269del	c.806_808del	chr1:41285111-41285113	ClinVar and HGMD	28	AACTCCGACTTCTCCTACGC	11.071	13.511	21.383	13.745	7.584	3.172	2.063	25.838	18.86
18	p.S269del	c.806_808del	chr1:41285111-41285113	ClinVar and HGMD	29	GTAGGAGAAGTCGGAGTTGG	no_activity	no_activity	34.768	no_activity	no_activity	no_activity	no_activity	40.654	no_activity
18	p.S269del	c.806_808del	chr1:41285111-41285113	ClinVar and HGMD	30	CGTAGGAGAAGTCGGAGTTG	no_activity	no_activity	no_activity	no_activity	no_activity	no_activity	no_activity	12.4	no_activity
18	p.S269del	c.806_808del	chr1:41285111-41285113	ClinVar and HGMD	31	TCCCCCACCAGAGCGAGTCG	no_activity	no_activity	no_activity	no_activity	no_activity	no_activity	no_activity	3.169	no_activity
18	p.S269del	c.806_808del	chr1:41285111-41285113	ClinVar and HGMD	32	GAGCGAGTCGGCGTAGGAGA	no_activity	no_activity	29.83	no_activity	no_activity	no_activity	no_activity	32.223	7.396
18	p.S269del	c.806_808del	chr1:41285111-41285113	ClinVar and HGMD	33	GTCCCCCACCAGAGCGAGTC	5.646	6.091	0	0.816	0.142	0	2.045	35.311	38.436
18	p.S269del	c.806_808del	chr1:41285111-41285113	ClinVar and HGMD	34	GTCGGCGTAGGAGAAGTCGG	no_activity	no_activity	23.892	no_activity	no_activity	no_activity	no_activity	39.881	23.591
18	p.S269del	c.806_808del	chr1:41285111-41285113	ClinVar and HGMD	35	CGACTTCTCCTACGCCGACT	no_activity	no_activity	2.975	no_activity	no_activity	no_activity	no_activity	21.026	15.992
18	p.S269del	c.806_808del	chr1:41285111-41285113	ClinVar and HGMD	36	TTCTCAGCCAGGTAGACCAG	no_activity	no_activity	no_activity	no_activity	no_activity	no_activity	no_activity	30.517	43.123
18	p.S269del	c.806_808del	chr1:41285111-41285113	ClinVar and HGMD	37	CTCCTACGCCGACTCGCTCT	no_activity	no_activity	3.434	no_activity	no_activity	no_activity	no_activity	36.305	15.646
18	p.S269del	c.806_808del	chr1:41285111-41285113	ClinVar and HGMD	38	CAGAGCGAGTCGGCGTAGGA	no_activity	no_activity	no_activity	no_activity	no_activity	no_activity	no_activity	34.127	37.309
18	p.S269del	c.806_808del	chr1:41285111-41285113	ClinVar and HGMD	39	GCCGACTCGCTCTGGTGGGG	no_activity	no_activity	no_activity	no_activity	no_activity	no_activity	no_activity	10.358	10.726
18	p.S269del	c.806_808del	chr1:41285111-41285113	ClinVar and HGMD	40	AGCGAGTCGGCGTAGGAGAA	no_activity	no_activity	no_activity	no_activity	no_activity	no_activity	no_activity	24.897	no_activity
18	p.S269del	c.806_808del	chr1:41285111-41285113	ClinVar and HGMD	41	TCGGCGTAGGAGAAGTCGGA	no_activity	no_activity	no_activity	no_activity	no_activity	no_activity	no_activity	27.914	no_activity
18	p.S269del	c.806_808del	chr1:41285111-41285113	ClinVar and HGMD	42	ACGCCAACTCCGACTTCTCC	no_activity	no_activity	no_activity	no_activity	no_activity	no_activity	no_activity	13.49	no_activity
18	p.S269del	c.806_808del	chr1:41285111-41285113	ClinVar and HGMD	43	CCCCCACCAGAGCGAGTCGG	no_activity	no_activity	6.392	no_activity	no_activity	no_activity	no_activity	27.729	no_activity
18	p.S269del	c.806_808del	chr1:41285111-41285113	ClinVar and HGMD	44	TTCCTGGTCTACCTGGCTGA	no_activity	no_activity	no_activity	no_activity	no_activity	no_activity	no_activity	26.673	36.877
18	p.S269del	c.806_808del	chr1:41285111-41285113	ClinVar and HGMD	45	TCCGACTTCTCCTACGCCGA	no_activity	no_activity	no_activity	no_activity	no_activity	no_activity	no_activity	9.376	no_activity
18	p.S269del	c.806_808del	chr1:41285111-41285113	ClinVar and HGMD	46	ACTCCGACTTCTCCTACGCC	no_activity	no_activity	no_activity	no_activity	no_activity	no_activity	no_activity	10.346	no_activity
18	p.S269del	c.806_808del	chr1:41285111-41285113	ClinVar and HGMD	47	CCCCACCAGAGCGAGTCGGC	no_activity	no_activity	no_activity	no_activity	no_activity	no_activity	no_activity	5.395	5.843
19	p.Y270H	c.808T>C	chr1:41285118	ClinVar and HGMD	1	ACGCCGACTCGCTCTGGTGG	56.356	50.785	34.343	48.589	43.498	44.256	20.619	39.052	21.77
19	p.Y270H	c.808T>C	chr1:41285118	ClinVar and HGMD	2	CCACGCCGACTCGCTCTGGT	54.178	50.219	26.57	13.309	0	24.949	0	42.434	24.169
19	p.Y270H	c.808T>C	chr1:41285118	ClinVar and HGMD	3	CGTCCCCCACCAGAGCGAGT	53.948	53.168	37.741	50.443	46.099	51.548	11.753	24.222	13.054
19	p.Y270H	c.808T>C	chr1:41285118	ClinVar and HGMD	4	CGACTCGCTCTGGTGGGGGA	53.567	52.318	36.873	1.832	0	5.676	0	35.175	20.084
19	p.Y270H	c.808T>C	chr1:41285118	ClinVar and HGMD	5	AGTTGGCGTCCTTCTCAGCC	52.74	43.807	27.611	45.9	40.813	46.349	33	36.483	24.085
19	p.Y270H	c.808T>C	chr1:41285118	ClinVar and HGMD	6	CCTCCCACGCCGACTCGCTC	52.064	49.282	27.197	25.371	15.87	37.553	0.309	30.052	12.972
19	p.Y270H	c.808T>C	chr1:41285118	ClinVar and HGMD	7	CCTTCTCAGCCAGGTAGACC	51.713	48.699	23.556	27.254	26.321	45.07	0.987	26.937	17.435
19	p.Y270H	c.808T>C	chr1:41285118	ClinVar and HGMD	8	TGGTGGGGGACGGTGCGTGA	51.209	47.759	35.704	35.27	19.964	47.313	3.124	38.06	26.162
19	p.Y270H	c.808T>C	chr1:41285118	ClinVar and HGMD	9	CCACCAGAGCGAGTCGGCGT	51.116	49.406	28.117	39.632	41.455	43.829	8.44	25.44	17.736
19	p.Y270H	c.808T>C	chr1:41285118	ClinVar and HGMD	10	GTGGGAGGAGAAGTCGGAGT	50.834	49.48	38.927	45.119	47.052	44.238	29.487	29.607	21.051
19	p.Y270H	c.808T>C	chr1:41285118	ClinVar and HGMD	11	CACGCCGACTCGCTCTGGTG	50.42	48.209	27.057	42.508	26.891	47.634	3.268	36.35	32.356
19	p.Y270H	c.808T>C	chr1:41285118	ClinVar and HGMD	12	CCAGAGCGAGTCGGCGTGGG	48.635	48.74	31.016	15.79	0	20.737	0	38.823	38.488
19	p.Y270H	c.808T>C	chr1:41285118	ClinVar and HGMD	13	CCCACCAGAGCGAGTCGGCG	44.277	34.06	11.139	3.972	0	8.147	0	30.411	24.513
19	p.Y270H	c.808T>C	chr1:41285118	ClinVar and HGMD	14	CTGGTGGGGGACGGTGCGTG	44.263	41.573	15.542	35.233	1.968	30.335	0	37.674	29.154
19	p.Y270H	c.808T>C	chr1:41285118	ClinVar and HGMD	15	GTCGGCGTGGGAGGAGAAGT	43.41	43.715	27.11	41.56	37.816	29.362	30.6	27.176	19.932
19	p.Y270H	c.808T>C	chr1:41285118	ClinVar and HGMD	16	CCCACGCCGACTCGCTCTGG	42.55	43.536	15.432	34.478	14.618	34.83	0.55	30.408	23.798
19	p.Y270H	c.808T>C	chr1:41285118	ClinVar and HGMD	17	TCACGCACCGTCCCCCACCA	36.979	38.052	33.16	2.593	0.399	6.61	0	20.103	28.718
19	p.Y270H	c.808T>C	chr1:41285118	ClinVar and HGMD	18	CTCACGCACCGTCCCCCACC	33.95	28.607	28.108	8.332	2.178	5.071	0.426	43.942	53.281
19	p.Y270H	c.808T>C	chr1:41285118	ClinVar and HGMD	19	CCTCACGCACCGTCCCCCAC	33.865	28.591	10.988	8.514	0	4.546	0	25.753	no_activity
19	p.Y270H	c.808T>C	chr1:41285118	ClinVar and HGMD	20	TCCCACGCCGACTCGCTCTG	33.378	22.973	no_activity	0	0	0	0	14.628	no_activity
19	p.Y270H	c.808T>C	chr1:41285118	ClinVar and HGMD	21	ACCAGAGCGAGTCGGCGTGG	32.459	33.605	14.372	26.143	20.217	15.907	0	30.287	14.342
19	p.Y270H	c.808T>C	chr1:41285118	ClinVar and HGMD	22	AGAGCGAGTCGGCGTGGGAG	29.576	31.95	15.921	28.902	28.064	26.647	0	23.998	21.598
19	p.Y270H	c.808T>C	chr1:41285118	ClinVar and HGMD	23	GCACCGTCCCCCACCAGAGC	29.526	24.485	15.531	25.535	17.782	13.808	2.727	22.185	7.048
19	p.Y270H	c.808T>C	chr1:41285118	ClinVar and HGMD	24	CGCCGACTCGCTCTGGTGGG	28.076	21.84	15.604	0	0	0	0	22.028	28.039
19	p.Y270H	c.808T>C	chr1:41285118	ClinVar and HGMD	25	CGCACCGTCCCCCACCAGAG	26.286	22.083	18.834	7.833	4.192	13.618	1.903	40.343	52.956
19	p.Y270H	c.808T>C	chr1:41285118	ClinVar and HGMD	26	GTCTACCTGGCTGAGAAGGA	25.997	18.856	35.105	9.691	1.572	1.119	0.084	27.733	28.298
19	p.Y270H	c.808T>C	chr1:41285118	ClinVar and HGMD	27	TGGCGTCCTTCTCAGCCAGG	25.568	18.777	no_activity	0.906	0	0.236	0	24.684	5.508
19	p.Y270H	c.808T>C	chr1:41285118	ClinVar and HGMD	28	CACCAGAGCGAGTCGGCGTG	22.534	20.385	5.568	2.761	0	2.125	0.635	29.714	41.41
19	p.Y270H	c.808T>C	chr1:41285118	ClinVar and HGMD	29	GAGTTGGCGTCCTTCTCAGC	22.439	19.071	5.814	16.408	13.212	9.08	11.524	27.926	2.747
19	p.Y270H	c.808T>C	chr1:41285118	ClinVar and HGMD	30	CGGCGTGGGAGGAGAAGTCG	22.281	15.823	17.559	3.513	0	0.596	0	26.282	13.15
19	p.Y270H	c.808T>C	chr1:41285118	ClinVar and HGMD	31	CTGGTCTACCTGGCTGAGAA	21.756	20.622	25.05	0	0	0	0	41.153	42.335
19	p.Y270H	c.808T>C	chr1:41285118	ClinVar and HGMD	32	GCGAGTCGGCGTGGGAGGAG	20.755	15.584	8.192	7.536	1.086	0	0	20.398	no_activity
19	p.Y270H	c.808T>C	chr1:41285118	ClinVar and HGMD	33	AGTCGGCGTGGGAGGAGAAG	19.4	13.738	8.095	9.864	1.252	1.513	0	no_activity	no_activity
19	p.Y270H	c.808T>C	chr1:41285118	ClinVar and HGMD	34	CACGCACCGTCCCCCACCAG	no_activity	no_activity	12.237	no_activity	no_activity	no_activity	no_activity	32.214	39.895
19	p.Y270H	c.808T>C	chr1:41285118	ClinVar and HGMD	35	GCTGAGAAGGACGCCAACTC	18.917	25.237	32.864	18.923	13.829	13.395	2.982	28.92	29.595
19	p.Y270H	c.808T>C	chr1:41285118	ClinVar and HGMD	36	GGTGGGGGACGGTGCGTGAG	no_activity	no_activity	32.841	no_activity	no_activity	no_activity	no_activity	43.509	no_activity
19	p.Y270H	c.808T>C	chr1:41285118	ClinVar and HGMD	37	CAGAGCGAGTCGGCGTGGGA	18.432	10.57	0.354	0	0	0	0.141	29.519	42.785
19	p.Y270H	c.808T>C	chr1:41285118	ClinVar and HGMD	38	CGTGGGAGGAGAAGTCGGAG	18.228	17.537	no_activity	6.242	0	2.318	0	15.107	no_activity
19	p.Y270H	c.808T>C	chr1:41285118	ClinVar and HGMD	39	GGCGTCCTTCTCAGCCAGGT	18.11	19.162	25.283	3.425	0.006	1.312	1.183	35.268	40.819
19	p.Y270H	c.808T>C	chr1:41285118	ClinVar and HGMD	40	TGGGAGGAGAAGTCGGAGTT	18.102	17.91	6.197	0.783	0	0.552	0	35.948	41.823
19	p.Y270H	c.808T>C	chr1:41285118	ClinVar and HGMD	41	TCGGCGTGGGAGGAGAAGTC	17.174	13.676	4.116	7.064	1.965	8.621	0.04	42.757	45.93
19	p.Y270H	c.808T>C	chr1:41285118	ClinVar and HGMD	42	TCTGGTGGGGGACGGTGCGT	16.921	21.075	5.463	14.917	22.137	19.017	0	20.708	12.959
19	p.Y270H	c.808T>C	chr1:41285118	ClinVar and HGMD	43	AACTCCGACTTCTCCTCCCA	16.915	16.776	27.759	5.029	1.631	1.443	0.84	20.851	15.177
19	p.Y270H	c.808T>C	chr1:41285118	ClinVar and HGMD	44	GAGCGAGTCGGCGTGGGAGG	16.686	14.714	12.683	7.225	1.269	0.114	0.171	26.612	36.746
19	p.Y270H	c.808T>C	chr1:41285118	ClinVar and HGMD	45	TCCTCCCACGCCGACTCGCT	16.172	11.775	no_activity	0	0.264	0	0	6.753	no_activity
19	p.Y270H	c.808T>C	chr1:41285118	ClinVar and HGMD	46	TCCTTCTCAGCCAGGTAGAC	16.077	12.43	1.157	0	0	0	0	22.092	10.953
19	p.Y270H	c.808T>C	chr1:41285118	ClinVar and HGMD	47	CCCCACCAGAGCGAGTCGGC	15.755	11.988	no_activity	0.166	0.099	0	0	6.569	no_activity
19	p.Y270H	c.808T>C	chr1:41285118	ClinVar and HGMD	48	TCCGACTTCTCCTCCCACGC	13.309	14.835	20.066	1.804	0.7	1.506	0	25.318	23.461
19	p.Y270H	c.808T>C	chr1:41285118	ClinVar and HGMD	49	CCGTCCCCCACCAGAGCGAG	12.761	8.111	2.295	0	0	0	0	no_activity	no_activity
19	p.Y270H	c.808T>C	chr1:41285118	ClinVar and HGMD	50	CTCTGGTGGGGGACGGTGCG	12.512	12.623	0	0	0	0	0	32.842	45.088
19	p.Y270H	c.808T>C	chr1:41285118	ClinVar and HGMD	51	CCGACTCGCTCTGGTGGGGG	11.274	6.746	4.147	0	0	0	0	5.367	no_activity
19	p.Y270H	c.808T>C	chr1:41285118	ClinVar and HGMD	52	GTTGGCGTCCTTCTCAGCCA	no_activity	no_activity	12.607	no_activity	no_activity	no_activity	no_activity	32.491	no_activity
19	p.Y270H	c.808T>C	chr1:41285118	ClinVar and HGMD	53	GCTCTGGTGGGGGACGGTGC	9.517	8.528	no_activity	8.686	4.553	0.979	0	5.435	no_activity
19	p.Y270H	c.808T>C	chr1:41285118	ClinVar and HGMD	54	ACTCGCTCTGGTGGGGGACG	8.409	11.744	7.8	3.259	0.231	0	0	4.427	no_activity
19	p.Y270H	c.808T>C	chr1:41285118	ClinVar and HGMD	55	GGAGGAGAAGTCGGAGTTGG	no_activity	no_activity	32.633	no_activity	no_activity	no_activity	no_activity	39.4	no_activity
19	p.Y270H	c.808T>C	chr1:41285118	ClinVar and HGMD	56	GGGAGGAGAAGTCGGAGTTG	no_activity	no_activity	no_activity	no_activity	no_activity	no_activity	no_activity	15.423	no_activity
19	p.Y270H	c.808T>C	chr1:41285118	ClinVar and HGMD	57	GTCCCCCACCAGAGCGAGTC	7.159	7.031	0	1.038	0.234	0	1.398	34.603	36.777
19	p.Y270H	c.808T>C	chr1:41285118	ClinVar and HGMD	58	TCCCCCACCAGAGCGAGTCG	no_activity	no_activity	no_activity	no_activity	no_activity	no_activity	no_activity	2.006	no_activity
19	p.Y270H	c.808T>C	chr1:41285118	ClinVar and HGMD	59	GACTCGCTCTGGTGGGGGAC	no_activity	no_activity	9.423	no_activity	no_activity	no_activity	no_activity	32.175	24.077
19	p.Y270H	c.808T>C	chr1:41285118	ClinVar and HGMD	60	AGCGAGTCGGCGTGGGAGGA	no_activity	no_activity	no_activity	no_activity	no_activity	no_activity	no_activity	34.625	37.645
19	p.Y270H	c.808T>C	chr1:41285118	ClinVar and HGMD	61	GCGTCCTTCTCAGCCAGGTA	no_activity	no_activity	15.124	no_activity	no_activity	no_activity	no_activity	6.823	no_activity
19	p.Y270H	c.808T>C	chr1:41285118	ClinVar and HGMD	62	CCCTCACGCACCGTCCCCCA	no_activity	no_activity	no_activity	no_activity	no_activity	no_activity	no_activity	no_activity	20.891
19	p.Y270H	c.808T>C	chr1:41285118	ClinVar and HGMD	63	CTCCCACGCCGACTCGCTCT	no_activity	no_activity	2.772	no_activity	no_activity	no_activity	no_activity	38.01	13.756
19	p.Y270H	c.808T>C	chr1:41285118	ClinVar and HGMD	64	CTCGCTCTGGTGGGGGACGG	no_activity	no_activity	no_activity	no_activity	no_activity	no_activity	no_activity	24.345	32.412
19	p.Y270H	c.808T>C	chr1:41285118	ClinVar and HGMD	65	CTTCTCCTCCCACGCCGACT	no_activity	no_activity	4.846	no_activity	no_activity	no_activity	no_activity	19.301	14.837
19	p.Y270H	c.808T>C	chr1:41285118	ClinVar and HGMD	66	CACCGTCCCCCACCAGAGCG	no_activity	no_activity	3.585	no_activity	no_activity	no_activity	no_activity	18.441	0
19	p.Y270H	c.808T>C	chr1:41285118	ClinVar and HGMD	67	TCGCTCTGGTGGGGGACGGT	no_activity	no_activity	no_activity	no_activity	no_activity	no_activity	no_activity	0.092	no_activity
19	p.Y270H	c.808T>C	chr1:41285118	ClinVar and HGMD	68	TGGTCTACCTGGCTGAGAAG	no_activity	no_activity	no_activity	no_activity	no_activity	no_activity	no_activity	35.084	13.69
19	p.Y270H	c.808T>C	chr1:41285118	ClinVar and HGMD	69	CGAGTCGGCGTGGGAGGAGA	no_activity	no_activity	25.687	no_activity	no_activity	no_activity	no_activity	24.9	0.769
19	p.Y270H	c.808T>C	chr1:41285118	ClinVar and HGMD	70	CGCTCTGGTGGGGGACGGTG	no_activity	no_activity	1.367	no_activity	no_activity	no_activity	no_activity	27.322	18.021
19	p.Y270H	c.808T>C	chr1:41285118	ClinVar and HGMD	71	GGAGTTGGCGTCCTTCTCAG	no_activity	no_activity	no_activity	no_activity	no_activity	no_activity	no_activity	no_activity	25.476
19	p.Y270H	c.808T>C	chr1:41285118	ClinVar and HGMD	72	CCAACTCCGACTTCTCCTCC	no_activity	no_activity	no_activity	no_activity	no_activity	no_activity	no_activity	26.954	7.577
19	p.Y270H	c.808T>C	chr1:41285118	ClinVar and HGMD	73	GCCGACTCGCTCTGGTGGGG	no_activity	no_activity	no_activity	no_activity	no_activity	no_activity	no_activity	10.337	11.194
19	p.Y270H	c.808T>C	chr1:41285118	ClinVar and HGMD	74	GAGTCGGCGTGGGAGGAGAA	no_activity	no_activity	no_activity	no_activity	no_activity	no_activity	no_activity	19.149	no_activity
19	p.Y270H	c.808T>C	chr1:41285118	ClinVar and HGMD	75	GCGTGGGAGGAGAAGTCGGA	no_activity	no_activity	no_activity	no_activity	no_activity	no_activity	no_activity	28.857	no_activity
19	p.Y270H	c.808T>C	chr1:41285118	ClinVar and HGMD	76	GACTTCTCCTCCCACGCCGA	no_activity	no_activity	no_activity	no_activity	no_activity	no_activity	no_activity	8.096	no_activity
19	p.Y270H	c.808T>C	chr1:41285118	ClinVar and HGMD	77	TACCTGGCTGAGAAGGACGC	no_activity	no_activity	4.375	no_activity	no_activity	no_activity	no_activity	7.451	no_activity
19	p.Y270H	c.808T>C	chr1:41285118	ClinVar and HGMD	78	CCCCCACCAGAGCGAGTCGG	no_activity	no_activity	1.568	no_activity	no_activity	no_activity	no_activity	35.628	17.163
19	p.Y270H	c.808T>C	chr1:41285118	ClinVar and HGMD	79	TTGGCGTCCTTCTCAGCCAG	no_activity	no_activity	no_activity	no_activity	no_activity	no_activity	no_activity	28.429	22.621
19	p.Y270H	c.808T>C	chr1:41285118	ClinVar and HGMD	80	ACCGTCCCCCACCAGAGCGA	no_activity	no_activity	no_activity	no_activity	no_activity	no_activity	no_activity	10.618	no_activity
19	p.Y270H	c.808T>C	chr1:41285118	ClinVar and HGMD	81	ACCTGGCTGAGAAGGACGCC	no_activity	no_activity	no_activity	no_activity	no_activity	no_activity	no_activity	8.574	no_activity
19	p.Y270H	c.808T>C	chr1:41285118	ClinVar and HGMD	82	GGCGTGGGAGGAGAAGTCGG	no_activity	no_activity	21.162	no_activity	no_activity	no_activity	no_activity	39.832	12.226
19	p.Y270H	c.808T>C	chr1:41285118	ClinVar and HGMD	83	CCGACTTCTCCTCCCACGCC	no_activity	no_activity	no_activity	no_activity	no_activity	no_activity	no_activity	8.914	no_activity
19	p.Y270H	c.808T>C	chr1:41285118	ClinVar and HGMD	84	GTCCTTCTCAGCCAGGTAGA	no_activity	no_activity	no_activity	no_activity	no_activity	no_activity	no_activity	no_activity	13.23
20	p.L274H	c.821T>A	chr1:41285131	ClinVar and HGMD	1	ACGCCGACTCGCACTGGTGG	59.545	50.797	33.618	47.937	45.796	44.576	13.872	40.566	23.066
20	p.L274H	c.821T>A	chr1:41285131	ClinVar and HGMD	2	CTACGCCGACTCGCACTGGT	58.387	54.147	35.537	8.307	0	24.263	0.233	45.91	31.35
20	p.L274H	c.821T>A	chr1:41285131	ClinVar and HGMD	3	CGACTCGCACTGGTGGGGGA	55.663	53.759	35.687	3.915	0	7.851	0	34.381	20.554
20	p.L274H	c.821T>A	chr1:41285131	ClinVar and HGMD	4	CGTCCCCCACCAGTGCGAGT	54.506	54.454	37.742	51.8	43.048	50.219	9.365	24.903	14.061
20	p.L274H	c.821T>A	chr1:41285131	ClinVar and HGMD	5	TGGTGGGGGACGGTGCGTGA	52.167	48.749	37.001	35.737	20.636	47.115	3.499	37.858	24.565
20	p.L274H	c.821T>A	chr1:41285131	ClinVar and HGMD	6	CCTCCTACGCCGACTCGCAC	51.528	49.952	27.475	12.242	3.374	28.739	0	30.816	15.099
20	p.L274H	c.821T>A	chr1:41285131	ClinVar and HGMD	7	CCACCAGTGCGAGTCGGCGT	51.136	49.691	25.927	36.549	42.219	39.424	3.685	25.394	21.851
20	p.L274H	c.821T>A	chr1:41285131	ClinVar and HGMD	8	TACGCCGACTCGCACTGGTG	50.133	48.614	25.007	38.626	41.303	46.778	3.105	38.759	33.675
20	p.L274H	c.821T>A	chr1:41285131	ClinVar and HGMD	9	CCAGTGCGAGTCGGCGTAGG	48.145	51.692	32.359	43.231	11.939	41.101	1.977	40.589	39.228
20	p.L274H	c.821T>A	chr1:41285131	ClinVar and HGMD	10	CCTACGCCGACTCGCACTGG	45.643	45.796	19.007	36.038	23.907	37.054	3.176	32.502	26.559
20	p.L274H	c.821T>A	chr1:41285131	ClinVar and HGMD	11	CTGGTGGGGGACGGTGCGTG	44.271	41.835	14.794	34.605	1.959	29.95	0	38.333	29.765
20	p.L274H	c.821T>A	chr1:41285131	ClinVar and HGMD	12	TCCTACGCCGACTCGCACTG	37.368	26.38	no_activity	0	0.243	2.773	0	18.466	no_activity
20	p.L274H	c.821T>A	chr1:41285131	ClinVar and HGMD	13	GCACCGTCCCCCACCAGTGC	34.558	26.337	19.12	30.732	22.864	13.385	2.337	28.783	9.873
20	p.L274H	c.821T>A	chr1:41285131	ClinVar and HGMD	14	ACCAGTGCGAGTCGGCGTAG	33.767	35.109	14.242	25.855	15.017	13.226	0	33.106	15.369
20	p.L274H	c.821T>A	chr1:41285131	ClinVar and HGMD	15	AGTGCGAGTCGGCGTAGGAG	32.522	37.093	17.852	32.849	31.367	34.549	4.997	22.896	15.681
20	p.L274H	c.821T>A	chr1:41285131	ClinVar and HGMD	16	CCTCACGCACCGTCCCCCAC	30.82	27.739	15.188	9.463	0	4.717	0	27.092	no_activity
20	p.L274H	c.821T>A	chr1:41285131	ClinVar and HGMD	17	CGCCGACTCGCACTGGTGGG	29.785	24.93	18.109	0.034	0	0.754	0	22.496	28.968
20	p.L274H	c.821T>A	chr1:41285131	ClinVar and HGMD	18	GTCGGAGTTGGCGTCCTTCT	29.006	24.9	17.363	10.105	2.201	0.583	0	23.55	no_activity
20	p.L274H	c.821T>A	chr1:41285131	ClinVar and HGMD	19	CAGTGCGAGTCGGCGTAGGA	28.112	16.013	3.099	0	0	0	0.444	39.466	49.86
20	p.L274H	c.821T>A	chr1:41285131	ClinVar and HGMD	20	CACCAGTGCGAGTCGGCGTA	25.358	21.245	4.697	1.812	0	2.143	0.725	35.94	43.475
20	p.L274H	c.821T>A	chr1:41285131	ClinVar and HGMD	21	CGCACCGTCCCCCACCAGTG	24.949	24.053	17.293	12.156	7.436	16.178	2.18	38.037	52.497
20	p.L274H	c.821T>A	chr1:41285131	ClinVar and HGMD	22	GCGAGTCGGCGTAGGAGGAG	24.208	20.274	6.69	10.103	0.341	0	0	24.399	no_activity
20	p.L274H	c.821T>A	chr1:41285131	ClinVar and HGMD	23	GTGCGAGTCGGCGTAGGAGG	22.395	20.042	18.621	10.538	3.009	0.631	0	30.117	40.801
20	p.L274H	c.821T>A	chr1:41285131	ClinVar and HGMD	24	AGTCGGCGTAGGAGGAGAAG	22.319	17.953	9.54	14.479	3.154	5.611	0	no_activity	no_activity
20	p.L274H	c.821T>A	chr1:41285131	ClinVar and HGMD	25	TCACGCACCGTCCCCCACCA	19.696	23.255	10.416	0	0	0	0	11.329	no_activity
20	p.L274H	c.821T>A	chr1:41285131	ClinVar and HGMD	26	GGTGGGGGACGGTGCGTGAG	no_activity	no_activity	30.215	no_activity	no_activity	no_activity	no_activity	43.855	no_activity
20	p.L274H	c.821T>A	chr1:41285131	ClinVar and HGMD	27	CACGCACCGTCCCCCACCAG	no_activity	no_activity	no_activity	no_activity	no_activity	no_activity	no_activity	32.981	41.495
20	p.L274H	c.821T>A	chr1:41285131	ClinVar and HGMD	28	TCCTCCTACGCCGACTCGCA	16.928	12.274	no_activity	0	0	0	0	9.846	no_activity
20	p.L274H	c.821T>A	chr1:41285131	ClinVar and HGMD	29	ACTGGTGGGGGACGGTGCGT	15.106	21.718	6.911	21.442	25.345	24.864	7.419	19.4	11.254
20	p.L274H	c.821T>A	chr1:41285131	ClinVar and HGMD	30	TCGGAGTTGGCGTCCTTCTC	no_activity	no_activity	12.948	no_activity	no_activity	no_activity	no_activity	7.643	10.175
20	p.L274H	c.821T>A	chr1:41285131	ClinVar and HGMD	31	CACTGGTGGGGGACGGTGCG	14.389	13.85	0	0.026	0	0	0	31.768	45.959
20	p.L274H	c.821T>A	chr1:41285131	ClinVar and HGMD	32	CCCACCAGTGCGAGTCGGCG	13.917	10.348	0	0.845	0	0	0	12.778	3.887
20	p.L274H	c.821T>A	chr1:41285131	ClinVar and HGMD	33	CCGACTCGCACTGGTGGGGG	11.904	9.126	2.77	0	0	0	0	5.709	no_activity
20	p.L274H	c.821T>A	chr1:41285131	ClinVar and HGMD	34	ACTCGCACTGGTGGGGGACG	10.373	11.766	8.123	4.626	1.372	0	0	6.11	no_activity
20	p.L274H	c.821T>A	chr1:41285131	ClinVar and HGMD	35	GCACTGGTGGGGGACGGTGC	8.913	9.045	no_activity	9.769	3.629	0	0	6.812	no_activity
20	p.L274H	c.821T>A	chr1:41285131	ClinVar and HGMD	36	TCCCCCACCAGTGCGAGTCG	no_activity	no_activity	no_activity	no_activity	no_activity	no_activity	no_activity	1.98	no_activity
20	p.L274H	c.821T>A	chr1:41285131	ClinVar and HGMD	37	CCGTCCCCCACCAGTGCGAG	7.784	5.672	1.745	0	0	0	0	no_activity	no_activity
20	p.L274H	c.821T>A	chr1:41285131	ClinVar and HGMD	38	GACTCGCACTGGTGGGGGAC	no_activity	no_activity	13.603	no_activity	no_activity	no_activity	no_activity	31.928	24.024
20	p.L274H	c.821T>A	chr1:41285131	ClinVar and HGMD	39	CACCGTCCCCCACCAGTGCG	no_activity	no_activity	13.73	no_activity	no_activity	no_activity	no_activity	28.484	2.594
20	p.L274H	c.821T>A	chr1:41285131	ClinVar and HGMD	40	TGCGAGTCGGCGTAGGAGGA	no_activity	no_activity	no_activity	no_activity	no_activity	no_activity	no_activity	36.399	42.155
20	p.L274H	c.821T>A	chr1:41285131	ClinVar and HGMD	41	CTCGCACTGGTGGGGGACGG	no_activity	no_activity	no_activity	no_activity	no_activity	no_activity	no_activity	25.036	34.593
20	p.L274H	c.821T>A	chr1:41285131	ClinVar and HGMD	42	CTCCTACGCCGACTCGCACT	no_activity	no_activity	3.944	no_activity	no_activity	no_activity	no_activity	37.397	14.532
20	p.L274H	c.821T>A	chr1:41285131	ClinVar and HGMD	43	GTCCCCCACCAGTGCGAGTC	4.743	7.591	0.391	1.586	0.321	0	1.852	31.348	33.982
20	p.L274H	c.821T>A	chr1:41285131	ClinVar and HGMD	44	CGAGTCGGCGTAGGAGGAGA	no_activity	no_activity	27.976	no_activity	no_activity	no_activity	no_activity	27.679	2.869
20	p.L274H	c.821T>A	chr1:41285131	ClinVar and HGMD	45	CTCACGCACCGTCCCCCACC	no_activity	no_activity	21.958	no_activity	no_activity	no_activity	no_activity	45.357	40.56
20	p.L274H	c.821T>A	chr1:41285131	ClinVar and HGMD	46	CTTCTCCTCCTACGCCGACT	no_activity	no_activity	6.253	no_activity	no_activity	no_activity	no_activity	21.493	18.939
20	p.L274H	c.821T>A	chr1:41285131	ClinVar and HGMD	47	CCCTCACGCACCGTCCCCCA	no_activity	no_activity	no_activity	no_activity	no_activity	no_activity	no_activity	no_activity	23.681
20	p.L274H	c.821T>A	chr1:41285131	ClinVar and HGMD	48	GACCCTCACGCACCGTCCCC	no_activity	no_activity	no_activity	no_activity	no_activity	no_activity	no_activity	5.336	no_activity
20	p.L274H	c.821T>A	chr1:41285131	ClinVar and HGMD	49	TCGCACTGGTGGGGGACGGT	no_activity	no_activity	no_activity	no_activity	no_activity	no_activity	no_activity	1.712	no_activity
20	p.L274H	c.821T>A	chr1:41285131	ClinVar and HGMD	50	CGCACTGGTGGGGGACGGTG	no_activity	no_activity	2.581	no_activity	no_activity	no_activity	no_activity	28.722	19.576
20	p.L274H	c.821T>A	chr1:41285131	ClinVar and HGMD	51	GAGTCGGCGTAGGAGGAGAA	no_activity	no_activity	no_activity	no_activity	no_activity	no_activity	no_activity	20.228	no_activity
20	p.L274H	c.821T>A	chr1:41285131	ClinVar and HGMD	52	GCCGACTCGCACTGGTGGGG	no_activity	no_activity	no_activity	no_activity	no_activity	no_activity	no_activity	9.602	10.602
20	p.L274H	c.821T>A	chr1:41285131	ClinVar and HGMD	53	GACTTCTCCTCCTACGCCGA	no_activity	no_activity	no_activity	no_activity	no_activity	no_activity	no_activity	7.377	no_activity
20	p.L274H	c.821T>A	chr1:41285131	ClinVar and HGMD	54	CCCCCACCAGTGCGAGTCGG	no_activity	no_activity	4.508	no_activity	no_activity	no_activity	no_activity	25.871	no_activity
20	p.L274H	c.821T>A	chr1:41285131	ClinVar and HGMD	55	ACCGTCCCCCACCAGTGCGA	no_activity	no_activity	no_activity	no_activity	no_activity	no_activity	no_activity	11.073	no_activity
20	p.L274H	c.821T>A	chr1:41285131	ClinVar and HGMD	56	CTCCTCCTACGCCGACTCGC	no_activity	no_activity	no_activity	no_activity	no_activity	no_activity	no_activity	4.493	no_activity
20	p.L274H	c.821T>A	chr1:41285131	ClinVar and HGMD	57	CCCCACCAGTGCGAGTCGGC	no_activity	no_activity	no_activity	no_activity	no_activity	no_activity	no_activity	5.835	7.13
20	p.L274H	c.821T>A	chr1:41285131	ClinVar and HGMD	58	CTGAGAAGGACGCCAACTCC	no_activity	no_activity	no_activity	no_activity	no_activity	no_activity	no_activity	12.163	no_activity
20	p.L274H	c.821T>A	chr1:41285131	ClinVar and HGMD	59	TCTCCTCCTACGCCGACTCG	no_activity	no_activity	no_activity	no_activity	no_activity	no_activity	no_activity	1.709	no_activity
21	p.W275R	c.823T>C	chr1:41285133	ClinVar and HGMD	1	ACGCCGACTCGCTCCGGTGG	54.252	50.341	28.501	47.11	44.836	44.514	23.763	37.007	26.116
21	p.W275R	c.823T>C	chr1:41285133	ClinVar and HGMD	2	CGTCCCCCACCGGAGCGAGT	54.219	51.5	32.838	47.481	37.689	48.175	5.188	20.448	11.437
21	p.W275R	c.823T>C	chr1:41285133	ClinVar and HGMD	3	CCTCACGCACCGTCCCCCAC	54.123	51.163	29.915	44.79	7.06	40.893	7.388	35.223	37.966
21	p.W275R	c.823T>C	chr1:41285133	ClinVar and HGMD	4	TACGCCGACTCGCTCCGGTG	52.973	48.781	30.871	43.192	42.391	49.31	4.636	38.84	34.906
21	p.W275R	c.823T>C	chr1:41285133	ClinVar and HGMD	5	CGACTCGCTCCGGTGGGGGA	52.898	50.801	30.913	3.584	4.737	12.066	0	32.307	18.679
21	p.W275R	c.823T>C	chr1:41285133	ClinVar and HGMD	6	CCTCCTACGCCGACTCGCTC	52.697	50.543	32.048	16.615	7.564	35.001	0	26.38	8.94
21	p.W275R	c.823T>C	chr1:41285133	ClinVar and HGMD	7	CTACGCCGACTCGCTCCGGT	52.346	45.328	27.811	9.066	0	21.574	0	38.428	25.472
21	p.W275R	c.823T>C	chr1:41285133	ClinVar and HGMD	8	CGGTGGGGGACGGTGCGTGA	50.03	47.204	33.389	34.507	8.146	46.427	1.002	38.603	25.459
21	p.W275R	c.823T>C	chr1:41285133	ClinVar and HGMD	9	CCACCGGAGCGAGTCGGCGT	49.331	49.446	24.836	40.632	44.228	42.747	10.979	25.39	19.996
21	p.W275R	c.823T>C	chr1:41285133	ClinVar and HGMD	10	CCGGAGCGAGTCGGCGTAGG	47.704	50.178	31.802	24.527	0	26.731	0	39.83	37.083
21	p.W275R	c.823T>C	chr1:41285133	ClinVar and HGMD	11	CCTACGCCGACTCGCTCCGG	45.054	40.942	18.22	40.935	30.052	36.947	5.229	33.041	27.005
21	p.W275R	c.823T>C	chr1:41285133	ClinVar and HGMD	12	CCGGTGGGGGACGGTGCGTG	42.78	39.314	10.068	37.783	2.267	30.538	0	36.756	28.42
21	p.W275R	c.823T>C	chr1:41285133	ClinVar and HGMD	13	TCCTACGCCGACTCGCTCCG	39.276	24.667	no_activity	0	0	1.861	0	19.457	no_activity
21	p.W275R	c.823T>C	chr1:41285133	ClinVar and HGMD	14	TCACGCACCGTCCCCCACCG	35.547	33.606	30.798	5.34	1.598	8.694	0	17.106	27.726
21	p.W275R	c.823T>C	chr1:41285133	ClinVar and HGMD	15	GGAGCGAGTCGGCGTAGGAG	34.586	37.02	19.432	33.568	34.054	30.624	3.889	22.028	17.81
21	p.W275R	c.823T>C	chr1:41285133	ClinVar and HGMD	16	CTCACGCACCGTCCCCCACC	34.181	29.476	32.954	12.891	5.783	6.491	0.576	43.347	52.13
21	p.W275R	c.823T>C	chr1:41285133	ClinVar and HGMD	17	ACCGGAGCGAGTCGGCGTAG	32.228	36.165	15.172	25.699	20.128	21.373	2.327	31.92	14.454
21	p.W275R	c.823T>C	chr1:41285133	ClinVar and HGMD	18	CCCTCACGCACCGTCCCCCA	32.193	25.724	9.373	1.889	0	4.163	0	no_activity	no_activity
21	p.W275R	c.823T>C	chr1:41285133	ClinVar and HGMD	19	GCACCGTCCCCCACCGGAGC	26.758	23.9	9.936	20.639	14.867	11.024	0.883	17.894	5.651
21	p.W275R	c.823T>C	chr1:41285133	ClinVar and HGMD	20	GCGAGTCGGCGTAGGAGGAG	26.046	21.075	8.822	11.664	0.873	0.67	0	23.815	no_activity
21	p.W275R	c.823T>C	chr1:41285133	ClinVar and HGMD	21	CGGAGCGAGTCGGCGTAGGA	25.674	14.312	2.633	0	0	0	0.15	36.366	46.993
21	p.W275R	c.823T>C	chr1:41285133	ClinVar and HGMD	22	CGCCGACTCGCTCCGGTGGG	24.479	17.826	7.624	0	0.113	0	0	17.975	22.219
21	p.W275R	c.823T>C	chr1:41285133	ClinVar and HGMD	23	CACCGGAGCGAGTCGGCGTA	23.593	20.026	4.751	0.699	0	0	0.542	32.418	43.094
21	p.W275R	c.823T>C	chr1:41285133	ClinVar and HGMD	24	GAGCGAGTCGGCGTAGGAGG	21.847	18.796	15.14	12.976	8.773	1.552	1.936	28.325	39.178
21	p.W275R	c.823T>C	chr1:41285133	ClinVar and HGMD	25	TCCGGTGGGGGACGGTGCGT	19.89	23.863	6.417	13.385	14.321	14.293	0.018	19.187	12.463
21	p.W275R	c.823T>C	chr1:41285133	ClinVar and HGMD	26	GGTGGGGGACGGTGCGTGAG	no_activity	no_activity	33.418	no_activity	no_activity	no_activity	no_activity	42.758	no_activity
21	p.W275R	c.823T>C	chr1:41285133	ClinVar and HGMD	27	CGCACCGTCCCCCACCGGAG	18.779	14.317	13.073	5.397	2.047	8.76	1.207	32.346	47.067
21	p.W275R	c.823T>C	chr1:41285133	ClinVar and HGMD	28	CACGCACCGTCCCCCACCGG	no_activity	no_activity	10.722	no_activity	no_activity	no_activity	no_activity	27.798	35.312
21	p.W275R	c.823T>C	chr1:41285133	ClinVar and HGMD	29	TCCTCCTACGCCGACTCGCT	15.616	10.09	1.458	0	0.108	0	0	no_activity	no_activity
21	p.W275R	c.823T>C	chr1:41285133	ClinVar and HGMD	30	CCCACCGGAGCGAGTCGGCG	15.577	14.198	0	1.154	0	0	0	10.762	5.91
21	p.W275R	c.823T>C	chr1:41285133	ClinVar and HGMD	31	CCGTCCCCCACCGGAGCGAG	13.31	10.541	3.195	0	0	0	0	no_activity	no_activity
21	p.W275R	c.823T>C	chr1:41285133	ClinVar and HGMD	32	CTCCGGTGGGGGACGGTGCG	13.06	14.052	0	0	0	0	0	32.418	45.709
21	p.W275R	c.823T>C	chr1:41285133	ClinVar and HGMD	33	CCGACTCGCTCCGGTGGGGG	11.539	5.856	3.888	0	0	0	0	5.023	no_activity
21	p.W275R	c.823T>C	chr1:41285133	ClinVar and HGMD	34	AGCGAGTCGGCGTAGGAGGA	no_activity	no_activity	no_activity	no_activity	no_activity	no_activity	no_activity	38.304	43.626
21	p.W275R	c.823T>C	chr1:41285133	ClinVar and HGMD	35	ACTCGCTCCGGTGGGGGACG	8.454	10.422	7.32	2.958	0.601	0	0	2.291	no_activity
21	p.W275R	c.823T>C	chr1:41285133	ClinVar and HGMD	36	GCTCCGGTGGGGGACGGTGC	8.349	7.219	no_activity	6.528	4.23	1.587	0	3.479	no_activity
21	p.W275R	c.823T>C	chr1:41285133	ClinVar and HGMD	37	TCCCCCACCGGAGCGAGTCG	no_activity	no_activity	no_activity	no_activity	no_activity	no_activity	no_activity	0.618	no_activity
21	p.W275R	c.823T>C	chr1:41285133	ClinVar and HGMD	38	GTCCCCCACCGGAGCGAGTC	7.031	6.582	0	0.949	0.364	0	2.094	33.639	36.751
21	p.W275R	c.823T>C	chr1:41285133	ClinVar and HGMD	39	GACTCGCTCCGGTGGGGGAC	no_activity	no_activity	9.741	no_activity	no_activity	no_activity	no_activity	31.489	23.562
21	p.W275R	c.823T>C	chr1:41285133	ClinVar and HGMD	40	CTCGCTCCGGTGGGGGACGG	no_activity	no_activity	no_activity	no_activity	no_activity	no_activity	no_activity	24.32	32.858
21	p.W275R	c.823T>C	chr1:41285133	ClinVar and HGMD	41	CTCCTACGCCGACTCGCTCC	no_activity	no_activity	1.764	no_activity	no_activity	no_activity	no_activity	37.044	14.374
21	p.W275R	c.823T>C	chr1:41285133	ClinVar and HGMD	42	CGAGTCGGCGTAGGAGGAGA	no_activity	no_activity	29.142	no_activity	no_activity	no_activity	no_activity	28.483	4.812
21	p.W275R	c.823T>C	chr1:41285133	ClinVar and HGMD	43	CTTCTCCTCCTACGCCGACT	no_activity	no_activity	4.313	no_activity	no_activity	no_activity	no_activity	22.703	14.772
21	p.W275R	c.823T>C	chr1:41285133	ClinVar and HGMD	44	TCGCTCCGGTGGGGGACGGT	no_activity	no_activity	no_activity	no_activity	no_activity	no_activity	no_activity	0	no_activity
21	p.W275R	c.823T>C	chr1:41285133	ClinVar and HGMD	45	CACCGTCCCCCACCGGAGCG	no_activity	no_activity	0	no_activity	no_activity	no_activity	no_activity	13.316	1.268
21	p.W275R	c.823T>C	chr1:41285133	ClinVar and HGMD	46	CGCTCCGGTGGGGGACGGTG	no_activity	no_activity	0.765	no_activity	no_activity	no_activity	no_activity	24.814	17.254
21	p.W275R	c.823T>C	chr1:41285133	ClinVar and HGMD	47	GCCGACTCGCTCCGGTGGGG	no_activity	no_activity	no_activity	no_activity	no_activity	no_activity	no_activity	8.498	12.362
21	p.W275R	c.823T>C	chr1:41285133	ClinVar and HGMD	48	GACCCTCACGCACCGTCCCC	no_activity	no_activity	no_activity	no_activity	no_activity	no_activity	no_activity	4.88	no_activity
21	p.W275R	c.823T>C	chr1:41285133	ClinVar and HGMD	49	CCCCCACCGGAGCGAGTCGG	no_activity	no_activity	6.812	no_activity	no_activity	no_activity	no_activity	25.313	no_activity
21	p.W275R	c.823T>C	chr1:41285133	ClinVar and HGMD	50	ACCGTCCCCCACCGGAGCGA	no_activity	no_activity	no_activity	no_activity	no_activity	no_activity	no_activity	7.147	no_activity
21	p.W275R	c.823T>C	chr1:41285133	ClinVar and HGMD	51	CCCCACCGGAGCGAGTCGGC	no_activity	no_activity	no_activity	no_activity	no_activity	no_activity	no_activity	4.377	3.728
22	p.W275S	c.824G>C	chr1:41285134	ClinVar and HGMD	1	ACGCCGACTCGCTCTCGTGG	56.978	51.345	33.244	51.734	44.522	49.789	27.906	42.12	21.123
22	p.W275S	c.824G>C	chr1:41285134	ClinVar and HGMD	2	CTACGCCGACTCGCTCTCGT	54.227	48.711	30.22	12.036	1.006	25.17	0.362	42.948	24.735
22	p.W275S	c.824G>C	chr1:41285134	ClinVar and HGMD	3	CGTCCCCCACGAGAGCGAGT	54.132	53.395	39.268	50.296	46.353	50.947	15.272	26.512	11.521
22	p.W275S	c.824G>C	chr1:41285134	ClinVar and HGMD	4	CGACTCGCTCTCGTGGGGGA	53.964	52.073	35.47	1.672	0.469	7.062	0	35.226	17.181
22	p.W275S	c.824G>C	chr1:41285134	ClinVar and HGMD	5	TACGCCGACTCGCTCTCGTG	50.452	51.215	28.283	47.073	48.449	47.862	5.416	40.28	27.933
22	p.W275S	c.824G>C	chr1:41285134	ClinVar and HGMD	6	CGAGAGCGAGTCGGCGTAGG	49.876	51.881	34.121	35.757	0	30.148	0.007	40.666	37.577
22	p.W275S	c.824G>C	chr1:41285134	ClinVar and HGMD	7	CCACGAGAGCGAGTCGGCGT	49.807	48.596	25.104	33.959	22.707	36.054	6.055	26.317	21.972
22	p.W275S	c.824G>C	chr1:41285134	ClinVar and HGMD	8	CCTACGCCGACTCGCTCTCG	48.15	46.397	15.641	36.757	23.153	36.411	1.101	34.05	22.736
22	p.W275S	c.824G>C	chr1:41285134	ClinVar and HGMD	9	TCGTGGGGGACGGTGCGTGA	48.085	47.831	35.241	26.896	21.795	45.341	3.608	38.74	27.19
22	p.W275S	c.824G>C	chr1:41285134	ClinVar and HGMD	10	CTCGTGGGGGACGGTGCGTG	44.003	44.241	14.953	36.495	7.132	33.83	0.526	36.662	29.337
22	p.W275S	c.824G>C	chr1:41285134	ClinVar and HGMD	11	CTCACGCACCGTCCCCCACG	38.931	32.494	34.24	12.626	7.616	9.646	0.857	45.386	53.657
22	p.W275S	c.824G>C	chr1:41285134	ClinVar and HGMD	12	CCCTCACGCACCGTCCCCCA	36.646	30.396	28.176	9.078	0.152	14.609	0.812	43.02	52.968
22	p.W275S	c.824G>C	chr1:41285134	ClinVar and HGMD	13	TCACGCACCGTCCCCCACGA	35.635	34.883	30.352	1.672	1.052	5.541	0	21.923	24.45
22	p.W275S	c.824G>C	chr1:41285134	ClinVar and HGMD	14	CCTCACGCACCGTCCCCCAC	34.83	31.649	13.608	11.535	0	9.096	0	28.68	30.692
22	p.W275S	c.824G>C	chr1:41285134	ClinVar and HGMD	15	GAGAGCGAGTCGGCGTAGGA	33.847	27.375	12.993	4.6	0.483	0	1.368	41.426	52.349
22	p.W275S	c.824G>C	chr1:41285134	ClinVar and HGMD	16	AGAGCGAGTCGGCGTAGGAG	32.938	38.064	18.9	34.283	33.828	36.145	7.295	24.458	20.456
22	p.W275S	c.824G>C	chr1:41285134	ClinVar and HGMD	17	ACGAGAGCGAGTCGGCGTAG	32.746	34.454	13.879	19.894	12.255	15.257	0	33.723	15.698
22	p.W275S	c.824G>C	chr1:41285134	ClinVar and HGMD	18	CACGAGAGCGAGTCGGCGTA	29.38	24.727	8.806	1.477	0	3.949	0.776	38.625	45.432
22	p.W275S	c.824G>C	chr1:41285134	ClinVar and HGMD	19	CGCCGACTCGCTCTCGTGGG	28.729	22.117	20.529	0	0	0	0	22.736	25.909
22	p.W275S	c.824G>C	chr1:41285134	ClinVar and HGMD	20	GCACCGTCCCCCACGAGAGC	26.894	25.621	14.463	22.225	16.288	11.703	2.67	21.142	7.424
22	p.W275S	c.824G>C	chr1:41285134	ClinVar and HGMD	21	GCGAGTCGGCGTAGGAGGAG	26.619	21.942	9	10.635	0.241	0	0	23.433	no_activity
22	p.W275S	c.824G>C	chr1:41285134	ClinVar and HGMD	22	TCCTACGCCGACTCGCTCTC	23.796	17.938	no_activity	0	0	0	0	15.754	no_activity
22	p.W275S	c.824G>C	chr1:41285134	ClinVar and HGMD	23	GAGCGAGTCGGCGTAGGAGG	22.391	21.037	17.301	11.447	4.722	1.681	1.804	30.583	40.33
22	p.W275S	c.824G>C	chr1:41285134	ClinVar and HGMD	24	CGCACCGTCCCCCACGAGAG	21.302	16.177	17.768	3.289	0.54	4.712	1.079	39.76	49.934
22	p.W275S	c.824G>C	chr1:41285134	ClinVar and HGMD	25	TCTCGTGGGGGACGGTGCGT	18.104	23.042	5.941	10.87	7.827	8.467	0	17.86	14.179
22	p.W275S	c.824G>C	chr1:41285134	ClinVar and HGMD	26	CGTGGGGGACGGTGCGTGAG	no_activity	no_activity	30.367	no_activity	no_activity	no_activity	no_activity	42.118	no_activity
22	p.W275S	c.824G>C	chr1:41285134	ClinVar and HGMD	27	CACGCACCGTCCCCCACGAG	no_activity	no_activity	6.116	no_activity	no_activity	no_activity	no_activity	35.405	34.379
22	p.W275S	c.824G>C	chr1:41285134	ClinVar and HGMD	28	CCCACGAGAGCGAGTCGGCG	15.51	14.755	0	0.035	0	0	0	10.561	2.92
22	p.W275S	c.824G>C	chr1:41285134	ClinVar and HGMD	29	ACCCTCACGCACCGTCCCCC	no_activity	no_activity	no_activity	no_activity	no_activity	no_activity	no_activity	no_activity	8.741
22	p.W275S	c.824G>C	chr1:41285134	ClinVar and HGMD	30	CTCTCGTGGGGGACGGTGCG	12.968	14.856	0	0	0	0	0	33.983	46.573
22	p.W275S	c.824G>C	chr1:41285134	ClinVar and HGMD	31	CCGACTCGCTCTCGTGGGGG	9.726	6.052	3.411	0.118	0	0	0	4.414	no_activity
22	p.W275S	c.824G>C	chr1:41285134	ClinVar and HGMD	32	AGCGAGTCGGCGTAGGAGGA	no_activity	no_activity	no_activity	no_activity	no_activity	no_activity	no_activity	38.231	43.196
22	p.W275S	c.824G>C	chr1:41285134	ClinVar and HGMD	33	GCTCTCGTGGGGGACGGTGC	9.038	8.88	no_activity	5.584	2.891	0	0	3.921	no_activity
22	p.W275S	c.824G>C	chr1:41285134	ClinVar and HGMD	34	CCGTCCCCCACGAGAGCGAG	8.746	3.423	1.258	0	0.128	0	0	no_activity	no_activity
22	p.W275S	c.824G>C	chr1:41285134	ClinVar and HGMD	35	TCCCCCACGAGAGCGAGTCG	no_activity	no_activity	no_activity	no_activity	no_activity	no_activity	no_activity	0.567	no_activity
22	p.W275S	c.824G>C	chr1:41285134	ClinVar and HGMD	36	ACTCGCTCTCGTGGGGGACG	8.231	16.566	6.797	4.197	0.799	0	0	5.411	no_activity
22	p.W275S	c.824G>C	chr1:41285134	ClinVar and HGMD	37	GTCCCCCACGAGAGCGAGTC	6.446	6.478	0	0	0.01	0	2.047	32.98	36.566
22	p.W275S	c.824G>C	chr1:41285134	ClinVar and HGMD	38	GACTCGCTCTCGTGGGGGAC	no_activity	no_activity	10.872	no_activity	no_activity	no_activity	no_activity	30.239	20.157
22	p.W275S	c.824G>C	chr1:41285134	ClinVar and HGMD	39	TCGCTCTCGTGGGGGACGGT	no_activity	no_activity	no_activity	no_activity	no_activity	no_activity	no_activity	0	no_activity
22	p.W275S	c.824G>C	chr1:41285134	ClinVar and HGMD	40	CTCGCTCTCGTGGGGGACGG	no_activity	no_activity	no_activity	no_activity	no_activity	no_activity	no_activity	26.441	34.294
22	p.W275S	c.824G>C	chr1:41285134	ClinVar and HGMD	41	CACCGTCCCCCACGAGAGCG	no_activity	no_activity	5.563	no_activity	no_activity	no_activity	no_activity	12.996	0
22	p.W275S	c.824G>C	chr1:41285134	ClinVar and HGMD	42	CGCTCTCGTGGGGGACGGTG	no_activity	no_activity	2.73	no_activity	no_activity	no_activity	no_activity	27.407	15.408
22	p.W275S	c.824G>C	chr1:41285134	ClinVar and HGMD	43	GACCCTCACGCACCGTCCCC	no_activity	no_activity	no_activity	no_activity	no_activity	no_activity	no_activity	16.253	11.013
22	p.W275S	c.824G>C	chr1:41285134	ClinVar and HGMD	44	GCCGACTCGCTCTCGTGGGG	no_activity	no_activity	no_activity	no_activity	no_activity	no_activity	no_activity	11.045	12.002
22	p.W275S	c.824G>C	chr1:41285134	ClinVar and HGMD	45	CTCCTACGCCGACTCGCTCT	no_activity	no_activity	1.259	no_activity	no_activity	no_activity	no_activity	36.699	15.791
22	p.W275S	c.824G>C	chr1:41285134	ClinVar and HGMD	46	CCCCCACGAGAGCGAGTCGG	no_activity	no_activity	6.803	no_activity	no_activity	no_activity	no_activity	27.696	no_activity
22	p.W275S	c.824G>C	chr1:41285134	ClinVar and HGMD	47	ACCGTCCCCCACGAGAGCGA	no_activity	no_activity	no_activity	no_activity	no_activity	no_activity	no_activity	10.109	no_activity
22	p.W275S	c.824G>C	chr1:41285134	ClinVar and HGMD	48	CCCCACGAGAGCGAGTCGGC	no_activity	no_activity	no_activity	no_activity	no_activity	no_activity	no_activity	4.303	5.109
22	p.W275S	c.824G>C	chr1:41285134	ClinVar and HGMD	49	TCCTCCTACGCCGACTCGCT	no_activity	no_activity	no_activity	no_activity	no_activity	no_activity	no_activity	0	no_activity
23	p.W275C	c.825G>C	chr1:41285135	ClinVar	1	CTACGCCGACTCGCTCTGCT	60.661	51.676	28.833	7.926	0	15.441	0	47.604	31.259
23	p.W275C	c.825G>C	chr1:41285135	ClinVar	2	CGACTCGCTCTGCTGGGGGA	53.317	50.945	38.533	4.042	0.158	9.153	0	36.7	20.643
23	p.W275C	c.825G>C	chr1:41285135	ClinVar	3	CGTCCCCCAGCAGAGCGAGT	53.216	51.187	40.199	47.818	18.029	49.026	2.994	23.168	12.132
23	p.W275C	c.825G>C	chr1:41285135	ClinVar	4	ACGCCGACTCGCTCTGCTGG	52.209	47.534	24.195	45.222	40.255	43.824	23.137	37.965	16.182
23	p.W275C	c.825G>C	chr1:41285135	ClinVar	5	TGCTGGGGGACGGTGCGTGA	52.095	49.051	37.102	31.258	9.008	42.798	3.117	36.022	29.053
23	p.W275C	c.825G>C	chr1:41285135	ClinVar	6	TACGCCGACTCGCTCTGCTG	52.072	49.628	28.876	47.284	46.056	47.581	5.07	40.596	29.364
23	p.W275C	c.825G>C	chr1:41285135	ClinVar	7	CCAGCAGAGCGAGTCGGCGT	52.03	50.871	28.807	43.459	42.705	45.446	9.212	28.265	24.425
23	p.W275C	c.825G>C	chr1:41285135	ClinVar	8	GCAGAGCGAGTCGGCGTAGG	48.726	51.3	33.873	45.917	39.829	39.277	24.448	40.583	41.57
23	p.W275C	c.825G>C	chr1:41285135	ClinVar	9	CTGCTGGGGGACGGTGCGTG	44.401	45.39	15.934	25.268	0	18.189	0	37.907	32.634
23	p.W275C	c.825G>C	chr1:41285135	ClinVar	10	CCTACGCCGACTCGCTCTGC	39.267	39.979	6.298	33.446	22.002	32.52	0.974	27.198	13.82
23	p.W275C	c.825G>C	chr1:41285135	ClinVar	11	AGCAGAGCGAGTCGGCGTAG	37.215	36.077	16.759	25.651	9.873	12.314	0	35.198	18.32
23	p.W275C	c.825G>C	chr1:41285135	ClinVar	12	TCACGCACCGTCCCCCAGCA	36.759	34.456	16.941	0	0	0	0	20.255	27.658
23	p.W275C	c.825G>C	chr1:41285135	ClinVar	13	GACCCTCACGCACCGTCCCC	33.339	30.304	26.852	25.403	5.752	4.111	1.5	14.74	no_activity
23	p.W275C	c.825G>C	chr1:41285135	ClinVar	14	AGAGCGAGTCGGCGTAGGAG	32.546	39.73	19.137	35.078	35.712	36.284	1.778	26.213	22.371
23	p.W275C	c.825G>C	chr1:41285135	ClinVar	15	CCTCACGCACCGTCCCCCAG	32.466	30.05	12.536	10.498	0.015	7.672	0	27.697	no_activity
23	p.W275C	c.825G>C	chr1:41285135	ClinVar	16	CGCCGACTCGCTCTGCTGGG	30.754	26.206	26.647	1.601	0	1.161	0	25.828	27.77
23	p.W275C	c.825G>C	chr1:41285135	ClinVar	17	CAGAGCGAGTCGGCGTAGGA	30.335	18.883	3.807	0	0	0	0.248	38.711	50.458
23	p.W275C	c.825G>C	chr1:41285135	ClinVar	18	GCACCGTCCCCCAGCAGAGC	30.053	23.375	13.58	23.165	18.192	13.471	3.333	21.906	6.83
23	p.W275C	c.825G>C	chr1:41285135	ClinVar	19	CAGCAGAGCGAGTCGGCGTA	28.125	23.87	6.998	1.131	0	1.202	0.564	39.268	46.381
23	p.W275C	c.825G>C	chr1:41285135	ClinVar	20	CGCACCGTCCCCCAGCAGAG	28.014	22.3	23.497	8.923	2.819	12.655	1.796	44.194	57.069
23	p.W275C	c.825G>C	chr1:41285135	ClinVar	21	CTCACGCACCGTCCCCCAGC	25.976	22.322	17.798	3.249	0.386	2.676	0.649	42.848	48.026
23	p.W275C	c.825G>C	chr1:41285135	ClinVar	22	TCCTACGCCGACTCGCTCTG	22.571	16.094	no_activity	0	0	0	0	9.264	no_activity
23	p.W275C	c.825G>C	chr1:41285135	ClinVar	23	GAGCGAGTCGGCGTAGGAGG	19.998	18.623	16.544	10.485	2.534	0.422	1.432	29.224	39.74
23	p.W275C	c.825G>C	chr1:41285135	ClinVar	24	GCTGGGGGACGGTGCGTGAG	no_activity	no_activity	31.721	no_activity	no_activity	no_activity	no_activity	43.767	no_activity
23	p.W275C	c.825G>C	chr1:41285135	ClinVar	25	TCTGCTGGGGGACGGTGCGT	19.525	23.948	5.391	14.176	22.077	19.368	0	21.796	14.591
23	p.W275C	c.825G>C	chr1:41285135	ClinVar	26	CCGTCCCCCAGCAGAGCGAG	13.823	6.96	1.491	0	0	0	0	no_activity	no_activity
23	p.W275C	c.825G>C	chr1:41285135	ClinVar	27	CACGCACCGTCCCCCAGCAG	no_activity	no_activity	11.629	no_activity	no_activity	no_activity	no_activity	29.52	36.04
23	p.W275C	c.825G>C	chr1:41285135	ClinVar	28	CTCTGCTGGGGGACGGTGCG	12.708	10.981	0	0	0.047	0	0	30.865	44.17
23	p.W275C	c.825G>C	chr1:41285135	ClinVar	29	CCCAGCAGAGCGAGTCGGCG	12.209	9.737	0	0	0	0	0	9.865	3.83
23	p.W275C	c.825G>C	chr1:41285135	ClinVar	30	GCTCTGCTGGGGGACGGTGC	10.534	10.947	no_activity	9.085	5.681	0	0	3.765	no_activity
23	p.W275C	c.825G>C	chr1:41285135	ClinVar	31	CCGACTCGCTCTGCTGGGGG	10.356	4.742	3.412	0	0	0	0	4.284	no_activity
23	p.W275C	c.825G>C	chr1:41285135	ClinVar	32	AGCGAGTCGGCGTAGGAGGA	no_activity	no_activity	no_activity	no_activity	no_activity	no_activity	no_activity	39.031	43.651
23	p.W275C	c.825G>C	chr1:41285135	ClinVar	33	ACTCGCTCTGCTGGGGGACG	9.339	16.354	6.525	2.458	0.703	0	0	3.021	no_activity
23	p.W275C	c.825G>C	chr1:41285135	ClinVar	34	TCCCCCAGCAGAGCGAGTCG	no_activity	no_activity	no_activity	no_activity	no_activity	no_activity	no_activity	3.495	no_activity
23	p.W275C	c.825G>C	chr1:41285135	ClinVar	35	GTCCCCCAGCAGAGCGAGTC	6.981	7.404	0	0.667	0	0	1.781	34.329	37.944
23	p.W275C	c.825G>C	chr1:41285135	ClinVar	36	CTCGCTCTGCTGGGGGACGG	no_activity	no_activity	no_activity	no_activity	no_activity	no_activity	no_activity	27.705	38.918
23	p.W275C	c.825G>C	chr1:41285135	ClinVar	37	ACCCTCACGCACCGTCCCCC	no_activity	no_activity	9.174	no_activity	no_activity	no_activity	no_activity	21.246	18.893
23	p.W275C	c.825G>C	chr1:41285135	ClinVar	38	CCCTCACGCACCGTCCCCCA	no_activity	no_activity	no_activity	no_activity	no_activity	no_activity	no_activity	13.325	27.467
23	p.W275C	c.825G>C	chr1:41285135	ClinVar	39	GACTCGCTCTGCTGGGGGAC	no_activity	no_activity	10.521	no_activity	no_activity	no_activity	no_activity	29.675	22.571
23	p.W275C	c.825G>C	chr1:41285135	ClinVar	40	TCGCTCTGCTGGGGGACGGT	no_activity	no_activity	no_activity	no_activity	no_activity	no_activity	no_activity	2.62	no_activity
23	p.W275C	c.825G>C	chr1:41285135	ClinVar	41	CCTCCTACGCCGACTCGCTC	no_activity	no_activity	2.239	no_activity	no_activity	no_activity	no_activity	16.785	4.506
23	p.W275C	c.825G>C	chr1:41285135	ClinVar	42	AGACCCTCACGCACCGTCCC	no_activity	no_activity	no_activity	no_activity	no_activity	no_activity	no_activity	no_activity	20.818
23	p.W275C	c.825G>C	chr1:41285135	ClinVar	43	CGCTCTGCTGGGGGACGGTG	no_activity	no_activity	1.014	no_activity	no_activity	no_activity	no_activity	26.698	17.71
23	p.W275C	c.825G>C	chr1:41285135	ClinVar	44	CACCGTCCCCCAGCAGAGCG	no_activity	no_activity	6.507	no_activity	no_activity	no_activity	no_activity	18.096	0
23	p.W275C	c.825G>C	chr1:41285135	ClinVar	45	TCCTCCTACGCCGACTCGCT	1.843	3.897	no_activity	0	0.148	0.229	0	no_activity	no_activity
23	p.W275C	c.825G>C	chr1:41285135	ClinVar	46	GCCGACTCGCTCTGCTGGGG	no_activity	no_activity	no_activity	no_activity	no_activity	no_activity	no_activity	12.957	11.38
23	p.W275C	c.825G>C	chr1:41285135	ClinVar	47	ACCGTCCCCCAGCAGAGCGA	no_activity	no_activity	no_activity	no_activity	no_activity	no_activity	no_activity	10.418	no_activity
23	p.W275C	c.825G>C	chr1:41285135	ClinVar	48	CCCCCAGCAGAGCGAGTCGG	no_activity	no_activity	6.331	no_activity	no_activity	no_activity	no_activity	26.182	no_activity
23	p.W275C	c.825G>C	chr1:41285135	ClinVar	49	CTCCTACGCCGACTCGCTCT	no_activity	no_activity	no_activity	no_activity	no_activity	no_activity	no_activity	5.035	no_activity
23	p.W275C	c.825G>C	chr1:41285135	ClinVar	50	GACGGTGCGTGAGGGTCTTT	no_activity	no_activity	no_activity	no_activity	no_activity	no_activity	no_activity	15.717	15.887
23	p.W275C	c.825G>C	chr1:41285135	ClinVar	51	CCCCAGCAGAGCGAGTCGGC	no_activity	no_activity	no_activity	no_activity	no_activity	no_activity	no_activity	5.895	8.416
23	p.W275C	c.825G>C	chr1:41285135	ClinVar	52	GGACGGTGCGTGAGGGTCTT	no_activity	no_activity	4.329	no_activity	no_activity	no_activity	no_activity	27.391	19.366
24	p.W276S	c.827G>C	chr1:41285137	ClinVar and HGMD	1	ACGCCGACTCGCTCTGGTCG	56.596	50.204	26.45	46.987	45.481	44.114	16.241	39.354	15.306
24	p.W276S	c.827G>C	chr1:41285137	ClinVar and HGMD	2	CTACGCCGACTCGCTCTGGT	55.958	50.429	30.102	3.351	0	16.801	0	39.998	28.088
24	p.W276S	c.827G>C	chr1:41285137	ClinVar and HGMD	3	CGACCAGAGCGAGTCGGCGT	54.271	50.244	26.505	37.662	30.083	39.627	3.546	26.706	21.836
24	p.W276S	c.827G>C	chr1:41285137	ClinVar and HGMD	4	CGTCCCCGACCAGAGCGAGT	53.714	53.154	40.219	49.583	50	52.736	16.538	25.862	15.627
24	p.W276S	c.827G>C	chr1:41285137	ClinVar and HGMD	5	CGACTCGCTCTGGTCGGGGA	53.488	51.856	34.653	0.099	0	3.923	0	37.108	18.265
24	p.W276S	c.827G>C	chr1:41285137	ClinVar and HGMD	6	TGGTCGGGGACGGTGCGTGA	53.003	50.993	38.854	35.518	21.946	47.201	2.067	38.871	29.566
24	p.W276S	c.827G>C	chr1:41285137	ClinVar and HGMD	7	CCTCCTACGCCGACTCGCTC	52.514	49.269	31.895	18.734	8.638	32.64	0	36.712	17.908
24	p.W276S	c.827G>C	chr1:41285137	ClinVar and HGMD	8	CCAGAGCGAGTCGGCGTAGG	50.216	52.225	32.495	40.489	3.671	38.99	0.421	41.182	40.67
24	p.W276S	c.827G>C	chr1:41285137	ClinVar and HGMD	9	TACGCCGACTCGCTCTGGTC	47.842	44.104	19.069	34.807	34.731	42.826	1.822	38.042	20.351
24	p.W276S	c.827G>C	chr1:41285137	ClinVar and HGMD	10	CTGGTCGGGGACGGTGCGTG	46.255	44.514	17.608	24.853	0	20.932	0	38.166	30.852
24	p.W276S	c.827G>C	chr1:41285137	ClinVar and HGMD	11	ACCAGAGCGAGTCGGCGTAG	36.441	35.167	14.91	30.975	22.497	16.279	0	34.228	17.609
24	p.W276S	c.827G>C	chr1:41285137	ClinVar and HGMD	12	AGAGCGAGTCGGCGTAGGAG	33.534	38.705	18.338	34.718	35.251	35.564	1.087	22.821	19.626
24	p.W276S	c.827G>C	chr1:41285137	ClinVar and HGMD	13	GACCAGAGCGAGTCGGCGTA	32.271	27.45	9.32	15.999	0	1.048	2.715	39.762	46.595
24	p.W276S	c.827G>C	chr1:41285137	ClinVar and HGMD	14	TCACGCACCGTCCCCGACCA	31.677	33.571	23.069	0.678	0	0.161	0	18.491	21.014
24	p.W276S	c.827G>C	chr1:41285137	ClinVar and HGMD	15	GCACCGTCCCCGACCAGAGC	29.851	22.297	14.57	20.468	13.545	8.729	0.731	19.86	5.536
24	p.W276S	c.827G>C	chr1:41285137	ClinVar and HGMD	16	CAGAGCGAGTCGGCGTAGGA	27.957	14.823	0	0	0	0	0.161	37.565	49.011
24	p.W276S	c.827G>C	chr1:41285137	ClinVar and HGMD	17	CGCACCGTCCCCGACCAGAG	25.812	22.116	18.602	2.818	1.543	8.708	1.691	40.058	52.414
24	p.W276S	c.827G>C	chr1:41285137	ClinVar and HGMD	18	CCTCACGCACCGTCCCCGAC	24.988	17.734	3.037	2.607	0	0	0	19.49	no_activity
24	p.W276S	c.827G>C	chr1:41285137	ClinVar and HGMD	19	CGCCGACTCGCTCTGGTCGG	23.624	19.516	20.349	0	0	0.124	0	18.819	18.567
24	p.W276S	c.827G>C	chr1:41285137	ClinVar and HGMD	20	CTCACGCACCGTCCCCGACC	23.507	17.619	15.706	3.278	0	2.483	0.293	37.629	50.009
24	p.W276S	c.827G>C	chr1:41285137	ClinVar and HGMD	21	AGACCCTCACGCACCGTCCC	20.041	20.734	27.128	15.249	6.362	6.204	0.599	30.538	39.46
24	p.W276S	c.827G>C	chr1:41285137	ClinVar and HGMD	22	GGTCGGGGACGGTGCGTGAG	no_activity	no_activity	33.469	no_activity	no_activity	no_activity	no_activity	41.948	no_activity
24	p.W276S	c.827G>C	chr1:41285137	ClinVar and HGMD	23	TCTGGTCGGGGACGGTGCGT	19.42	25.514	7.41	13.431	13.333	12.72	0	21.452	13.34
24	p.W276S	c.827G>C	chr1:41285137	ClinVar and HGMD	24	CACGCACCGTCCCCGACCAG	no_activity	no_activity	9.116	no_activity	no_activity	no_activity	no_activity	32.056	37.219
24	p.W276S	c.827G>C	chr1:41285137	ClinVar and HGMD	25	CTCTGGTCGGGGACGGTGCG	15.84	13.639	0	0	0	0	0	32.82	46.01
24	p.W276S	c.827G>C	chr1:41285137	ClinVar and HGMD	26	CCTACGCCGACTCGCTCTGG	14.963	14.542	1.188	1.86	0	1.445	0	no_activity	no_activity
24	p.W276S	c.827G>C	chr1:41285137	ClinVar and HGMD	27	TCCTCCTACGCCGACTCGCT	14.8	9.012	no_activity	0	0.283	0	0	10.16	no_activity
24	p.W276S	c.827G>C	chr1:41285137	ClinVar and HGMD	28	CCGACCAGAGCGAGTCGGCG	13.923	11.856	0	0	0	0	0	7.945	4.889
24	p.W276S	c.827G>C	chr1:41285137	ClinVar and HGMD	29	CCGTCCCCGACCAGAGCGAG	13.737	9.747	2.635	0	0	0	0	no_activity	no_activity
24	p.W276S	c.827G>C	chr1:41285137	ClinVar and HGMD	30	GCTCTGGTCGGGGACGGTGC	12.44	10.741	no_activity	8.132	5.373	0	0	5.973	no_activity
24	p.W276S	c.827G>C	chr1:41285137	ClinVar and HGMD	31	CCGACTCGCTCTGGTCGGGG	11.824	8.863	4.869	0	0	0	0	4.207	no_activity
24	p.W276S	c.827G>C	chr1:41285137	ClinVar and HGMD	32	TCCCCGACCAGAGCGAGTCG	no_activity	no_activity	no_activity	no_activity	no_activity	no_activity	no_activity	1.377	no_activity
24	p.W276S	c.827G>C	chr1:41285137	ClinVar and HGMD	33	ACTCGCTCTGGTCGGGGACG	8.503	16.805	5.147	3.923	0.991	0.184	0	2.971	no_activity
24	p.W276S	c.827G>C	chr1:41285137	ClinVar and HGMD	34	CTCCTACGCCGACTCGCTCT	no_activity	no_activity	28.846	no_activity	no_activity	no_activity	no_activity	27.136	no_activity
24	p.W276S	c.827G>C	chr1:41285137	ClinVar and HGMD	35	GTCCCCGACCAGAGCGAGTC	5.974	7.226	0.197	1.118	0	0	2.248	35.803	39.157
24	p.W276S	c.827G>C	chr1:41285137	ClinVar and HGMD	36	GACTCGCTCTGGTCGGGGAC	no_activity	no_activity	6.132	no_activity	no_activity	no_activity	no_activity	33.578	23.409
24	p.W276S	c.827G>C	chr1:41285137	ClinVar and HGMD	37	CTCGCTCTGGTCGGGGACGG	no_activity	no_activity	no_activity	no_activity	no_activity	no_activity	no_activity	24.696	37.429
24	p.W276S	c.827G>C	chr1:41285137	ClinVar and HGMD	38	GACCCTCACGCACCGTCCCC	no_activity	no_activity	9.585	no_activity	no_activity	no_activity	no_activity	7.206	no_activity
24	p.W276S	c.827G>C	chr1:41285137	ClinVar and HGMD	39	TCGCTCTGGTCGGGGACGGT	no_activity	no_activity	no_activity	no_activity	no_activity	no_activity	no_activity	0	no_activity
24	p.W276S	c.827G>C	chr1:41285137	ClinVar and HGMD	40	CACCGTCCCCGACCAGAGCG	no_activity	no_activity	8.014	no_activity	no_activity	no_activity	no_activity	16.693	0
24	p.W276S	c.827G>C	chr1:41285137	ClinVar and HGMD	41	CGCTCTGGTCGGGGACGGTG	no_activity	no_activity	5.015	no_activity	no_activity	no_activity	no_activity	31.11	18.219
24	p.W276S	c.827G>C	chr1:41285137	ClinVar and HGMD	42	CCCTCACGCACCGTCCCCGA	no_activity	no_activity	no_activity	no_activity	no_activity	no_activity	no_activity	no_activity	13.04
24	p.W276S	c.827G>C	chr1:41285137	ClinVar and HGMD	43	CCCCGACCAGAGCGAGTCGG	no_activity	no_activity	5.005	no_activity	no_activity	no_activity	no_activity	24.381	no_activity
24	p.W276S	c.827G>C	chr1:41285137	ClinVar and HGMD	44	GACGGTGCGTGAGGGTCTTT	no_activity	no_activity	no_activity	no_activity	no_activity	no_activity	no_activity	14.856	16.314
24	p.W276S	c.827G>C	chr1:41285137	ClinVar and HGMD	45	ACCGTCCCCGACCAGAGCGA	no_activity	no_activity	no_activity	no_activity	no_activity	no_activity	no_activity	9.981	no_activity
24	p.W276S	c.827G>C	chr1:41285137	ClinVar and HGMD	46	GCCGACTCGCTCTGGTCGGG	no_activity	no_activity	no_activity	no_activity	no_activity	no_activity	no_activity	10.721	9.982
24	p.W276S	c.827G>C	chr1:41285137	ClinVar and HGMD	47	TCCTACGCCGACTCGCTCTG	no_activity	no_activity	no_activity	no_activity	no_activity	no_activity	no_activity	6.62	no_activity
24	p.W276S	c.827G>C	chr1:41285137	ClinVar and HGMD	48	CCCGACCAGAGCGAGTCGGC	no_activity	no_activity	no_activity	no_activity	no_activity	no_activity	no_activity	7.977	7.667
24	p.W276S	c.827G>C	chr1:41285137	ClinVar and HGMD	49	GGACGGTGCGTGAGGGTCTT	no_activity	no_activity	4.167	no_activity	no_activity	no_activity	no_activity	28.078	20.288
25	p.W276L	c.827G>T	chr1:41285137	HGMD	1	GGTGCGTGAGGGTCTTTGTA	66.572	61.918	55.603	60.011	56.93	55.491	45.668	53.877	42.777
25	p.W276L	c.827G>T	chr1:41285137	HGMD	2	ACGCCGACTCGCTCTGGTTG	59.525	51.12	28.653	47.018	45.363	44.811	15.852	41.959	16.699
25	p.W276L	c.827G>T	chr1:41285137	HGMD	3	CGTCCCCAACCAGAGCGAGT	54.861	53.093	41.892	51.588	46.198	52.925	11.683	27.321	17.319
25	p.W276L	c.827G>T	chr1:41285137	HGMD	4	CTACGCCGACTCGCTCTGGT	54.725	49.214	26.898	2.843	0	14.982	0	42.267	33.577
25	p.W276L	c.827G>T	chr1:41285137	HGMD	5	CGACTCGCTCTGGTTGGGGA	54.571	52.407	37.391	0.49	0	4.587	0	39.756	14.533
25	p.W276L	c.827G>T	chr1:41285137	HGMD	6	TGGTTGGGGACGGTGCGTGA	54.554	52.013	40.137	37.706	22.831	48.778	2.55	40.069	31.439
25	p.W276L	c.827G>T	chr1:41285137	HGMD	7	TACGCCGACTCGCTCTGGTT	53.604	49.092	25.828	42.148	35.218	45.837	3.422	38.304	32.019
25	p.W276L	c.827G>T	chr1:41285137	HGMD	8	GTAGGGCTGCCCTTCTCCCT	53.072	46.752	30.611	52.782	45.409	48.344	43.142	36.13	29.152
25	p.W276L	c.827G>T	chr1:41285137	HGMD	9	GTAGGAGGAGAAGTCGGAGT	52.678	51.133	40.132	49.23	52.412	49.108	37.729	32.551	23.564
25	p.W276L	c.827G>T	chr1:41285137	HGMD	10	CAACCAGAGCGAGTCGGCGT	52.641	49.248	26.881	37.716	36.37	40.591	10.367	27.75	23.102
25	p.W276L	c.827G>T	chr1:41285137	HGMD	11	CGGTGCGTGAGGGTCTTTGT	52.016	46.765	30.579	12.522	0	30.359	1.252	42.268	35.576
25	p.W276L	c.827G>T	chr1:41285137	HGMD	12	CCTCCTACGCCGACTCGCTC	51.608	49.223	26.656	17.676	7.72	30.57	0	34.651	14.954
25	p.W276L	c.827G>T	chr1:41285137	HGMD	13	TGTAGGGCTGCCCTTCTCCC	51.342	46.728	27.531	46.156	29.858	43.076	11.304	43.751	38.835
25	p.W276L	c.827G>T	chr1:41285137	HGMD	14	CCAGAGCGAGTCGGCGTAGG	49.542	51.791	32.978	38.194	2.199	37.333	0.004	40.678	39.955
25	p.W276L	c.827G>T	chr1:41285137	HGMD	15	GTCGGCGTAGGAGGAGAAGT	47.996	48.885	33.045	45.942	38.165	39.103	35.1	29.315	24.706
25	p.W276L	c.827G>T	chr1:41285137	HGMD	16	CTGGTTGGGGACGGTGCGTG	46.754	43.184	16.886	20.39	0	18.222	0	38.737	32.282
25	p.W276L	c.827G>T	chr1:41285137	HGMD	17	GGGAGAAGGGCAGCCCTACA	40.029	39.339	21.771	26.363	2.381	12.287	0	39.504	34.878
25	p.W276L	c.827G>T	chr1:41285137	HGMD	18	TCACGCACCGTCCCCAACCA	37.013	37.417	30.438	0.798	0.167	4.648	0	22.572	25.69
25	p.W276L	c.827G>T	chr1:41285137	HGMD	19	ACCAGAGCGAGTCGGCGTAG	36.069	35.48	14.762	27.998	19.619	14.763	0	35.726	15.537
25	p.W276L	c.827G>T	chr1:41285137	HGMD	20	AGAGCGAGTCGGCGTAGGAG	34.067	39.281	18.779	34.528	35.962	35.427	1.191	23.585	19.156
25	p.W276L	c.827G>T	chr1:41285137	HGMD	21	CTCACGCACCGTCCCCAACC	32.308	27.877	26.118	4.758	0.912	6.296	0.34	44.762	55.017
25	p.W276L	c.827G>T	chr1:41285137	HGMD	22	TAGGGCTGCCCTTCTCCCTG	30.248	25.84	31.685	14.234	3.52	8.152	0.531	34.373	38.695
25	p.W276L	c.827G>T	chr1:41285137	HGMD	23	GCACCGTCCCCAACCAGAGC	30.018	23.368	14.317	23.82	16.068	11.643	1.296	20.937	6.202
25	p.W276L	c.827G>T	chr1:41285137	HGMD	24	TTGTAGGGCTGCCCTTCTCC	29.723	16.939	no_activity	2.506	0.545	2.695	0	19.724	no_activity
25	p.W276L	c.827G>T	chr1:41285137	HGMD	25	AACCAGAGCGAGTCGGCGTA	28.842	27.171	8.798	9.072	0.954	4.374	1.192	39.671	46.274
25	p.W276L	c.827G>T	chr1:41285137	HGMD	26	CCTCACGCACCGTCCCCAAC	28.673	21.441	8.108	3.33	0	1.29	0	21.785	no_activity
25	p.W276L	c.827G>T	chr1:41285137	HGMD	27	CAGAGCGAGTCGGCGTAGGA	27.112	14.239	0	0	0	0	0.186	37.388	48.02
25	p.W276L	c.827G>T	chr1:41285137	HGMD	28	GCGAGTCGGCGTAGGAGGAG	26.207	22.073	9.291	10.851	0.679	0	0	23.705	no_activity
25	p.W276L	c.827G>T	chr1:41285137	HGMD	29	ACGGTGCGTGAGGGTCTTTG	25.678	29.136	3.241	20.205	13.775	16.059	0.779	30.796	21.1
25	p.W276L	c.827G>T	chr1:41285137	HGMD	30	GGAGAAGGGCAGCCCTACAA	25.583	28.51	38.208	26.778	16.233	17.534	5.978	39.834	45.688
25	p.W276L	c.827G>T	chr1:41285137	HGMD	31	CGCCGACTCGCTCTGGTTGG	25.356	20.726	22.428	0	0	0	0	19.617	17.159
25	p.W276L	c.827G>T	chr1:41285137	HGMD	32	CGGCGTAGGAGGAGAAGTCG	23.945	19.633	18.212	3.321	0	0	0	26.973	15.264
25	p.W276L	c.827G>T	chr1:41285137	HGMD	33	AGTCGGCGTAGGAGGAGAAG	23.449	18.341	10.046	15.208	3.546	5.949	0	no_activity	no_activity
25	p.W276L	c.827G>T	chr1:41285137	HGMD	34	CGCACCGTCCCCAACCAGAG	23.318	17.822	19.922	2.455	0.335	3.64	1.573	39.804	50.674
25	p.W276L	c.827G>T	chr1:41285137	HGMD	35	TCGGCGTAGGAGGAGAAGTC	22.645	20.386	9.65	6.981	1.476	9.244	0.128	43.936	51.812
25	p.W276L	c.827G>T	chr1:41285137	HGMD	36	TAGGAGGAGAAGTCGGAGTT	22.344	21.175	9.446	1.47	0	1.627	0	36.741	42.874
25	p.W276L	c.827G>T	chr1:41285137	HGMD	37	GGTTGGGGACGGTGCGTGAG	no_activity	no_activity	34.864	no_activity	no_activity	no_activity	no_activity	44.216	no_activity
25	p.W276L	c.827G>T	chr1:41285137	HGMD	38	GAGCGAGTCGGCGTAGGAGG	21.533	19.124	17.419	11.267	3.234	0.659	1.232	30.073	40.043
25	p.W276L	c.827G>T	chr1:41285137	HGMD	39	CGTAGGAGGAGAAGTCGGAG	18.974	17.264	no_activity	1.135	0	0	0	15.181	no_activity
25	p.W276L	c.827G>T	chr1:41285137	HGMD	40	CACGCACCGTCCCCAACCAG	no_activity	no_activity	14.891	no_activity	no_activity	no_activity	no_activity	37.358	41.934
25	p.W276L	c.827G>T	chr1:41285137	HGMD	41	TCTGGTTGGGGACGGTGCGT	17.397	25.888	7.739	10.236	11.427	12.834	0	21.185	12.448
25	p.W276L	c.827G>T	chr1:41285137	HGMD	42	AACTCCGACTTCTCCTCCTA	15.311	16.78	24.095	4.164	1.12	0.936	1.321	21.134	11.56
25	p.W276L	c.827G>T	chr1:41285137	HGMD	43	TCCTCCTACGCCGACTCGCT	14.793	9.455	no_activity	0	0.338	0	0	8.083	no_activity
25	p.W276L	c.827G>T	chr1:41285137	HGMD	44	GTGCGTGAGGGTCTTTGTAG	14.528	11.228	16.246	9.35	3.571	2.709	0	37.178	26.781
25	p.W276L	c.827G>T	chr1:41285137	HGMD	45	CCGTCCCCAACCAGAGCGAG	14.481	8.429	3.373	0	0	0	0	no_activity	no_activity
25	p.W276L	c.827G>T	chr1:41285137	HGMD	46	CCAACCAGAGCGAGTCGGCG	13.63	12.704	0	0	0	0	0	9.633	6.677
25	p.W276L	c.827G>T	chr1:41285137	HGMD	47	CTCTGGTTGGGGACGGTGCG	13.288	11.83	0	0	0	0	0	30.844	45.397
25	p.W276L	c.827G>T	chr1:41285137	HGMD	48	GCTCTGGTTGGGGACGGTGC	13.246	9.807	no_activity	8.503	3.44	0.649	0	7.177	no_activity
25	p.W276L	c.827G>T	chr1:41285137	HGMD	49	CCGACTCGCTCTGGTTGGGG	12.814	8.788	5.298	0	0	0	0	5.472	no_activity
25	p.W276L	c.827G>T	chr1:41285137	HGMD	50	CAGCCCTACAAAGACCCTCA	no_activity	no_activity	27.352	no_activity	no_activity	no_activity	no_activity	39.788	37.993
25	p.W276L	c.827G>T	chr1:41285137	HGMD	51	TCCGACTTCTCCTCCTACGC	12.488	13.428	20.842	3.219	1.379	0.8	0.235	25.732	19.554
25	p.W276L	c.827G>T	chr1:41285137	HGMD	52	CCTACGCCGACTCGCTCTGG	11.591	15.981	no_activity	2.231	0	2.058	0	2.939	no_activity
25	p.W276L	c.827G>T	chr1:41285137	HGMD	53	AGCGAGTCGGCGTAGGAGGA	no_activity	no_activity	no_activity	no_activity	no_activity	no_activity	no_activity	38.96	43.878
25	p.W276L	c.827G>T	chr1:41285137	HGMD	54	TCCCCAACCAGAGCGAGTCG	no_activity	no_activity	no_activity	no_activity	no_activity	no_activity	no_activity	1.572	no_activity
25	p.W276L	c.827G>T	chr1:41285137	HGMD	55	ACTCGCTCTGGTTGGGGACG	8.548	17.464	6.69	3.597	0.653	0.482	0	5.129	no_activity
25	p.W276L	c.827G>T	chr1:41285137	HGMD	56	GGAGGAGAAGTCGGAGTTGG	no_activity	no_activity	32.828	no_activity	no_activity	no_activity	no_activity	39.041	no_activity
25	p.W276L	c.827G>T	chr1:41285137	HGMD	57	AGGAGGAGAAGTCGGAGTTG	no_activity	no_activity	no_activity	no_activity	no_activity	no_activity	no_activity	16.492	no_activity
25	p.W276L	c.827G>T	chr1:41285137	HGMD	58	GACTCGCTCTGGTTGGGGAC	no_activity	no_activity	10.275	no_activity	no_activity	no_activity	no_activity	34.495	25.713
25	p.W276L	c.827G>T	chr1:41285137	HGMD	59	CTCGCTCTGGTTGGGGACGG	no_activity	no_activity	no_activity	no_activity	no_activity	no_activity	no_activity	26.657	39.725
25	p.W276L	c.827G>T	chr1:41285137	HGMD	60	GTCCCCAACCAGAGCGAGTC	5.862	5.973	0	0.885	0	0	2.167	37.405	39.291
25	p.W276L	c.827G>T	chr1:41285137	HGMD	61	AGGGAGAAGGGCAGCCCTAC	no_activity	no_activity	no_activity	no_activity	no_activity	no_activity	no_activity	33.487	38.214
25	p.W276L	c.827G>T	chr1:41285137	HGMD	62	CGAGTCGGCGTAGGAGGAGA	no_activity	no_activity	28.939	no_activity	no_activity	no_activity	no_activity	28.301	3.708
25	p.W276L	c.827G>T	chr1:41285137	HGMD	63	CTACAAAGACCCTCACGCAC	no_activity	no_activity	37.48	no_activity	no_activity	no_activity	no_activity	37.945	no_activity
25	p.W276L	c.827G>T	chr1:41285137	HGMD	64	GAGAAGGGCAGCCCTACAAA	no_activity	no_activity	12.339	no_activity	no_activity	no_activity	no_activity	21.623	no_activity
25	p.W276L	c.827G>T	chr1:41285137	HGMD	65	CTCCTACGCCGACTCGCTCT	no_activity	no_activity	9.872	no_activity	no_activity	no_activity	no_activity	33.397	4.835
25	p.W276L	c.827G>T	chr1:41285137	HGMD	66	CGTGAGGGTCTTTGTAGGGC	3.853	2.074	3.95	0	0	0.032	0	9.487	8.432
25	p.W276L	c.827G>T	chr1:41285137	HGMD	67	CTTCTCCTCCTACGCCGACT	no_activity	no_activity	4.775	no_activity	no_activity	no_activity	no_activity	19.433	15.632
25	p.W276L	c.827G>T	chr1:41285137	HGMD	68	CACCGTCCCCAACCAGAGCG	no_activity	no_activity	8.781	no_activity	no_activity	no_activity	no_activity	17.351	0
25	p.W276L	c.827G>T	chr1:41285137	HGMD	69	CCCTCACGCACCGTCCCCAA	no_activity	no_activity	no_activity	no_activity	no_activity	no_activity	no_activity	no_activity	16.799
25	p.W276L	c.827G>T	chr1:41285137	HGMD	70	GCCCTACAAAGACCCTCACG	no_activity	no_activity	no_activity	no_activity	no_activity	no_activity	no_activity	6.274	no_activity
25	p.W276L	c.827G>T	chr1:41285137	HGMD	71	GCGTGAGGGTCTTTGTAGGG	2.216	6.981	no_activity	6.624	1.912	1.187	0	no_activity	no_activity
25	p.W276L	c.827G>T	chr1:41285137	HGMD	72	CGCTCTGGTTGGGGACGGTG	no_activity	no_activity	3.36	no_activity	no_activity	no_activity	no_activity	31.12	21.685
25	p.W276L	c.827G>T	chr1:41285137	HGMD	73	AGACCCTCACGCACCGTCCC	no_activity	no_activity	13.441	no_activity	no_activity	no_activity	no_activity	14.785	no_activity
25	p.W276L	c.827G>T	chr1:41285137	HGMD	74	TCGCTCTGGTTGGGGACGGT	no_activity	no_activity	no_activity	no_activity	no_activity	no_activity	no_activity	0.403	no_activity
25	p.W276L	c.827G>T	chr1:41285137	HGMD	75	CAGGGAGAAGGGCAGCCCTA	no_activity	no_activity	no_activity	no_activity	no_activity	no_activity	no_activity	10.448	no_activity
25	p.W276L	c.827G>T	chr1:41285137	HGMD	76	GGCGTAGGAGGAGAAGTCGG	no_activity	no_activity	23.265	no_activity	no_activity	no_activity	no_activity	42.689	19.055
25	p.W276L	c.827G>T	chr1:41285137	HGMD	77	GAGTCGGCGTAGGAGGAGAA	no_activity	no_activity	no_activity	no_activity	no_activity	no_activity	no_activity	20.494	no_activity
25	p.W276L	c.827G>T	chr1:41285137	HGMD	78	GCCGACTCGCTCTGGTTGGG	no_activity	no_activity	no_activity	no_activity	no_activity	no_activity	no_activity	17.555	14.77
25	p.W276L	c.827G>T	chr1:41285137	HGMD	79	CCCCAACCAGAGCGAGTCGG	no_activity	no_activity	5.555	no_activity	no_activity	no_activity	no_activity	27.367	no_activity
25	p.W276L	c.827G>T	chr1:41285137	HGMD	80	GCGTAGGAGGAGAAGTCGGA	no_activity	no_activity	no_activity	no_activity	no_activity	no_activity	no_activity	32.333	no_activity
25	p.W276L	c.827G>T	chr1:41285137	HGMD	81	TGCGTGAGGGTCTTTGTAGG	no_activity	no_activity	no_activity	no_activity	no_activity	no_activity	no_activity	15.851	no_activity
25	p.W276L	c.827G>T	chr1:41285137	HGMD	82	CCAACTCCGACTTCTCCTCC	no_activity	no_activity	no_activity	no_activity	no_activity	no_activity	no_activity	22.692	no_activity
25	p.W276L	c.827G>T	chr1:41285137	HGMD	83	GACTTCTCCTCCTACGCCGA	no_activity	no_activity	no_activity	no_activity	no_activity	no_activity	no_activity	6.274	no_activity
25	p.W276L	c.827G>T	chr1:41285137	HGMD	84	GGCAGCCCTACAAAGACCCT	no_activity	no_activity	no_activity	no_activity	no_activity	no_activity	no_activity	22.308	17.027
25	p.W276L	c.827G>T	chr1:41285137	HGMD	85	GACGGTGCGTGAGGGTCTTT	no_activity	no_activity	no_activity	no_activity	no_activity	no_activity	no_activity	14.32	14.729
25	p.W276L	c.827G>T	chr1:41285137	HGMD	86	CCGACTTCTCCTCCTACGCC	no_activity	no_activity	no_activity	no_activity	no_activity	no_activity	no_activity	8.888	no_activity
25	p.W276L	c.827G>T	chr1:41285137	HGMD	87	ACCGTCCCCAACCAGAGCGA	no_activity	no_activity	no_activity	no_activity	no_activity	no_activity	no_activity	11.296	no_activity
25	p.W276L	c.827G>T	chr1:41285137	HGMD	88	TCCTACGCCGACTCGCTCTG	no_activity	no_activity	no_activity	no_activity	no_activity	no_activity	no_activity	13.913	no_activity
25	p.W276L	c.827G>T	chr1:41285137	HGMD	89	GGACGGTGCGTGAGGGTCTT	no_activity	no_activity	3.727	no_activity	no_activity	no_activity	no_activity	27.869	18.493
25	p.W276L	c.827G>T	chr1:41285137	HGMD	90	CCCAACCAGAGCGAGTCGGC	no_activity	no_activity	no_activity	no_activity	no_activity	no_activity	no_activity	6.019	6.891
26	p.L281S	c.842T>C	chr1:41285554	ClinVar and HGMD	1	GTTACAGGCAGGACTGGTCA	56.463	50.989	29.358	45.368	36.591	31.967	26.951	41.338	31.277
26	p.L281S	c.842T>C	chr1:41285554	ClinVar and HGMD	2	AAACAGGTTACAGGCAGGAC	55.268	48.274	33.623	35.285	35.881	17.153	5.034	36.752	31.891
26	p.L281S	c.842T>C	chr1:41285554	ClinVar and HGMD	3	ACATCGACAACCATCGGCTA	54.465	49.517	29.255	43.169	39.977	40.347	3.463	35.908	29.564
26	p.L281S	c.842T>C	chr1:41285554	ClinVar and HGMD	4	TGTAATCTGGAGACACAAAC	52.662	44.336	23.5	1.269	0	0	0.052	38.699	32.789
26	p.L281S	c.842T>C	chr1:41285554	ClinVar and HGMD	5	ATGGTTGTCGATGTAATCTG	51.012	42.854	36.598	43.865	39.763	28.597	0.603	47.098	42.149
26	p.L281S	c.842T>C	chr1:41285554	ClinVar and HGMD	6	CGATGGTTGTCGATGTAATC	50.699	47.768	13.543	4.608	1.808	3.243	0	34.124	22.638
26	p.L281S	c.842T>C	chr1:41285554	ClinVar and HGMD	7	CAGATTACATCGACAACCAT	48.942	40.628	32.208	3.135	0	7.145	0	20.939	7.95
26	p.L281S	c.842T>C	chr1:41285554	ClinVar and HGMD	8	CAACCATCGGCTATGGTGAC	39.025	24.411	3.292	0.364	0	0	0	37.466	21.89
26	p.L281S	c.842T>C	chr1:41285554	ClinVar and HGMD	9	ATGTAATCTGGAGACACAAA	37.692	36.158	23.573	26.753	16.502	15.666	0	43.764	24.396
26	p.L281S	c.842T>C	chr1:41285554	ClinVar and HGMD	10	TACATCGACAACCATCGGCT	31.982	19.073	5.162	0.99	0.11	1.595	0	16.848	no_activity
26	p.L281S	c.842T>C	chr1:41285554	ClinVar and HGMD	11	CCAGATTACATCGACAACCA	29.827	16.649	7.092	0	0	0	0	no_activity	no_activity
26	p.L281S	c.842T>C	chr1:41285554	ClinVar and HGMD	12	TGGTTGTCGATGTAATCTGG	28.704	27.113	38.575	4.036	0	4.199	0	37.789	41.156
26	p.L281S	c.842T>C	chr1:41285554	ClinVar and HGMD	13	ACACAAACAGGTTACAGGCA	27.3	21.029	33.334	12.783	10.111	8.787	0.342	28.941	27.985
26	p.L281S	c.842T>C	chr1:41285554	ClinVar and HGMD	14	GTAATCTGGAGACACAAACA	no_activity	no_activity	36.88	no_activity	no_activity	no_activity	no_activity	50.771	36.706
26	p.L281S	c.842T>C	chr1:41285554	ClinVar and HGMD	15	GATGGTTGTCGATGTAATCT	26.642	26.846	15.876	25.196	19.082	9.838	15.045	43.899	51.026
26	p.L281S	c.842T>C	chr1:41285554	ClinVar and HGMD	16	GGTTACAGGCAGGACTGGTC	26.27	18.258	4.652	8.69	4.413	0	0	4.456	no_activity
26	p.L281S	c.842T>C	chr1:41285554	ClinVar and HGMD	17	TTTGTGTCTCCAGATTACAT	25.506	22.937	35.583	11.434	6.434	13.729	0	20.756	33.159
26	p.L281S	c.842T>C	chr1:41285554	ClinVar and HGMD	18	ATCGACAACCATCGGCTATG	25.012	24.108	no_activity	19.607	22.849	8.359	0.507	33.11	no_activity
26	p.L281S	c.842T>C	chr1:41285554	ClinVar and HGMD	19	CAAACAGGTTACAGGCAGGA	22.616	15.222	no_activity	0	0	0	0	27.245	no_activity
26	p.L281S	c.842T>C	chr1:41285554	ClinVar and HGMD	20	AACCATCGGCTATGGTGACA	20.048	20.382	28.301	9.845	1.966	4.46	0.119	26.793	27.386
26	p.L281S	c.842T>C	chr1:41285554	ClinVar and HGMD	21	CCGATGGTTGTCGATGTAAT	18.282	11.605	no_activity	0	0	0	0	11.751	no_activity
26	p.L281S	c.842T>C	chr1:41285554	ClinVar and HGMD	22	TCGACAACCATCGGCTATGG	18.066	14.688	29.116	0.856	0	1.43	0	23.667	31.838
26	p.L281S	c.842T>C	chr1:41285554	ClinVar and HGMD	23	AACAGGTTACAGGCAGGACT	no_activity	no_activity	38.598	no_activity	no_activity	no_activity	no_activity	37.178	no_activity
26	p.L281S	c.842T>C	chr1:41285554	ClinVar and HGMD	24	AGATTACATCGACAACCATC	15.269	14.589	20.347	12.99	7.556	9.032	0.689	45.632	30.58
26	p.L281S	c.842T>C	chr1:41285554	ClinVar and HGMD	25	GTCCTGCCTGTAACCTGTTT	14.624	6.4	no_activity	1.878	0	0	0	21.09	no_activity
26	p.L281S	c.842T>C	chr1:41285554	ClinVar and HGMD	26	TCACCATAGCCGATGGTTGT	14.618	10.62	10.203	0	0	0	0	26.86	33.401
26	p.L281S	c.842T>C	chr1:41285554	ClinVar and HGMD	27	ACCATAGCCGATGGTTGTCG	no_activity	no_activity	no_activity	no_activity	no_activity	no_activity	no_activity	7.887	no_activity
26	p.L281S	c.842T>C	chr1:41285554	ClinVar and HGMD	28	TGACCAGTCCTGCCTGTAAC	no_activity	no_activity	no_activity	no_activity	no_activity	no_activity	no_activity	18.632	no_activity
26	p.L281S	c.842T>C	chr1:41285554	ClinVar and HGMD	29	AGTCCTGCCTGTAACCTGTT	no_activity	no_activity	14.593	no_activity	no_activity	no_activity	no_activity	46.901	48.634
26	p.L281S	c.842T>C	chr1:41285554	ClinVar and HGMD	30	TTGTCACCATAGCCGATGGT	no_activity	no_activity	35.715	no_activity	no_activity	no_activity	no_activity	35.167	13.147
26	p.L281S	c.842T>C	chr1:41285554	ClinVar and HGMD	31	GGTTGTCGATGTAATCTGGA	no_activity	no_activity	no_activity	no_activity	no_activity	no_activity	no_activity	43.581	no_activity
26	p.L281S	c.842T>C	chr1:41285554	ClinVar and HGMD	32	GTGTCTCCAGATTACATCGA	no_activity	no_activity	20.359	no_activity	no_activity	no_activity	no_activity	29.742	no_activity
26	p.L281S	c.842T>C	chr1:41285554	ClinVar and HGMD	33	GATGTAATCTGGAGACACAA	no_activity	no_activity	no_activity	no_activity	no_activity	no_activity	no_activity	10.906	33.887
26	p.L281S	c.842T>C	chr1:41285554	ClinVar and HGMD	34	CATCGACAACCATCGGCTAT	no_activity	no_activity	6.045	no_activity	no_activity	no_activity	no_activity	32.433	22.265
26	p.L281S	c.842T>C	chr1:41285554	ClinVar and HGMD	35	TGTCACCATAGCCGATGGTT	no_activity	no_activity	no_activity	no_activity	no_activity	no_activity	no_activity	11.469	no_activity
26	p.L281S	c.842T>C	chr1:41285554	ClinVar and HGMD	36	CGACAACCATCGGCTATGGT	no_activity	no_activity	no_activity	no_activity	no_activity	no_activity	no_activity	13.533	no_activity
26	p.L281S	c.842T>C	chr1:41285554	ClinVar and HGMD	37	ACAACCATCGGCTATGGTGA	no_activity	no_activity	no_activity	no_activity	no_activity	no_activity	no_activity	29.262	34.021
26	p.L281S	c.842T>C	chr1:41285554	ClinVar and HGMD	38	CCATAGCCGATGGTTGTCGA	no_activity	no_activity	6.13	no_activity	no_activity	no_activity	no_activity	49.411	12.084
26	p.L281S	c.842T>C	chr1:41285554	ClinVar and HGMD	39	TGTTTGTGTCTCCAGATTAC	no_activity	no_activity	no_activity	no_activity	no_activity	no_activity	no_activity	6.312	no_activity
26	p.L281S	c.842T>C	chr1:41285554	ClinVar and HGMD	40	GACCAGTCCTGCCTGTAACC	no_activity	no_activity	11.103	no_activity	no_activity	no_activity	no_activity	39.706	15.453
26	p.L281S	c.842T>C	chr1:41285554	ClinVar and HGMD	41	TAGCCGATGGTTGTCGATGT	no_activity	no_activity	no_activity	no_activity	no_activity	no_activity	no_activity	10.825	no_activity
26	p.L281S	c.842T>C	chr1:41285554	ClinVar and HGMD	42	TTGTCGATGTAATCTGGAGA	no_activity	no_activity	no_activity	no_activity	no_activity	no_activity	no_activity	6.273	no_activity
26	p.L281S	c.842T>C	chr1:41285554	ClinVar and HGMD	43	CATAGCCGATGGTTGTCGAT	no_activity	no_activity	no_activity	no_activity	no_activity	no_activity	no_activity	9.699	no_activity
26	p.L281S	c.842T>C	chr1:41285554	ClinVar and HGMD	44	GTCGATGTAATCTGGAGACA	no_activity	no_activity	no_activity	no_activity	no_activity	no_activity	no_activity	16.375	no_activity
26	p.L281S	c.842T>C	chr1:41285554	ClinVar and HGMD	45	ACAAACAGGTTACAGGCAGG	no_activity	no_activity	no_activity	no_activity	no_activity	no_activity	no_activity	6.744	no_activity
26	p.L281S	c.842T>C	chr1:41285554	ClinVar and HGMD	46	CTCCAGATTACATCGACAAC	no_activity	no_activity	1.233	no_activity	no_activity	no_activity	no_activity	3.204	no_activity
26	p.L281S	c.842T>C	chr1:41285554	ClinVar and HGMD	47	TTGTGTCTCCAGATTACATC	no_activity	no_activity	no_activity	no_activity	no_activity	no_activity	no_activity	3.009	no_activity
26	p.L281S	c.842T>C	chr1:41285554	ClinVar and HGMD	48	CTGTTTGTGTCTCCAGATTA	no_activity	no_activity	3.651	no_activity	no_activity	no_activity	no_activity	8.796	no_activity
26	p.L281S	c.842T>C	chr1:41285554	ClinVar and HGMD	49	TCCTGCCTGTAACCTGTTTG	no_activity	no_activity	7.246	no_activity	no_activity	no_activity	no_activity	31.476	6.46
26	p.L281S	c.842T>C	chr1:41285554	ClinVar and HGMD	50	CACCATAGCCGATGGTTGTC	no_activity	no_activity	no_activity	no_activity	no_activity	no_activity	no_activity	36.711	9.205
26	p.L281S	c.842T>C	chr1:41285554	ClinVar and HGMD	51	AGGTTACAGGCAGGACTGGT	no_activity	no_activity	no_activity	no_activity	no_activity	no_activity	no_activity	15.905	10.426
26	p.L281S	c.842T>C	chr1:41285554	ClinVar and HGMD	52	TTACATCGACAACCATCGGC	no_activity	no_activity	no_activity	no_activity	no_activity	no_activity	no_activity	8.075	no_activity
26	p.L281S	c.842T>C	chr1:41285554	ClinVar and HGMD	53	TCCAGATTACATCGACAACC	no_activity	no_activity	no_activity	no_activity	no_activity	no_activity	no_activity	5.46	no_activity
26	p.L281S	c.842T>C	chr1:41285554	ClinVar and HGMD	54	CGATGTAATCTGGAGACACA	no_activity	no_activity	no_activity	no_activity	no_activity	no_activity	no_activity	1.374	no_activity
26	p.L281S	c.842T>C	chr1:41285554	ClinVar and HGMD	55	CACAAACAGGTTACAGGCAG	no_activity	no_activity	no_activity	no_activity	no_activity	no_activity	no_activity	3.032	no_activity
27	p.G285C	c.853G>T	chr1:41285565	ClinVar and HGMD	1	ACATTGACAACCATCTGCTA	54.715	49.26	30.582	45.204	35.658	42.521	4.248	38.401	27.594
27	p.G285C	c.853G>T	chr1:41285565	ClinVar and HGMD	2	TGTCTTGTCACCATAGCAGA	54.178	49.146	32.767	20.885	13.433	16.401	0	32.954	23.112
27	p.G285C	c.853G>T	chr1:41285565	ClinVar and HGMD	3	AGATGGTTGTCAATGTAATC	54.151	50.409	22.841	39.944	35.551	33.766	3.087	39.224	31.643
27	p.G285C	c.853G>T	chr1:41285565	ClinVar and HGMD	4	ATGGTTGTCAATGTAATCTG	50.068	42.977	38.488	43.601	38.973	33.59	1.065	47.697	46.534
27	p.G285C	c.853G>T	chr1:41285565	ClinVar and HGMD	5	TACATTGACAACCATCTGCT	40.288	23.201	7.811	0.939	0	2.291	0	32.879	no_activity
27	p.G285C	c.853G>T	chr1:41285565	ClinVar and HGMD	6	TGTGCGGTGTCTTGTCACCA	36.327	32.634	21.222	24.263	18.382	23.858	0	14.88	no_activity
27	p.G285C	c.853G>T	chr1:41285565	ClinVar and HGMD	7	GCGGTGTCTTGTCACCATAG	34.773	33.101	20.321	28.046	20.482	24.36	0.921	29.308	no_activity
27	p.G285C	c.853G>T	chr1:41285565	ClinVar and HGMD	8	CAACCATCTGCTATGGTGAC	34.187	20.924	3.149	0	0	0.304	0	35.086	20.294
27	p.G285C	c.853G>T	chr1:41285565	ClinVar and HGMD	9	GTGTCTTGTCACCATAGCAG	31.111	23.447	12.271	10.911	8.512	1.75	0	24.79	no_activity
27	p.G285C	c.853G>T	chr1:41285565	ClinVar and HGMD	10	GATGGTTGTCAATGTAATCT	26.503	24.591	15.729	23.328	17.208	9.671	12.825	43.095	48.705
27	p.G285C	c.853G>T	chr1:41285565	ClinVar and HGMD	11	ATTGACAACCATCTGCTATG	26.149	24.455	no_activity	25.525	31.272	17.337	1.271	38.03	no_activity
27	p.G285C	c.853G>T	chr1:41285565	ClinVar and HGMD	12	TGGTTGTCAATGTAATCTGG	25.131	25.294	39.741	2.008	0	3.149	0	35.543	36.723
27	p.G285C	c.853G>T	chr1:41285565	ClinVar and HGMD	13	CAGATGGTTGTCAATGTAAT	21.081	9.679	no_activity	0	0	0	0	12.264	no_activity
27	p.G285C	c.853G>T	chr1:41285565	ClinVar and HGMD	14	TTGACAACCATCTGCTATGG	19.95	14.273	31.438	0.331	0.179	0.798	0	24.823	32.429
27	p.G285C	c.853G>T	chr1:41285565	ClinVar and HGMD	15	AACCATCTGCTATGGTGACA	17.731	18.94	27.948	3.464	0.688	2.609	0	28.658	28.256
27	p.G285C	c.853G>T	chr1:41285565	ClinVar and HGMD	16	AGATTACATTGACAACCATC	no_activity	no_activity	17.485	no_activity	no_activity	no_activity	no_activity	45.411	33.662
27	p.G285C	c.853G>T	chr1:41285565	ClinVar and HGMD	17	TTGTCACCATAGCAGATGGT	no_activity	no_activity	43.837	no_activity	no_activity	no_activity	no_activity	36.171	17.022
27	p.G285C	c.853G>T	chr1:41285565	ClinVar and HGMD	18	GTCTTGTCACCATAGCAGAT	no_activity	no_activity	28.415	no_activity	no_activity	no_activity	no_activity	50.983	31.501
27	p.G285C	c.853G>T	chr1:41285565	ClinVar and HGMD	19	ACCATAGCAGATGGTTGTCA	no_activity	no_activity	no_activity	no_activity	no_activity	no_activity	no_activity	14.561	no_activity
27	p.G285C	c.853G>T	chr1:41285565	ClinVar and HGMD	20	CTGCTATGGTGACAAGACAC	no_activity	no_activity	14.081	no_activity	no_activity	no_activity	no_activity	32.489	33.356
27	p.G285C	c.853G>T	chr1:41285565	ClinVar and HGMD	21	GTGCGGTGTCTTGTCACCAT	no_activity	no_activity	8.126	no_activity	no_activity	no_activity	no_activity	31.703	23.485
27	p.G285C	c.853G>T	chr1:41285565	ClinVar and HGMD	22	CGGTGTCTTGTCACCATAGC	3.766	3.192	1.107	0.377	0	0	0	16.765	25.827
27	p.G285C	c.853G>T	chr1:41285565	ClinVar and HGMD	23	GCTATGGTGACAAGACACCG	no_activity	no_activity	no_activity	no_activity	no_activity	no_activity	no_activity	31.24	no_activity
27	p.G285C	c.853G>T	chr1:41285565	ClinVar and HGMD	24	GGTTGTCAATGTAATCTGGA	no_activity	no_activity	no_activity	no_activity	no_activity	no_activity	no_activity	43.191	no_activity
27	p.G285C	c.853G>T	chr1:41285565	ClinVar and HGMD	25	CCATAGCAGATGGTTGTCAA	no_activity	no_activity	8.047	no_activity	no_activity	no_activity	no_activity	48.833	14.287
27	p.G285C	c.853G>T	chr1:41285565	ClinVar and HGMD	26	CAGATTACATTGACAACCAT	2.307	1.475	no_activity	0	0	0	0	no_activity	no_activity
27	p.G285C	c.853G>T	chr1:41285565	ClinVar and HGMD	27	ACAACCATCTGCTATGGTGA	no_activity	no_activity	no_activity	no_activity	no_activity	no_activity	no_activity	29.463	34.716
27	p.G285C	c.853G>T	chr1:41285565	ClinVar and HGMD	28	GGTGTCTTGTCACCATAGCA	no_activity	no_activity	no_activity	no_activity	no_activity	no_activity	no_activity	41.286	25.821
27	p.G285C	c.853G>T	chr1:41285565	ClinVar and HGMD	29	GTGTGCGGTGTCTTGTCACC	no_activity	no_activity	no_activity	no_activity	no_activity	no_activity	no_activity	18.78	17.128
27	p.G285C	c.853G>T	chr1:41285565	ClinVar and HGMD	30	CATTGACAACCATCTGCTAT	no_activity	no_activity	3.213	no_activity	no_activity	no_activity	no_activity	32.841	21.796
27	p.G285C	c.853G>T	chr1:41285565	ClinVar and HGMD	31	TGACAACCATCTGCTATGGT	no_activity	no_activity	no_activity	no_activity	no_activity	no_activity	no_activity	16.402	no_activity
27	p.G285C	c.853G>T	chr1:41285565	ClinVar and HGMD	32	TCACCATAGCAGATGGTTGT	no_activity	no_activity	no_activity	no_activity	no_activity	no_activity	no_activity	5.281	no_activity
27	p.G285C	c.853G>T	chr1:41285565	ClinVar and HGMD	33	ACCATCTGCTATGGTGACAA	no_activity	no_activity	no_activity	no_activity	no_activity	no_activity	no_activity	32.174	no_activity
27	p.G285C	c.853G>T	chr1:41285565	ClinVar and HGMD	34	CATAGCAGATGGTTGTCAAT	no_activity	no_activity	no_activity	no_activity	no_activity	no_activity	no_activity	7.588	no_activity
27	p.G285C	c.853G>T	chr1:41285565	ClinVar and HGMD	35	CTCCAGATTACATTGACAAC	no_activity	no_activity	0.778	no_activity	no_activity	no_activity	no_activity	4.338	no_activity
27	p.G285C	c.853G>T	chr1:41285565	ClinVar and HGMD	36	CATCTGCTATGGTGACAAGA	no_activity	no_activity	no_activity	no_activity	no_activity	no_activity	no_activity	14.25	no_activity
27	p.G285C	c.853G>T	chr1:41285565	ClinVar and HGMD	37	TCTTGTCACCATAGCAGATG	no_activity	no_activity	no_activity	no_activity	no_activity	no_activity	no_activity	24.285	no_activity
27	p.G285C	c.853G>T	chr1:41285565	ClinVar and HGMD	38	TAGCAGATGGTTGTCAATGT	no_activity	no_activity	no_activity	no_activity	no_activity	no_activity	no_activity	15.227	no_activity
27	p.G285C	c.853G>T	chr1:41285565	ClinVar and HGMD	39	TGCGGTGTCTTGTCACCATA	no_activity	no_activity	no_activity	no_activity	no_activity	no_activity	no_activity	12.008	17.746
27	p.G285C	c.853G>T	chr1:41285565	ClinVar and HGMD	40	TATGGTGACAAGACACCGCA	no_activity	no_activity	no_activity	no_activity	no_activity	no_activity	no_activity	16.64	no_activity
27	p.G285C	c.853G>T	chr1:41285565	ClinVar and HGMD	41	TTACATTGACAACCATCTGC	no_activity	no_activity	no_activity	no_activity	no_activity	no_activity	no_activity	10.046	no_activity
27	p.G285C	c.853G>T	chr1:41285565	ClinVar and HGMD	42	CACCATAGCAGATGGTTGTC	no_activity	no_activity	no_activity	no_activity	no_activity	no_activity	no_activity	27.761	no_activity
28	p.G285S	c.853G>A	chr1:41285565	ClinVar and HGMD	1	ACATTGACAACCATCAGCTA	56.99	50.683	35.069	45.646	29.567	41.546	5.907	38.591	31.805
28	p.G285S	c.853G>A	chr1:41285565	ClinVar and HGMD	2	TGTCTTGTCACCATAGCTGA	55.192	47.319	31.073	15.638	5.396	7.754	0	32.382	23.057
28	p.G285S	c.853G>A	chr1:41285565	ClinVar and HGMD	3	GACACAAACAGGTTACAGGC	53.743	50.928	37.802	52.767	43.801	36.941	25.359	49.876	39.351
28	p.G285S	c.853G>A	chr1:41285565	ClinVar and HGMD	4	TGATGGTTGTCAATGTAATC	52.417	47.51	15.224	9.434	3.724	11.706	0	34.284	23.453
28	p.G285S	c.853G>A	chr1:41285565	ClinVar and HGMD	5	ATGGTTGTCAATGTAATCTG	49.211	42.301	38.121	43.483	37.929	34.862	0.455	47.786	46.206
28	p.G285S	c.853G>A	chr1:41285565	ClinVar and HGMD	6	TACATTGACAACCATCAGCT	38.219	22.551	6.207	0.91	0	2.366	0	29.466	no_activity
28	p.G285S	c.853G>A	chr1:41285565	ClinVar and HGMD	7	CAACCATCAGCTATGGTGAC	35.78	23.542	4.453	0.882	0	1.024	0	37.885	22.653
28	p.G285S	c.853G>A	chr1:41285565	ClinVar and HGMD	8	TGTGCGGTGTCTTGTCACCA	31.725	28.139	11.191	19.156	19.198	20.984	0.04	17.658	no_activity
28	p.G285S	c.853G>A	chr1:41285565	ClinVar and HGMD	9	GTGTCTTGTCACCATAGCTG	30.352	23.13	10.515	11.224	7.592	2.213	0	21.876	no_activity
28	p.G285S	c.853G>A	chr1:41285565	ClinVar and HGMD	10	AGACACAAACAGGTTACAGG	28.875	31.84	7.459	34.744	28.381	28.366	6.788	33.646	14.229
28	p.G285S	c.853G>A	chr1:41285565	ClinVar and HGMD	11	ATTGACAACCATCAGCTATG	27.958	25.899	no_activity	24.422	30.977	18.709	0.777	37.847	no_activity
28	p.G285S	c.853G>A	chr1:41285565	ClinVar and HGMD	12	GATGGTTGTCAATGTAATCT	26.799	25.177	16.854	24.118	16.811	10.002	11.136	43.667	49.723
28	p.G285S	c.853G>A	chr1:41285565	ClinVar and HGMD	13	GGAGACACAAACAGGTTACA	25.203	25.161	18.447	18.712	4.344	7.865	0.043	36.175	22.856
28	p.G285S	c.853G>A	chr1:41285565	ClinVar and HGMD	14	TGGTTGTCAATGTAATCTGG	24.536	25.708	38.449	2.266	0	3.198	0	37.711	37.513
28	p.G285S	c.853G>A	chr1:41285565	ClinVar and HGMD	15	TTGACAACCATCAGCTATGG	19.65	11.551	27.753	0.059	0	0	0	22.014	30.328
28	p.G285S	c.853G>A	chr1:41285565	ClinVar and HGMD	16	AACCATCAGCTATGGTGACA	19.116	20.471	30.624	6.443	0.448	3.489	0	28.781	28.276
28	p.G285S	c.853G>A	chr1:41285565	ClinVar and HGMD	17	CAGATTACATTGACAACCAT	15.491	6.432	0.618	0	0	0	0	4.38	no_activity
28	p.G285S	c.853G>A	chr1:41285565	ClinVar and HGMD	18	CTGATGGTTGTCAATGTAAT	14.575	6.671	no_activity	0	0	0	0	9.238	no_activity
28	p.G285S	c.853G>A	chr1:41285565	ClinVar and HGMD	19	GCGGTGTCTTGTCACCATAG	no_activity	no_activity	no_activity	no_activity	no_activity	no_activity	no_activity	10.486	no_activity
28	p.G285S	c.853G>A	chr1:41285565	ClinVar and HGMD	20	AGATTACATTGACAACCATC	no_activity	no_activity	19.062	no_activity	no_activity	no_activity	no_activity	46.889	35.491
28	p.G285S	c.853G>A	chr1:41285565	ClinVar and HGMD	21	GTCTTGTCACCATAGCTGAT	no_activity	no_activity	33.507	no_activity	no_activity	no_activity	no_activity	52.322	31.682
28	p.G285S	c.853G>A	chr1:41285565	ClinVar and HGMD	22	TTGTCACCATAGCTGATGGT	no_activity	no_activity	43.485	no_activity	no_activity	no_activity	no_activity	36.375	17.585
28	p.G285S	c.853G>A	chr1:41285565	ClinVar and HGMD	23	ACCATAGCTGATGGTTGTCA	no_activity	no_activity	no_activity	no_activity	no_activity	no_activity	no_activity	13.455	no_activity
28	p.G285S	c.853G>A	chr1:41285565	ClinVar and HGMD	24	CAGCTATGGTGACAAGACAC	no_activity	no_activity	16.346	no_activity	no_activity	no_activity	no_activity	32.146	35.137
28	p.G285S	c.853G>A	chr1:41285565	ClinVar and HGMD	25	GTGCGGTGTCTTGTCACCAT	no_activity	no_activity	10.957	no_activity	no_activity	no_activity	no_activity	32.855	25.678
28	p.G285S	c.853G>A	chr1:41285565	ClinVar and HGMD	26	CGGTGTCTTGTCACCATAGC	4.687	2.712	1.076	0.684	0	0	0	16.452	22.883
28	p.G285S	c.853G>A	chr1:41285565	ClinVar and HGMD	27	GCTATGGTGACAAGACACCG	no_activity	no_activity	no_activity	no_activity	no_activity	no_activity	no_activity	31.223	no_activity
28	p.G285S	c.853G>A	chr1:41285565	ClinVar and HGMD	28	CCTGTAACCTGTTTGTGTCT	no_activity	no_activity	no_activity	no_activity	no_activity	no_activity	no_activity	no_activity	1.257
28	p.G285S	c.853G>A	chr1:41285565	ClinVar and HGMD	29	GGTTGTCAATGTAATCTGGA	no_activity	no_activity	no_activity	no_activity	no_activity	no_activity	no_activity	43.069	no_activity
28	p.G285S	c.853G>A	chr1:41285565	ClinVar and HGMD	30	ACAACCATCAGCTATGGTGA	no_activity	no_activity	no_activity	no_activity	no_activity	no_activity	no_activity	30.779	36.907
28	p.G285S	c.853G>A	chr1:41285565	ClinVar and HGMD	31	CATTGACAACCATCAGCTAT	no_activity	no_activity	5.122	no_activity	no_activity	no_activity	no_activity	35.887	23.279
28	p.G285S	c.853G>A	chr1:41285565	ClinVar and HGMD	32	GTGTGCGGTGTCTTGTCACC	no_activity	no_activity	no_activity	no_activity	no_activity	no_activity	no_activity	16.459	11.641
28	p.G285S	c.853G>A	chr1:41285565	ClinVar and HGMD	33	GAGACACAAACAGGTTACAG	no_activity	no_activity	no_activity	no_activity	no_activity	no_activity	no_activity	17.945	30.579
28	p.G285S	c.853G>A	chr1:41285565	ClinVar and HGMD	34	CCATAGCTGATGGTTGTCAA	no_activity	no_activity	6.673	no_activity	no_activity	no_activity	no_activity	48.891	15.387
28	p.G285S	c.853G>A	chr1:41285565	ClinVar and HGMD	35	ACCATCAGCTATGGTGACAA	no_activity	no_activity	no_activity	no_activity	no_activity	no_activity	no_activity	34.442	no_activity
28	p.G285S	c.853G>A	chr1:41285565	ClinVar and HGMD	36	CTCCAGATTACATTGACAAC	no_activity	no_activity	3.402	no_activity	no_activity	no_activity	no_activity	1.965	no_activity
28	p.G285S	c.853G>A	chr1:41285565	ClinVar and HGMD	37	TGACAACCATCAGCTATGGT	no_activity	no_activity	no_activity	no_activity	no_activity	no_activity	no_activity	14.896	no_activity
28	p.G285S	c.853G>A	chr1:41285565	ClinVar and HGMD	38	TCACCATAGCTGATGGTTGT	no_activity	no_activity	no_activity	no_activity	no_activity	no_activity	no_activity	3.372	no_activity
28	p.G285S	c.853G>A	chr1:41285565	ClinVar and HGMD	39	TAGCTGATGGTTGTCAATGT	no_activity	no_activity	no_activity	no_activity	no_activity	no_activity	no_activity	13.207	no_activity
28	p.G285S	c.853G>A	chr1:41285565	ClinVar and HGMD	40	CATAGCTGATGGTTGTCAAT	no_activity	no_activity	no_activity	no_activity	no_activity	no_activity	no_activity	7.784	no_activity
28	p.G285S	c.853G>A	chr1:41285565	ClinVar and HGMD	41	TCTTGTCACCATAGCTGATG	no_activity	no_activity	no_activity	no_activity	no_activity	no_activity	no_activity	22.52	no_activity
28	p.G285S	c.853G>A	chr1:41285565	ClinVar and HGMD	42	TGCGGTGTCTTGTCACCATA	no_activity	no_activity	no_activity	no_activity	no_activity	no_activity	no_activity	13.12	no_activity
28	p.G285S	c.853G>A	chr1:41285565	ClinVar and HGMD	43	CATCAGCTATGGTGACAAGA	no_activity	no_activity	no_activity	no_activity	no_activity	no_activity	no_activity	14.939	no_activity
28	p.G285S	c.853G>A	chr1:41285565	ClinVar and HGMD	44	TATGGTGACAAGACACCGCA	no_activity	no_activity	no_activity	no_activity	no_activity	no_activity	no_activity	16.621	no_activity
28	p.G285S	c.853G>A	chr1:41285565	ClinVar and HGMD	45	GGTGTCTTGTCACCATAGCT	no_activity	no_activity	no_activity	no_activity	no_activity	no_activity	no_activity	33.98	18.538
28	p.G285S	c.853G>A	chr1:41285565	ClinVar and HGMD	46	CACCATAGCTGATGGTTGTC	no_activity	no_activity	no_activity	no_activity	no_activity	no_activity	no_activity	28.905	no_activity
28	p.G285S	c.853G>A	chr1:41285565	ClinVar and HGMD	47	TTACATTGACAACCATCAGC	no_activity	no_activity	no_activity	no_activity	no_activity	no_activity	no_activity	5.368	no_activity
29	p.Y286C	c.857A>G	chr1:41285569	HGMD	1	TGGAGACACAAACAGGTTAC	59.156	53.751	40.921	6.213	0	31.284	0	28.388	18.005
29	p.Y286C	c.857A>G	chr1:41285569	HGMD	2	GTGACAAGACACCGCACACA	58.54	54.733	42.69	49.578	49.61	52.21	45.39	39.771	28.319
29	p.Y286C	c.857A>G	chr1:41285569	HGMD	3	ACATTGACAACCATCGGCTG	53.663	47.418	28.636	44.395	31.955	38.344	4.371	37	27.711
29	p.Y286C	c.857A>G	chr1:41285569	HGMD	4	TGTCTTGTCACCACAGCCGA	52.87	46.912	28.548	9.709	5.655	6.386	0	31.523	23.327
29	p.Y286C	c.857A>G	chr1:41285569	HGMD	5	CGATGGTTGTCAATGTAATC	51.48	48.253	14.028	8.218	2.64	8.527	0	32.313	25.096
29	p.Y286C	c.857A>G	chr1:41285569	HGMD	6	CAGATTACATTGACAACCAT	44.566	34.341	24.664	0.731	0	3.183	0	14.857	2.586
29	p.Y286C	c.857A>G	chr1:41285569	HGMD	7	CAACCATCGGCTGTGGTGAC	38.76	24.342	6.189	0.378	0	0	0	39.347	25.987
29	p.Y286C	c.857A>G	chr1:41285569	HGMD	8	GGTGACAAGACACCGCACAC	36.399	29.624	10.145	18.212	3.169	7.487	0	39.379	no_activity
29	p.Y286C	c.857A>G	chr1:41285569	HGMD	9	TGTGCGGTGTCTTGTCACCA	34.545	32.096	24.34	21.332	20.354	20.142	0	26.305	no_activity
29	p.Y286C	c.857A>G	chr1:41285569	HGMD	10	TACATTGACAACCATCGGCT	29.7	15.589	no_activity	1.313	0	1.138	0	23.39	no_activity
29	p.Y286C	c.857A>G	chr1:41285569	HGMD	11	CTGGAGACACAAACAGGTTA	29.389	19.487	8.902	0.688	0	0	0	35.691	17.254
29	p.Y286C	c.857A>G	chr1:41285569	HGMD	12	ATTGACAACCATCGGCTGTG	28.035	25.881	no_activity	21.63	27.129	13.873	1.197	31.111	no_activity
29	p.Y286C	c.857A>G	chr1:41285569	HGMD	13	GTGTCTTGTCACCACAGCCG	26.21	21.896	9.251	8.444	9.212	3.925	0	21.624	no_activity
29	p.Y286C	c.857A>G	chr1:41285569	HGMD	14	TGACAAGACACCGCACACAT	22.154	21.899	25.317	1.711	0	3.967	0	39.54	31.091
29	p.Y286C	c.857A>G	chr1:41285569	HGMD	15	TTGACAACCATCGGCTGTGG	18.827	10.857	27.751	0	0	0.058	0	22.646	30.943
29	p.Y286C	c.857A>G	chr1:41285569	HGMD	16	AACCATCGGCTGTGGTGACA	18.766	17.721	30.38	6.624	0.293	2.078	0	25.004	27.736
29	p.Y286C	c.857A>G	chr1:41285569	HGMD	17	ATTACATTGACAACCATCGG	no_activity	no_activity	no_activity	no_activity	no_activity	no_activity	no_activity	15.162	no_activity
29	p.Y286C	c.857A>G	chr1:41285569	HGMD	18	CCGATGGTTGTCAATGTAAT	14.47	7.879	no_activity	0	0	0	0	8.133	no_activity
29	p.Y286C	c.857A>G	chr1:41285569	HGMD	19	AGATTACATTGACAACCATC	13.093	10.647	15.438	6.446	3.394	3.996	0	44.019	35.41
29	p.Y286C	c.857A>G	chr1:41285569	HGMD	20	GTGCGGTGTCTTGTCACCAC	no_activity	no_activity	18.727	no_activity	no_activity	no_activity	no_activity	23.634	11.752
29	p.Y286C	c.857A>G	chr1:41285569	HGMD	21	TTGTCACCACAGCCGATGGT	no_activity	no_activity	41.976	no_activity	no_activity	no_activity	no_activity	32.714	16.354
29	p.Y286C	c.857A>G	chr1:41285569	HGMD	22	TGTAACCTGTTTGTGTCTCC	7.318	3.984	3.009	0	0	0	0.307	21.548	21.357
29	p.Y286C	c.857A>G	chr1:41285569	HGMD	23	CGGCTGTGGTGACAAGACAC	no_activity	no_activity	15.234	no_activity	no_activity	no_activity	no_activity	30.547	32.283
29	p.Y286C	c.857A>G	chr1:41285569	HGMD	24	GTCTTGTCACCACAGCCGAT	no_activity	no_activity	18.052	no_activity	no_activity	no_activity	no_activity	47.779	18.963
29	p.Y286C	c.857A>G	chr1:41285569	HGMD	25	CTGTAACCTGTTTGTGTCTC	5.74	2.309	0	1.198	0	0	0	7.186	no_activity
29	p.Y286C	c.857A>G	chr1:41285569	HGMD	26	ACCACAGCCGATGGTTGTCA	no_activity	no_activity	no_activity	no_activity	no_activity	no_activity	no_activity	9.241	no_activity
29	p.Y286C	c.857A>G	chr1:41285569	HGMD	27	CGGTGTCTTGTCACCACAGC	2.698	1.75	2.142	0.58	0	0	0	7.852	14.238
29	p.Y286C	c.857A>G	chr1:41285569	HGMD	28	GCTGTGGTGACAAGACACCG	no_activity	no_activity	no_activity	no_activity	no_activity	no_activity	no_activity	27.944	no_activity
29	p.Y286C	c.857A>G	chr1:41285569	HGMD	29	CCACAGCCGATGGTTGTCAA	no_activity	no_activity	5.334	no_activity	no_activity	no_activity	no_activity	49.12	15.318
29	p.Y286C	c.857A>G	chr1:41285569	HGMD	30	CATTGACAACCATCGGCTGT	no_activity	no_activity	6.24	no_activity	no_activity	no_activity	no_activity	34.83	22.066
29	p.Y286C	c.857A>G	chr1:41285569	HGMD	31	GTGTGCGGTGTCTTGTCACC	no_activity	no_activity	no_activity	no_activity	no_activity	no_activity	no_activity	6.446	8.604
29	p.Y286C	c.857A>G	chr1:41285569	HGMD	32	ACCATCGGCTGTGGTGACAA	no_activity	no_activity	no_activity	no_activity	no_activity	no_activity	no_activity	34.946	no_activity
29	p.Y286C	c.857A>G	chr1:41285569	HGMD	33	TCACCACAGCCGATGGTTGT	no_activity	no_activity	no_activity	no_activity	no_activity	no_activity	no_activity	4.577	no_activity
29	p.Y286C	c.857A>G	chr1:41285569	HGMD	34	CAGCCGATGGTTGTCAATGT	no_activity	no_activity	no_activity	no_activity	no_activity	no_activity	no_activity	12.219	no_activity
29	p.Y286C	c.857A>G	chr1:41285569	HGMD	35	CCATGTGTGCGGTGTCTTGT	no_activity	no_activity	no_activity	no_activity	no_activity	no_activity	no_activity	2.357	no_activity
29	p.Y286C	c.857A>G	chr1:41285569	HGMD	36	TGACAACCATCGGCTGTGGT	no_activity	no_activity	no_activity	no_activity	no_activity	no_activity	no_activity	10.494	no_activity
29	p.Y286C	c.857A>G	chr1:41285569	HGMD	37	GATTACATTGACAACCATCG	no_activity	no_activity	no_activity	no_activity	no_activity	no_activity	no_activity	20.778	no_activity
29	p.Y286C	c.857A>G	chr1:41285569	HGMD	38	CACAGCCGATGGTTGTCAAT	no_activity	no_activity	no_activity	no_activity	no_activity	no_activity	no_activity	8.75	no_activity
29	p.Y286C	c.857A>G	chr1:41285569	HGMD	39	ACAACCATCGGCTGTGGTGA	no_activity	no_activity	no_activity	no_activity	no_activity	no_activity	no_activity	29.804	30.771
29	p.Y286C	c.857A>G	chr1:41285569	HGMD	40	TGTGGTGACAAGACACCGCA	no_activity	no_activity	no_activity	no_activity	no_activity	no_activity	no_activity	18.51	no_activity
29	p.Y286C	c.857A>G	chr1:41285569	HGMD	41	TCTTGTCACCACAGCCGATG	no_activity	no_activity	no_activity	no_activity	no_activity	no_activity	no_activity	21.675	no_activity
29	p.Y286C	c.857A>G	chr1:41285569	HGMD	42	TGTGTGCGGTGTCTTGTCAC	no_activity	no_activity	no_activity	no_activity	no_activity	no_activity	no_activity	22.1	no_activity
29	p.Y286C	c.857A>G	chr1:41285569	HGMD	43	TTACATTGACAACCATCGGC	no_activity	no_activity	1.423	no_activity	no_activity	no_activity	no_activity	31.347	18.253
29	p.Y286C	c.857A>G	chr1:41285569	HGMD	44	CATCGGCTGTGGTGACAAGA	no_activity	no_activity	no_activity	no_activity	no_activity	no_activity	no_activity	13.641	no_activity
29	p.Y286C	c.857A>G	chr1:41285569	HGMD	45	CACCACAGCCGATGGTTGTC	no_activity	no_activity	no_activity	no_activity	no_activity	no_activity	no_activity	27.407	no_activity
29	p.Y286C	c.857A>G	chr1:41285569	HGMD	46	GGTGTCTTGTCACCACAGCC	no_activity	no_activity	no_activity	no_activity	no_activity	no_activity	no_activity	34.73	12.881
29	p.Y286C	c.857A>G	chr1:41285569	HGMD	47	TGGTGACAAGACACCGCACA	no_activity	no_activity	no_activity	no_activity	no_activity	no_activity	no_activity	32.039	no_activity
30	p.G287S	c.859G>A	chr1:41285571	ClinVar	1	GTGACAAGACACCGCACACA	58.127	55.022	41.979	50.955	49.043	50.06	41.383	39.684	28.696
30	p.G287S	c.859G>A	chr1:41285571	ClinVar	2	TGTCTTGTCACTATAGCCGA	53.903	47.056	28.671	14.983	15.774	7.943	0	32.187	23.586
30	p.G287S	c.859G>A	chr1:41285571	ClinVar	3	CAACCATCGGCTATAGTGAC	40.616	24.515	3.936	1.004	0	0.245	0	40.421	25.979
30	p.G287S	c.859G>A	chr1:41285571	ClinVar	4	AGTGACAAGACACCGCACAC	36.737	30.349	8.691	17.219	2.145	10.121	0	37.557	no_activity
30	p.G287S	c.859G>A	chr1:41285571	ClinVar	5	TGTGCGGTGTCTTGTCACTA	31.892	25.898	11.774	16.713	12.916	14.519	0	19.155	no_activity
30	p.G287S	c.859G>A	chr1:41285571	ClinVar	6	ACAAGACACCGCACACATGG	28.226	23.912	no_activity	3.102	0	0	0	28.098	no_activity
30	p.G287S	c.859G>A	chr1:41285571	ClinVar	7	GTGTCTTGTCACTATAGCCG	27.792	19.42	9.395	8.248	10.921	1.317	0	17.633	no_activity
30	p.G287S	c.859G>A	chr1:41285571	ClinVar	8	ACATTGACAACCATCGGCTA	26.272	22.377	no_activity	13.713	3.948	5.737	0	20.514	no_activity
30	p.G287S	c.859G>A	chr1:41285571	ClinVar	9	AACCATCGGCTATAGTGACA	21.164	22.264	33.8	13.789	4.131	5.865	0.56	31.317	34.487
30	p.G287S	c.859G>A	chr1:41285571	ClinVar	10	TTGACAACCATCGGCTATAG	20.8	12.536	26.532	0.029	0	0.038	0	21.529	27.363
30	p.G287S	c.859G>A	chr1:41285571	ClinVar	11	ATTGACAACCATCGGCTATA	19.991	18.541	no_activity	16.963	19.518	9.081	0.122	32.993	no_activity
30	p.G287S	c.859G>A	chr1:41285571	ClinVar	12	TGACAAGACACCGCACACAT	19.183	21.013	22.598	2.034	0	3.746	0	36.494	29.549
30	p.G287S	c.859G>A	chr1:41285571	ClinVar	13	GTGCGGTGTCTTGTCACTAT	no_activity	no_activity	16.747	no_activity	no_activity	no_activity	no_activity	21.006	13.358
30	p.G287S	c.859G>A	chr1:41285571	ClinVar	14	CGGCTATAGTGACAAGACAC	no_activity	no_activity	10.41	no_activity	no_activity	no_activity	no_activity	31.496	32.408
30	p.G287S	c.859G>A	chr1:41285571	ClinVar	15	ACTATAGCCGATGGTTGTCA	no_activity	no_activity	no_activity	no_activity	no_activity	no_activity	no_activity	12.041	no_activity
30	p.G287S	c.859G>A	chr1:41285571	ClinVar	16	TTGTCACTATAGCCGATGGT	no_activity	no_activity	38.559	no_activity	no_activity	no_activity	no_activity	29.199	12.913
30	p.G287S	c.859G>A	chr1:41285571	ClinVar	17	GCTATAGTGACAAGACACCG	no_activity	no_activity	no_activity	no_activity	no_activity	no_activity	no_activity	32.364	no_activity
30	p.G287S	c.859G>A	chr1:41285571	ClinVar	18	CGGTGTCTTGTCACTATAGC	4.541	2.56	0.959	0.777	0	0	0	10.015	13.377
30	p.G287S	c.859G>A	chr1:41285571	ClinVar	19	GTCTTGTCACTATAGCCGAT	no_activity	no_activity	16.267	no_activity	no_activity	no_activity	no_activity	47.207	17.648
30	p.G287S	c.859G>A	chr1:41285571	ClinVar	20	GACAAGACACCGCACACATG	no_activity	no_activity	no_activity	no_activity	no_activity	no_activity	no_activity	8.322	no_activity
30	p.G287S	c.859G>A	chr1:41285571	ClinVar	21	CATTGACAACCATCGGCTAT	no_activity	no_activity	3.138	no_activity	no_activity	no_activity	no_activity	34.182	24.173
30	p.G287S	c.859G>A	chr1:41285571	ClinVar	22	CTATAGCCGATGGTTGTCAA	no_activity	no_activity	6.754	no_activity	no_activity	no_activity	no_activity	49.091	14.38
30	p.G287S	c.859G>A	chr1:41285571	ClinVar	23	GTGTGCGGTGTCTTGTCACT	no_activity	no_activity	no_activity	no_activity	no_activity	no_activity	no_activity	22.682	13.632
30	p.G287S	c.859G>A	chr1:41285571	ClinVar	24	ACCATCGGCTATAGTGACAA	no_activity	no_activity	no_activity	no_activity	no_activity	no_activity	no_activity	32.954	no_activity
30	p.G287S	c.859G>A	chr1:41285571	ClinVar	25	TACATTGACAACCATCGGCT	no_activity	no_activity	no_activity	no_activity	no_activity	no_activity	no_activity	9.512	11.782
30	p.G287S	c.859G>A	chr1:41285571	ClinVar	26	ACAACCATCGGCTATAGTGA	no_activity	no_activity	no_activity	no_activity	no_activity	no_activity	no_activity	29.285	32.426
30	p.G287S	c.859G>A	chr1:41285571	ClinVar	27	TGACAACCATCGGCTATAGT	no_activity	no_activity	no_activity	no_activity	no_activity	no_activity	no_activity	9.225	no_activity
30	p.G287S	c.859G>A	chr1:41285571	ClinVar	28	TCACTATAGCCGATGGTTGT	no_activity	no_activity	no_activity	no_activity	no_activity	no_activity	no_activity	3.606	no_activity
30	p.G287S	c.859G>A	chr1:41285571	ClinVar	29	TAGCCGATGGTTGTCAATGT	no_activity	no_activity	no_activity	no_activity	no_activity	no_activity	no_activity	12.459	no_activity
30	p.G287S	c.859G>A	chr1:41285571	ClinVar	30	TATAGCCGATGGTTGTCAAT	no_activity	no_activity	no_activity	no_activity	no_activity	no_activity	no_activity	8.253	no_activity
30	p.G287S	c.859G>A	chr1:41285571	ClinVar	31	CCATGTGTGCGGTGTCTTGT	no_activity	no_activity	no_activity	no_activity	no_activity	no_activity	no_activity	2.172	no_activity
30	p.G287S	c.859G>A	chr1:41285571	ClinVar	32	CATCGGCTATAGTGACAAGA	no_activity	no_activity	no_activity	no_activity	no_activity	no_activity	no_activity	12.863	no_activity
30	p.G287S	c.859G>A	chr1:41285571	ClinVar	33	TATAGTGACAAGACACCGCA	no_activity	no_activity	no_activity	no_activity	no_activity	no_activity	no_activity	14.898	no_activity
30	p.G287S	c.859G>A	chr1:41285571	ClinVar	34	TGTGTGCGGTGTCTTGTCAC	no_activity	no_activity	no_activity	no_activity	no_activity	no_activity	no_activity	19.235	no_activity
30	p.G287S	c.859G>A	chr1:41285571	ClinVar	35	TCTTGTCACTATAGCCGATG	no_activity	no_activity	no_activity	no_activity	no_activity	no_activity	no_activity	20.664	no_activity
30	p.G287S	c.859G>A	chr1:41285571	ClinVar	36	GGTGTCTTGTCACTATAGCC	no_activity	no_activity	no_activity	no_activity	no_activity	no_activity	no_activity	27.455	12.611
30	p.G287S	c.859G>A	chr1:41285571	ClinVar	37	CACTATAGCCGATGGTTGTC	no_activity	no_activity	no_activity	no_activity	no_activity	no_activity	no_activity	28.74	no_activity
30	p.G287S	c.859G>A	chr1:41285571	ClinVar	38	TAGTGACAAGACACCGCACA	no_activity	no_activity	no_activity	no_activity	no_activity	no_activity	no_activity	31.329	no_activity
30	p.G287S	c.859G>A	chr1:41285571	ClinVar	39	TTACATTGACAACCATCGGC	no_activity	no_activity	no_activity	no_activity	no_activity	no_activity	no_activity	0	no_activity
31	p.G287R	c.859G>C	chr1:41285571	ClinVar and HGMD	1	ACCCTGCCCAGCCATGTGTG	59.898	60.145	41.923	55.15	57.576	51.51	34.742	49.123	42.287
31	p.G287R	c.859G>C	chr1:41285571	ClinVar and HGMD	2	GTGACAAGACACCGCACACA	59.154	55.191	41.59	51.577	49.028	49.136	37.361	39.933	29.577
31	p.G287R	c.859G>C	chr1:41285571	ClinVar and HGMD	3	ACCGCACACATGGCTGGGCA	56.605	51.504	38.009	39.03	17.732	32.035	0.54	47.708	26.777
31	p.G287R	c.859G>C	chr1:41285571	ClinVar and HGMD	4	TGTCTTGTCACGATAGCCGA	52.308	46.484	28.965	13.844	13.864	6.88	0	34.111	23.003
31	p.G287R	c.859G>C	chr1:41285571	ClinVar and HGMD	5	TGTAATCTGGAGACACAAAC	51.411	43.071	20.914	1.013	0	0	0.069	37.861	30.467
31	p.G287R	c.859G>C	chr1:41285571	ClinVar and HGMD	6	CACCGCACACATGGCTGGGC	42.368	36.529	12.89	4.146	0.019	6.873	0.181	30.756	18.023
31	p.G287R	c.859G>C	chr1:41285571	ClinVar and HGMD	7	ATGTAATCTGGAGACACAAA	38.204	35.427	22.475	21.39	12.667	14.244	0	43.713	24.539
31	p.G287R	c.859G>C	chr1:41285571	ClinVar and HGMD	8	CAACCATCGGCTATCGTGAC	37.459	19.296	1.559	0.431	0	0	0	35.282	20.97
31	p.G287R	c.859G>C	chr1:41285571	ClinVar and HGMD	9	CGTGACAAGACACCGCACAC	34.871	26.842	5.431	1.201	0	1.76	0	34.743	no_activity
31	p.G287R	c.859G>C	chr1:41285571	ClinVar and HGMD	10	GACCCTGCCCAGCCATGTGT	31.524	22.518	no_activity	16.369	10.403	1.244	1.588	15.887	no_activity
31	p.G287R	c.859G>C	chr1:41285571	ClinVar and HGMD	11	ACACCGCACACATGGCTGGG	31.079	33.174	15.851	35.118	33.912	30.365	8.194	32.236	29.226
31	p.G287R	c.859G>C	chr1:41285571	ClinVar and HGMD	12	TGTGCGGTGTCTTGTCACGA	29.724	21.432	11.194	15.186	15.165	13.967	0	17.038	no_activity
31	p.G287R	c.859G>C	chr1:41285571	ClinVar and HGMD	13	ACAAGACACCGCACACATGG	28.382	23.597	no_activity	3.994	0	0	0	28.38	no_activity
31	p.G287R	c.859G>C	chr1:41285571	ClinVar and HGMD	14	GTGTCTTGTCACGATAGCCG	27.332	19.858	8.868	5.309	10.167	1.312	0	20.053	no_activity
31	p.G287R	c.859G>C	chr1:41285571	ClinVar and HGMD	15	TTTGTGTCTCCAGATTACAT	25.952	22.832	33.217	10.75	5.255	12.469	0	24.348	33.225
31	p.G287R	c.859G>C	chr1:41285571	ClinVar and HGMD	16	GTAATCTGGAGACACAAACA	no_activity	no_activity	36.505	no_activity	no_activity	no_activity	no_activity	50.451	36.332
31	p.G287R	c.859G>C	chr1:41285571	ClinVar and HGMD	17	ATGTGTGCGGTGTCTTGTCA	25.386	15.011	11.033	2.611	0.3	0	0	35.918	39.747
31	p.G287R	c.859G>C	chr1:41285571	ClinVar and HGMD	18	GGACCCTGCCCAGCCATGTG	no_activity	no_activity	no_activity	no_activity	no_activity	no_activity	no_activity	42.25	49.402
31	p.G287R	c.859G>C	chr1:41285571	ClinVar and HGMD	19	TTGACAACCATCGGCTATCG	21.321	11.972	27.863	0	0	0.125	0	22.463	28.652
31	p.G287R	c.859G>C	chr1:41285571	ClinVar and HGMD	20	TGACAAGACACCGCACACAT	20.73	21.601	24.902	2.009	0	3.778	0	39.785	32.514
31	p.G287R	c.859G>C	chr1:41285571	ClinVar and HGMD	21	AGGACCCTGCCCAGCCATGT	20.432	21.533	10.393	18.868	17.115	8.745	0	17.107	no_activity
31	p.G287R	c.859G>C	chr1:41285571	ClinVar and HGMD	22	ACACATGGCTGGGCAGGGTC	18.087	12.662	no_activity	0.957	0.229	0	0	24.49	no_activity
31	p.G287R	c.859G>C	chr1:41285571	ClinVar and HGMD	23	AACCATCGGCTATCGTGACA	17.32	19.985	28.527	6.759	0.83	2.645	0	25.994	26.074
31	p.G287R	c.859G>C	chr1:41285571	ClinVar and HGMD	24	CCTGCCCAGCCATGTGTGCG	17.19	15.693	no_activity	4.879	0.867	7.493	0	36.616	no_activity
31	p.G287R	c.859G>C	chr1:41285571	ClinVar and HGMD	25	AGACACCGCACACATGGCTG	11.828	14.787	12.626	8.727	5.59	5.447	0	29.505	19.138
31	p.G287R	c.859G>C	chr1:41285571	ClinVar and HGMD	26	CCGCACACATGGCTGGGCAG	no_activity	no_activity	21.018	no_activity	no_activity	no_activity	no_activity	35.62	no_activity
31	p.G287R	c.859G>C	chr1:41285571	ClinVar and HGMD	27	ATTGACAACCATCGGCTATC	11.15	11.022	no_activity	5.049	10.85	2.75	0	23.003	no_activity
31	p.G287R	c.859G>C	chr1:41285571	ClinVar and HGMD	28	GTGCGGTGTCTTGTCACGAT	no_activity	no_activity	16.335	no_activity	no_activity	no_activity	no_activity	24.238	13.635
31	p.G287R	c.859G>C	chr1:41285571	ClinVar and HGMD	29	CGGCTATCGTGACAAGACAC	no_activity	no_activity	9.685	no_activity	no_activity	no_activity	no_activity	32.288	28.982
31	p.G287R	c.859G>C	chr1:41285571	ClinVar and HGMD	30	TTGTCACGATAGCCGATGGT	no_activity	no_activity	39.942	no_activity	no_activity	no_activity	no_activity	30.699	17.239
31	p.G287R	c.859G>C	chr1:41285571	ClinVar and HGMD	31	CATGTGTGCGGTGTCTTGTC	no_activity	no_activity	no_activity	no_activity	no_activity	no_activity	no_activity	no_activity	7.367
31	p.G287R	c.859G>C	chr1:41285571	ClinVar and HGMD	32	CGGTGTCTTGTCACGATAGC	4.655	3.323	1.999	0.496	0.117	0	0	11.912	18.443
31	p.G287R	c.859G>C	chr1:41285571	ClinVar and HGMD	33	ACGATAGCCGATGGTTGTCA	no_activity	no_activity	no_activity	no_activity	no_activity	no_activity	no_activity	9.373	no_activity
31	p.G287R	c.859G>C	chr1:41285571	ClinVar and HGMD	34	GTCTTGTCACGATAGCCGAT	no_activity	no_activity	21.501	no_activity	no_activity	no_activity	no_activity	49.703	22.952
31	p.G287R	c.859G>C	chr1:41285571	ClinVar and HGMD	35	CTGCCCAGCCATGTGTGCGG	no_activity	no_activity	27.853	no_activity	no_activity	no_activity	no_activity	33.981	12.293
31	p.G287R	c.859G>C	chr1:41285571	ClinVar and HGMD	36	GCTATCGTGACAAGACACCG	no_activity	no_activity	no_activity	no_activity	no_activity	no_activity	no_activity	29.094	no_activity
31	p.G287R	c.859G>C	chr1:41285571	ClinVar and HGMD	37	GTGTCTCCAGATTACATTGA	no_activity	no_activity	17.488	no_activity	no_activity	no_activity	no_activity	21.996	no_activity
31	p.G287R	c.859G>C	chr1:41285571	ClinVar and HGMD	38	GTAACCTGTTTGTGTCTCCA	no_activity	no_activity	no_activity	no_activity	no_activity	no_activity	no_activity	44.671	no_activity
31	p.G287R	c.859G>C	chr1:41285571	ClinVar and HGMD	39	AATGTAATCTGGAGACACAA	no_activity	no_activity	no_activity	no_activity	no_activity	no_activity	no_activity	9.65	30.09
31	p.G287R	c.859G>C	chr1:41285571	ClinVar and HGMD	40	GACAAGACACCGCACACATG	no_activity	no_activity	no_activity	no_activity	no_activity	no_activity	no_activity	8.816	no_activity
31	p.G287R	c.859G>C	chr1:41285571	ClinVar and HGMD	41	TCTGGAGACACAAACAGGTT	no_activity	no_activity	no_activity	no_activity	no_activity	no_activity	no_activity	5.399	20.124
31	p.G287R	c.859G>C	chr1:41285571	ClinVar and HGMD	42	CCCTGCCCAGCCATGTGTGC	no_activity	no_activity	3.691	no_activity	no_activity	no_activity	no_activity	38.124	18.85
31	p.G287R	c.859G>C	chr1:41285571	ClinVar and HGMD	43	CGATAGCCGATGGTTGTCAA	no_activity	no_activity	6.531	no_activity	no_activity	no_activity	no_activity	49.171	12.837
31	p.G287R	c.859G>C	chr1:41285571	ClinVar and HGMD	44	CATTGACAACCATCGGCTAT	no_activity	no_activity	2.634	no_activity	no_activity	no_activity	no_activity	34.853	21.314
31	p.G287R	c.859G>C	chr1:41285571	ClinVar and HGMD	45	TCACGATAGCCGATGGTTGT	no_activity	no_activity	no_activity	no_activity	no_activity	no_activity	no_activity	3.331	no_activity
31	p.G287R	c.859G>C	chr1:41285571	ClinVar and HGMD	46	GTGTGCGGTGTCTTGTCACG	no_activity	no_activity	no_activity	no_activity	no_activity	no_activity	no_activity	19.217	12.61
31	p.G287R	c.859G>C	chr1:41285571	ClinVar and HGMD	47	ACCATCGGCTATCGTGACAA	no_activity	no_activity	no_activity	no_activity	no_activity	no_activity	no_activity	32.572	no_activity
31	p.G287R	c.859G>C	chr1:41285571	ClinVar and HGMD	48	CCCAGCCATGTGTGCGGTGT	no_activity	no_activity	no_activity	no_activity	no_activity	no_activity	no_activity	12.141	no_activity
31	p.G287R	c.859G>C	chr1:41285571	ClinVar and HGMD	49	TAGCCGATGGTTGTCAATGT	no_activity	no_activity	no_activity	no_activity	no_activity	no_activity	no_activity	13.086	no_activity
31	p.G287R	c.859G>C	chr1:41285571	ClinVar and HGMD	50	TGTTTGTGTCTCCAGATTAC	no_activity	no_activity	no_activity	no_activity	no_activity	no_activity	no_activity	15.702	no_activity
31	p.G287R	c.859G>C	chr1:41285571	ClinVar and HGMD	51	ACAACCATCGGCTATCGTGA	no_activity	no_activity	no_activity	no_activity	no_activity	no_activity	no_activity	31.561	28.841
31	p.G287R	c.859G>C	chr1:41285571	ClinVar and HGMD	52	GATAGCCGATGGTTGTCAAT	no_activity	no_activity	no_activity	no_activity	no_activity	no_activity	no_activity	10.882	no_activity
31	p.G287R	c.859G>C	chr1:41285571	ClinVar and HGMD	53	TACATTGACAACCATCGGCT	no_activity	no_activity	no_activity	no_activity	no_activity	no_activity	no_activity	3.562	no_activity
31	p.G287R	c.859G>C	chr1:41285571	ClinVar and HGMD	54	TGACAACCATCGGCTATCGT	no_activity	no_activity	no_activity	no_activity	no_activity	no_activity	no_activity	7.078	no_activity
31	p.G287R	c.859G>C	chr1:41285571	ClinVar and HGMD	55	TATCGTGACAAGACACCGCA	no_activity	no_activity	no_activity	no_activity	no_activity	no_activity	no_activity	12.423	no_activity
31	p.G287R	c.859G>C	chr1:41285571	ClinVar and HGMD	56	TCTTGTCACGATAGCCGATG	no_activity	no_activity	no_activity	no_activity	no_activity	no_activity	no_activity	21.259	no_activity
31	p.G287R	c.859G>C	chr1:41285571	ClinVar and HGMD	57	CCATGTGTGCGGTGTCTTGT	no_activity	no_activity	no_activity	no_activity	no_activity	no_activity	no_activity	12.331	1.949
31	p.G287R	c.859G>C	chr1:41285571	ClinVar and HGMD	58	TTGTGTCTCCAGATTACATT	no_activity	no_activity	no_activity	no_activity	no_activity	no_activity	no_activity	6.007	no_activity
31	p.G287R	c.859G>C	chr1:41285571	ClinVar and HGMD	59	CATCGGCTATCGTGACAAGA	no_activity	no_activity	no_activity	no_activity	no_activity	no_activity	no_activity	10.36	no_activity
31	p.G287R	c.859G>C	chr1:41285571	ClinVar and HGMD	60	CACGATAGCCGATGGTTGTC	no_activity	no_activity	no_activity	no_activity	no_activity	no_activity	no_activity	32.22	no_activity
31	p.G287R	c.859G>C	chr1:41285571	ClinVar and HGMD	61	GACACCGCACACATGGCTGG	no_activity	no_activity	no_activity	no_activity	no_activity	no_activity	no_activity	4.52	7.195
31	p.G287R	c.859G>C	chr1:41285571	ClinVar and HGMD	62	CTGTTTGTGTCTCCAGATTA	no_activity	no_activity	no_activity	no_activity	no_activity	no_activity	no_activity	12.209	no_activity
31	p.G287R	c.859G>C	chr1:41285571	ClinVar and HGMD	63	GTCAATGTAATCTGGAGACA	no_activity	no_activity	no_activity	no_activity	no_activity	no_activity	no_activity	14.434	no_activity
31	p.G287R	c.859G>C	chr1:41285571	ClinVar and HGMD	64	TGTGTGCGGTGTCTTGTCAC	no_activity	no_activity	no_activity	no_activity	no_activity	no_activity	no_activity	35.087	no_activity
31	p.G287R	c.859G>C	chr1:41285571	ClinVar and HGMD	65	CAATGTAATCTGGAGACACA	no_activity	no_activity	no_activity	no_activity	no_activity	no_activity	no_activity	0.405	no_activity
31	p.G287R	c.859G>C	chr1:41285571	ClinVar and HGMD	66	GGTGTCTTGTCACGATAGCC	no_activity	no_activity	no_activity	no_activity	no_activity	no_activity	no_activity	23.8	8.545
31	p.G287R	c.859G>C	chr1:41285571	ClinVar and HGMD	67	TCGTGACAAGACACCGCACA	no_activity	no_activity	no_activity	no_activity	no_activity	no_activity	no_activity	29.228	no_activity
32	p.P291S	c.871C>T	chr1:41285583	ClinVar and HGMD	1	AAGACATCGCACACATGGCT	58.073	53.843	42.399	44.323	43.551	43.815	10.439	29.693	15.348
32	p.P291S	c.871C>T	chr1:41285583	ClinVar and HGMD	2	GTGACAAGACATCGCACACA	57.492	54.384	40.345	51.012	49.544	50.602	36.63	41.511	24.397
[truncated: 1,477 more rows]

## Sheet: Supplementary Table 4
Supplementary Table 4. Primer sequence
No	Primers name	Primers sequence (5' to 3')
1	Reporter Kcnq4 Mut Target FP	AATTCTATGCCGACTCGCTCTGGTCGGGGACGGTGCGTC
2	Reporter Kcnq4 Mut Target RP	GATCCGACGCACCGTCCCCGACCAGAGCGAGTCGGCATAG
3	Kcnq4 Mut sgRNA T1 FP	GATGCCGACTCGCTCTGGTCG
4	Kcnq4 Mut sgRNA T1 RP	CGACCAGAGCGAGTCGGCATC
5	Kcnq4 Mut sgRNA T2 FP	GTATGCCGACTCGCTCTGGTC
6	Kcnq4 Mut sgRNA T2 RP	GACCAGAGCGAGTCGGCATAC
7	Kcnq4 Mut sgRNA T3 FP	GCGACTCGCTCTGGTCGGGGA
8	Kcnq4 Mut sgRNA T3 RP	TCCCCGACCAGAGCGAGTCGC
9	Kcnq4 Mut sgRNA T4 FP	GCTATGCCGACTCGCTCTGGT
10	Kcnq4 Mut sgRNA T4 RP	ACCAGAGCGAGTCGGCATAGC
11	Mouse Kcnq4 WT T7E1 T7E1 FP	AGGAGAGGACTGCTCCCAAT
12	Mouse Kcnq4 WT T7E1 T7E1 RP	AGGGACCTGACACAAGGACT
13	Mouse Kcnq4 WT T7E1 T7E1 FP1	AGGCTGGAAAGGAACCGATG
14	Mouse Kcnq4 WT T7E1 T7E1 RP1	GGGCTTCCTCTGCAACCATA
15	Mouse Kcnq4 WT NGS FP	ACACTCTTTCCCTACACGACGCTCTTCCGATCTCAGGAGCTGATCACCGCCTG
16	Mouse Kcnq4 WT NGS RP	GTGACTGGAGTTCAGACGTGTGCTCTTCCGATCTGGCATCCTAGGAAGACAGAACC
17	Lenti mRFP T7E1 FP	TCCCCGACTACTTGAAGCTG
18	Lenti eGFP T7E1 RP	CTCACTGGCGGCCGCTTTACTTG
19	Lenti mRFP T7E1 FP1	CCGAGGTCAAGACCACCTAC
20	Lenti eGFP T7E1 RP1	TTGTACTCCAGCTTGTGCCC
21	Lenti Reporter NGS FP	ACACTCTTTCCCTACACGACGCTCTTCCGATCTCCATCGTGGAACAGTACGAG
22	Lenti Reporter GFP NGS RP	GTGACTGGAGTTCAGACGTGTGCTCTTCCGATCTGAACTTGTGGCCGTTTACGT
23	Kcnq4 T3 IVT sgRNA FP	GAAATTAATACGACTCACTATAGCGACTCGCTCTGGTCGGGGAGTTTTAGAGCTAGAAATAGCAAG
24	Kcnq4 T3 IVT sgRNA RP	AAAAAAGCACCGACTCGGTGCCACTTTTTCAAGTTGATAACGGACTAGCCTTATTTTAACTTGCTATTTCTAGCTCTAAAAC
